# Supplementary material for: Assessments of life cycle and biodegradation properties uncovered distinct profiles of pharmaceutical excipients guiding selection for drug formulations
Source: Royal Society of Chemistry journal article supplement (doi:10.1039/d5gc02518d), 2025-01-01
Supplement: d5gc02518d2.xlsx [file d5gc02518d2.xlsx]

## Sheet: HPC M CT
Cradle to gate chemical tree for HPC M (hydroxypropyl cellulose)
Key	Natural resources	Unallocated	Allocated
Level 1	Level 2	Level 3	Level 4	Level 5	Level 6	Level 7	Level 8	Level 9	Level 10	Level 11
hydroxypropyl cellulose	acetic acid	Carbon monoxide	Carbon dioxide	Natural gas	blue water
1000	88.6342	46.6216	23.2943	4.80007	1.55323
					Natural gas (unprocessed)
					4.89607
				nitrogen from air	Air (untreated)
				8.95903	8.95904
				oxygen from air	Air (untreated)
				3.97704	3.97704
				Water for rxn	Water (untreated)
				6.21145	6.21145
			Natural gas	blue water
			15.7143	5.0849
				Natural gas (unprocessed)
				16.0286
			Water for rxn	Water (untreated)
			9.51127	9.51127
		methanol	Natural gas	blue water
		48.6602	25.0319	8.09993
				Natural gas (unprocessed)
				25.5325
			oxygen from air	Air (untreated)
			25.0066	25.0066
			Water for rxn	Water (untreated)
			44.6573	44.6573
	cellulose	Dissolving pulp	biomass for pulp	blue water
	491.983	491.983	3485.06	2727.85
				N in DAP	diammonium phosphate (DAP)	Ammonia	Natural gas	blue water
				1.18934	2.69081	0.691	0.142389	0.0460748
								Natural gas (unprocessed)
								0.145236
							nitrogen from air	Air (untreated)
							0.265759	0.265759
							oxygen from air	Air (untreated)
							0.117974	0.117974
							Water for rxn	Water (untreated)
							0.184255	0.184255
						Phosphoric acid	Phosphate rock	phosphate ore, in ground
						1.9877	4.30966	15.0284
							Sulfuric acid	Sulfur trioxide	oxygen from air	Air (untreated)
							3.69399	2.99886	1.86253	1.86253
									Sulfur	oil (in ground)
									1.29319	1.33199
									Water for rxn	Water (untreated)
									0.112917	0.112917
								Water for rxn	Water (untreated)
								0.75005	0.75005
							Water for rxn	Water (untreated)
							1.16624	1.16624
				P in DAP	diammonium phosphate (DAP)	Ammonia	Natural gas	blue water
				1.31209	2.96852	0.762317	0.157084	0.0508301
								Natural gas (unprocessed)
								0.160226
							nitrogen from air	Air (untreated)
							0.293188	0.293188
							oxygen from air	Air (untreated)
							0.13015	0.13015
							Water for rxn	Water (untreated)
							0.203272	0.203272
						Phosphoric acid	Phosphate rock	phosphate ore, in ground
						2.19285	4.75445	16.5795
							Sulfuric acid	Sulfur trioxide	oxygen from air	Air (untreated)
							4.07525	3.30837	2.05476	2.05476
									Sulfur	oil (in ground)
									1.42666	1.46946
									Water for rxn	Water (untreated)
									0.124571	0.124571
								Water for rxn	Water (untreated)
								0.827462	0.827462
							Water for rxn	Water (untreated)
							1.28661	1.28661
				Urea	Ammonia	Natural gas	blue water
				3.43435	1.94453	0.400693	0.129658
							Natural gas (unprocessed)
							0.408706
						nitrogen from air	Air (untreated)
						0.747867	0.747868
						oxygen from air	Air (untreated)
						0.331989	0.331989
						Water for rxn	Water (untreated)
						0.518509	0.518509
					Carbon dioxide	Natural gas	blue water
					2.51257	0.517744	0.167534
							Natural gas (unprocessed)
							0.528099
						nitrogen from air	Air (untreated)
						0.966336	0.966338
						oxygen from air	Air (untreated)
						0.42897	0.428971
						Water for rxn	Water (untreated)
						0.669978	0.669978
			calcium monoxide	Calcium carbonate	Limestone (in ground)
			13.7277	27.4554	29.5214
			hydrogen peroxide	Benzene	pyrolysis gas	Naphtha	blue water
			13.2849	1.01566	0.294856	0.300629	0.842964
							oil (in ground)
							0.304537
					reformate, from naphtha	Naphtha	blue water
					0.72374	0.734664	2.06
							oil (in ground)
							0.744215
				Hydrogen	hydrogen from SMR natural gas	Methane	Natural gas	blue water
				0.832843	0.832843	1.74377	1.76452	0.570973
								Natural gas (unprocessed)
								1.79981
						oxygen from air	Air (untreated)
						0.309041	0.309041
						Water for rxn	Water (untreated)
						3.79911	3.79911
				oxygen from air	Air (untreated)
				20.3133	20.3133
			Methane	Natural gas	blue water
			2.21414	2.2405	0.724992
					Natural gas (unprocessed)
					2.28531
			oxygen from air	Air (untreated)
			1984.69	1984.7
			Sodium chlorate	sodium chloride in brine 26 wtpct	salt rock, in ground
			25.2413	56.669	56.669
			Sodium hydroxide	sodium chloride in brine 26 wtpct	salt rock, in ground
			84.5803	68.463	68.463
				Water for rxn	Water (untreated)
				19.984	19.984
			Sodium sulfate	Sulfuric acid	Sulfur trioxide	oxygen from air	Air (untreated)
			9.29941	2.66196	2.16103	1.34217	1.34217
						Sulfur	oil (in ground)
						0.931898	0.959855
						Water for rxn	Water (untreated)
						0.0813698	0.0813698
					Water for rxn	Water (untreated)
					0.540499	0.540499
				tincal (borax)	B2O3 in tincal ore	borax ore (in ground)
				10.4618	4.21417	16.2083
			Sulfuric acid	Sulfur trioxide	oxygen from air	Air (untreated)
			23.0271	18.6939	11.6104	11.6104
					Sulfur	oil (in ground)
					8.06133	8.30317
					Water for rxn	Water (untreated)
					0.703885	0.703885
				Water for rxn	Water (untreated)
				4.67556	4.67556
	Propylene oxide	ethylene glycol	Ethylene oxide	Ethylene	Naphtha	blue water
	656.224	164.056	118.704	89.1109	90.8556	254.759
						oil (in ground)
						92.0367
				Oxygen	Air (untreated)
				87.1358	87.21
			Water for rxn	Water (untreated)
			46.0568	46.0568
		Hypochlorous acid	Chlorine	sodium chloride in brine 26 wtpct	salt rock, in ground
		747.314	551.15	446.125	446.125
				Water for rxn	Water (untreated)
				130.222	130.222
			Sodium hydroxide	sodium chloride in brine 26 wtpct	salt rock, in ground
			294.103	238.06	238.06
				Water for rxn	Water (untreated)
				69.4886	69.4886
		Propylene	Naphtha	blue water
		615.571	627.623	1759.85
				oil (in ground)
				635.782
		Sodium hydroxide	sodium chloride in brine 26 wtpct	salt rock, in ground
		500.043	404.756	404.756
			Water for rxn	Water (untreated)
			118.146	118.146
	Sodium hydroxide	sodium chloride in brine 26 wtpct	salt rock, in ground
	49.1982	39.8232	39.8232
		Water for rxn	Water (untreated)
		11.6242	11.6242
	tert-butanol	Isobutylene	butenes and butanes	C4 stream	Naphtha	blue water
	124.725	98.8408	99.1701	99.7267	101.679	285.108
						oil (in ground)
						103.001
				Hydrogen	hydrogen from SMR natural gas	Methane	Natural gas	blue water
				0.0558375	0.0558375	0.11691	0.118301	0.0382805
								Natural gas (unprocessed)
								0.120667
						oxygen from air	Air (untreated)
						0.0207194	0.0207195
						Water for rxn	Water (untreated)
						0.254709	0.254709
		Water for rxn	Water (untreated)
		30.9707	30.9707
	Water for rxn	Water (untreated)
	90.7965	90.7965

## Sheet: HPC M CC
Material:	hydroxypropyl cellulose
Date:	6Jun2024
GWP 100, kg CO2							Acidification, kg SO2							Eutrophication, kg N							OzoneDepletion, kg CFC-11							Smog, kg O3
Chemicals	Total impact	Energy impact	Process impact	Cumulative impact	Process / Total this chemical	Process / Total this category	Chemicals	Total impact	Energy impact	Process impact	Cumulative impact	Process / Total this chemical	Process / Total this category	Chemicals	Total impact	Energy impact	Process impact	Cumulative impact	Process / Total this chemical	Process / Total this category	Chemicals	Total impact	Energy impact	Process impact	Cumulative impact	Process / Total this chemical	Process / Total this category	Chemicals	Total impact	Energy impact	Process impact	Cumulative impact	Process / Total this chemical	Process / Total this category
Total	4815.93	5400.21	-584.275			0.0297368	Total	28.007	26.4362	1.57079			0.0560858	Total	1.02418	0.654531	0.369649			0.360922	Total	2.49703e-05	2.49703e-05	0			0	Total	2158.69	343.478	1815.22			0.840886
Carbon dioxide, air	5139.86	5040.29	-650.22	0.923486	0.0193707	0.0178885	sulfur dioxide, air	16.9977	16.7409	0.256841	0.606909	0.0151103	0.00917059	NOx, air	0.580452	0.576763	0.0036887	0.566748	0.00635488	0.00360161	methyl bromide, air	1.8254e-05	1.8254e-05	0	0.731029	0	0	Chlorine, air	1571.49	0	1571.49	0.727981	1	0.727981
Methane, air	424.297	358.354	65.943	0.99972	0.155417	0.0118481	NOx, air	9.174	9.1157	0.0582996	0.934469	0.00635488	0.00208161	ammonium as N, liquid	0.331082	0	0.331082	0.890013	1	0.323266	methyl chloride, air	2.45987e-06	2.45987e-06	0	0.829541	0	0	NOx, air	324.938	322.873	2.06494	0.878506	0.00635488	0.000956569
Nitrous oxide, air	1.50399	1.5028	0.00118767	0.99999	0.000789679	2.1339e-07	SOx, air	0.609056	0.0295128	0.579543	0.956216	0.951543	0.0206928	Ammonia, air	0.0328173	0.00476232	0.028055	0.922056	0.854884	0.0273926	Methyl chloroform, air	1.26701e-06	1.26701e-06	0	0.880282	0	0	Propylene, air	70.3362	0	70.3362	0.911089	1	0.0325828
chlorodifluoromethane, air	0.0451235	0.0451235	0	0.999998	0	0	Ammonia, air	0.520207	0.0754904	0.444717	0.97479	0.854884	0.0158788	Nitric oxide, air	0.0314869	0.0282513	0.00323564	0.952799	0.102761	0.00315925	chlorodifluoromethane, air	1.24651e-06	1.24651e-06	0	0.930201	0	0	Naphtha, air	62.5417	0	62.5417	0.940061	1	0.028972
CFC-113, air	0.00275929	0.00275929	0	0.999999	0	0	Nitric oxide, air	0.491266	0.440782	0.0504831	0.992331	0.102761	0.00180252	Phosphorus emission, liquid	0.0170291	0.0170291	0	0.969426	0	0	carbon tetrachloride, air	9.79393e-07	9.79393e-07	0	0.969424	0	0	tert-butanol, air	19.9971	0	19.9971	0.949325	1	0.00926352
carbon tetrachloride, air	0.00187829	0.00187829	0	0.999999	0	0	Sulfur trioxide, air	0.130086	0	0.130086	0.996976	1	0.00464476	nitrogen, atomic, liquid	0.0140851	0.0140851	0	0.983179	0	0	CFC-113, air	4.50128e-07	4.50128e-07	0	0.98745	0	0	pyrolysis gas, air	19.2116	0	19.2116	0.958224	1	0.00889963
methyl chloride, air	0.00159891	0.00159891	0	0.999999	0	0	Nitrogen dioxide, air	0.0847063	0.0338819	0.0508245	1	0.600008	0.0018147	nitrogen, atomic, air	0.00931529	0.00931529	0	0.992274	0	0	CFC-114, air	1.58467e-07	1.58467e-07	0	0.993796	0	0	Isobutylene, air	17.069	0	17.069	0.966131	1	0.00790708
CFC-114, air	0.00158467	0.00158467	0	1	0	0	Hydrogen fluoride, air	7.89256e-07	0	7.89256e-07	1	1	2.81807e-08	Nitrogen dioxide, air	0.00535949	0.00214375	0.00321574	0.997507	0.600008	0.00313981	CFC-11, air	1.54906e-07	1.54906e-07	0	1	0	0	Propylene oxide, air	11.9634	0	11.9634	0.971673	1	0.00554197
Methyl chloroform, air	0.00154153	0.00154153	0	1	0	0	Air (untreated), raw material	0	0	0	1	0	0	Ammonia, liquid	0.00218159	0.00218159	0	0.999637	0	0	Air (untreated), raw material	0	0	0	1	0	0	Nitric oxide, air	11.3834	10.2136	1.16977	0.976947	0.102761	0.00054189
CFC-11, air	0.000735805	0.000735805	0	1	0	0	bauxite ore (in ground), raw material	0	0	0	1	0	0	COD, liquid	0.000253508	0	0.000253508	0.999885	1	0.000247523	bauxite ore (in ground), raw material	0	0	0	1	0	0	Ethylene, air	10.4921	0	10.4921	0.981807	1	0.00486041
methyl bromide, air	0.000178961	0.000178961	0	1	0	0	blue water, raw material	0	0	0	1	0	0	BOD5, liquid	0.000117717	0	0.000117717	1	1	0.000114937	blue water, raw material	0	0	0	1	0	0	butenes and butanes, air	7.74538	0	7.74538	0.985395	1	0.003588
Air (untreated), raw material	0	0	0	1	0	0	borax ore (in ground), raw material	0	0	0	1	0	0	BOD, liquid	3.33313e-07	0	3.33313e-07	1	1	3.25443e-07	borax ore (in ground), raw material	0	0	0	1	0	0	NMVOC, air	7.58098	7.12393	0.457047	0.988907	0.0602887	0.000211724
bauxite ore (in ground), raw material	0	0	0	1	0	0	coal (in ground), raw material	0	0	0	1	0	0	Air (untreated), raw material	0	0	0	1	0	0	coal (in ground), raw material	0	0	0	1	0	0	1,3-butadiene, air	5.90958	0	5.90958	0.991644	1	0.00273757
blue water, raw material	0	0	0	1	0	0	Limestone (in ground), raw material	0	0	0	1	0	0	bauxite ore (in ground), raw material	0	0	0	1	0	0	Limestone (in ground), raw material	0	0	0	1	0	0	Hypochlorous acid, air	4.98561	0	4.98561	0.993954	1	0.00230955
borax ore (in ground), raw material	0	0	0	1	0	0	Natural gas (unprocessed), raw material	0	0	0	1	0	0	blue water, raw material	0	0	0	1	0	0	Natural gas (unprocessed), raw material	0	0	0	1	0	0	Butene, air	2.684	0	2.684	0.995197	1	0.00124334
coal (in ground), raw material	0	0	0	1	0	0	oil (in ground), raw material	0	0	0	1	0	0	borax ore (in ground), raw material	0	0	0	1	0	0	oil (in ground), raw material	0	0	0	1	0	0	Benzene, air	2.25571	1.51888	0.736832	0.996242	0.326652	0.000341332
Limestone (in ground), raw material	0	0	0	1	0	0	phosphate ore, in ground, raw material	0	0	0	1	0	0	coal (in ground), raw material	0	0	0	1	0	0	phosphate ore, in ground, raw material	0	0	0	1	0	0	Nitrogen dioxide, air	2.03844	0.815359	1.22308	0.997187	0.600008	0.000566583
Natural gas (unprocessed), raw material	0	0	0	1	0	0	salt rock, in ground, raw material	0	0	0	1	0	0	Limestone (in ground), raw material	0	0	0	1	0	0	salt rock, in ground, raw material	0	0	0	1	0	0	acetic acid, air	1.23134	0	1.23134	0.997757	1	0.000570411
oil (in ground), raw material	0	0	0	1	0	0	sand (in ground), raw material	0	0	0	1	0	0	Natural gas (unprocessed), raw material	0	0	0	1	0	0	sand (in ground), raw material	0	0	0	1	0	0	Butene, -1, air	1.17869	0	1.17869	0.998303	1	0.00054602
phosphate ore, in ground, raw material	0	0	0	1	0	0	Uranium, raw material	0	0	0	1	0	0	oil (in ground), raw material	0	0	0	1	0	0	Uranium, raw material	0	0	0	1	0	0	2-butene, air	1.14532	0	1.14532	0.998834	1	0.000530563
salt rock, in ground, raw material	0	0	0	1	0	0	Water (untreated), raw material	0	0	0	1	0	0	phosphate ore, in ground, raw material	0	0	0	1	0	0	Water (untreated), raw material	0	0	0	1	0	0	Carbon monoxide, air	0.444434	0.397913	0.0465206	0.999039	0.104674	2.15503e-05
sand (in ground), raw material	0	0	0	1	0	0	0	0	0	0	1	0	0	salt rock, in ground, raw material	0	0	0	1	0	0	0	0	0	0	1	0	0	methanol, air	0.374691	0	0.374691	0.999213	1	0.000173573
Uranium, raw material	0	0	0	1	0	0	0	0	0	0	1	0	0	sand (in ground), raw material	0	0	0	1	0	0	0	0	0	0	1	0	0	isoprene, air	0.309848	0.309848	0	0.999357	0	0
Water (untreated), raw material	0	0	0	1	0	0	0	0	0	0	1	0	0	Uranium, raw material	0	0	0	1	0	0	0	0	0	0	1	0	0	Methane, air	0.244047	0.206118	0.037929	0.99947	0.155417	1.75704e-05
0	0	0	0	1	0	0	0	0	0	0	1	0	0	Water (untreated), raw material	0	0	0	1	0	0	0	0	0	0	1	0	0	Butane, air	0.166697	0	0.166697	0.999547	1	7.72213e-05
0	0	0	0	1	0	0	0	0	0	0	1	0	0	0	0	0	0	1	0	0	0	0	0	0	1	0	0	Ethylene carbonate, air	0.161168	0	0.161168	0.999621	1	7.46599e-05
0	0	0	0	1	0	0	0	0	0	0	1	0	0	0	0	0	0	1	0	0	0	0	0	0	1	0	0	Propyne, air	0.1285	0	0.1285	0.999681	1	5.9527e-05
0	0	0	0	1	0	0	0	0	0	0	1	0	0	0	0	0	0	1	0	0	0	0	0	0	1	0	0	Hexene, air	0.100919	0	0.100919	0.999728	1	4.67498e-05
0	0	0	0	1	0	0	0	0	0	0	1	0	0	0	0	0	0	1	0	0	0	0	0	0	1	0	0	Ethane, air	0.0958095	0	0.0958095	0.999772	1	4.43831e-05
0	0	0	0	1	0	0	0	0	0	0	1	0	0	0	0	0	0	1	0	0	0	0	0	0	1	0	0	Ethylene oxide, air	0.0806614	0	0.0806614	0.999809	1	3.73659e-05
0	0	0	0	1	0	0	0	0	0	0	1	0	0	0	0	0	0	1	0	0	0	0	0	0	1	0	0	Vinylacetylene, air	0.0760792	0	0.0760792	0.999845	1	3.52432e-05
0	0	0	0	1	0	0	0	0	0	0	1	0	0	0	0	0	0	1	0	0	0	0	0	0	1	0	0	1-Pentene, air	0.0709454	0	0.0709454	0.999878	1	3.2865e-05
0	0	0	0	1	0	0	0	0	0	0	1	0	0	0	0	0	0	1	0	0	0	0	0	0	1	0	0	n-hexane, air	0.0484534	0	0.0484534	0.9999	1	2.24457e-05
0	0	0	0	1	0	0	0	0	0	0	1	0	0	0	0	0	0	1	0	0	0	0	0	0	1	0	0	methyl acetate, air	0.0289499	0	0.0289499	0.999913	1	1.34108e-05
0	0	0	0	1	0	0	0	0	0	0	1	0	0	0	0	0	0	1	0	0	0	0	0	0	1	0	0	1,2-butadiene, air	0.028907	0	0.028907	0.999927	1	1.3391e-05
0	0	0	0	1	0	0	0	0	0	0	1	0	0	0	0	0	0	1	0	0	0	0	0	0	1	0	0	Propane, air	0.0274306	0	0.0274306	0.99994	1	1.2707e-05
0	0	0	0	1	0	0	0	0	0	0	1	0	0	0	0	0	0	1	0	0	0	0	0	0	1	0	0	Isobutane, air	0.0221599	0	0.0221599	0.99995	1	1.02654e-05
0	0	0	0	1	0	0	0	0	0	0	1	0	0	0	0	0	0	1	0	0	0	0	0	0	1	0	0	heptane, air	0.0219423	0	0.0219423	0.99996	1	1.01646e-05
0	0	0	0	1	0	0	1,2-butadiene, air	0	0	0	1	0	0	0	0	0	0	1	0	0	1,2-butadiene, air	0	0	0	1	0	0	Acetylene, air	0.0203633	0	0.0203633	0.999969	1	9.43314e-06
0	0	0	0	1	0	0	1,3-butadiene, air	0	0	0	1	0	0	0	0	0	0	1	0	0	1,3-butadiene, air	0	0	0	1	0	0	formaldehyde, air	0.0198808	0.0198808	0	0.999979	0	0
0	0	0	0	1	0	0	1-Pentene, air	0	0	0	1	0	0	0	0	0	0	1	0	0	1-Pentene, air	0	0	0	1	0	0	n-Pentane, air	0.0175605	0	0.0175605	0.999987	1	8.13477e-06
1,2-butadiene, air	0	0	0	1	0	0	2-butene, air	0	0	0	1	0	0	0	0	0	0	1	0	0	2-butene, air	0	0	0	1	0	0	Octane, air	0.0137691	0	0.0137691	0.999993	1	6.37846e-06
1,3-butadiene, air	0	0	0	1	0	0	Acetaldehyde, air	0	0	0	1	0	0	1,2-butadiene, air	0	0	0	1	0	0	Acetaldehyde, air	0	0	0	1	0	0	toluene, air	0.00805404	0	0.00805404	0.999997	1	3.73098e-06
1-Pentene, air	0	0	0	1	0	0	acetic acid, air	0	0	0	1	0	0	1,3-butadiene, air	0	0	0	1	0	0	acetic acid, air	0	0	0	1	0	0	cyclohexane, air	0.00343706	0	0.00343706	0.999998	1	1.59219e-06
2-butene, air	0	0	0	1	0	0	Acetylene, air	0	0	0	1	0	0	1-Pentene, air	0	0	0	1	0	0	Acetylene, air	0	0	0	1	0	0	High alkanes, air	0.0018002	0	0.0018002	0.999999	1	8.33931e-07
Acetaldehyde, air	0	0	0	1	0	0	Argon, air	0	0	0	1	0	0	2-butene, air	0	0	0	1	0	0	Ammonia, air	0	0	0	1	0	0	ethanol, air	0.000946236	0	0.000946236	1	1	4.38337e-07
acetic acid, air	0	0	0	1	0	0	Arsenic, air	0	0	0	1	0	0	Acetaldehyde, air	0	0	0	1	0	0	Argon, air	0	0	0	1	0	0	Acetaldehyde, air	0.000597121	0	0.000597121	1	1	2.76612e-07
Acetylene, air	0	0	0	1	0	0	Benzene, air	0	0	0	1	0	0	acetic acid, air	0	0	0	1	0	0	Arsenic, air	0	0	0	1	0	0	methyl chloride, air	4.7132e-06	4.7132e-06	0	1	0	0
Ammonia, air	0	0	0	1	0	0	beryllium, air	0	0	0	1	0	0	Acetylene, air	0	0	0	1	0	0	Benzene, air	0	0	0	1	0	0	methyl bromide, air	6.69874e-07	6.69874e-07	0	1	0	0
Argon, air	0	0	0	1	0	0	Boric acid, air	0	0	0	1	0	0	Argon, air	0	0	0	1	0	0	beryllium, air	0	0	0	1	0	0	Methyl chloroform, air	5.15223e-08	5.15223e-08	0	1	0	0
Arsenic, air	0	0	0	1	0	0	Butane, air	0	0	0	1	0	0	Arsenic, air	0	0	0	1	0	0	Boric acid, air	0	0	0	1	0	0	Air (untreated), raw material	0	0	0	1	0	0
Benzene, air	0	0	0	1	0	0	Butene, air	0	0	0	1	0	0	Benzene, air	0	0	0	1	0	0	Butane, air	0	0	0	1	0	0	bauxite ore (in ground), raw material	0	0	0	1	0	0
beryllium, air	0	0	0	1	0	0	Butene, -1, air	0	0	0	1	0	0	beryllium, air	0	0	0	1	0	0	Butene, air	0	0	0	1	0	0	blue water, raw material	0	0	0	1	0	0
Boric acid, air	0	0	0	1	0	0	butenes and butanes, air	0	0	0	1	0	0	Boric acid, air	0	0	0	1	0	0	Butene, -1, air	0	0	0	1	0	0	borax ore (in ground), raw material	0	0	0	1	0	0
Butane, air	0	0	0	1	0	0	cadmium, air	0	0	0	1	0	0	Butane, air	0	0	0	1	0	0	butenes and butanes, air	0	0	0	1	0	0	coal (in ground), raw material	0	0	0	1	0	0
Butene, air	0	0	0	1	0	0	Carbon dioxide, air	0	0	0	1	0	0	Butene, air	0	0	0	1	0	0	cadmium, air	0	0	0	1	0	0	Limestone (in ground), raw material	0	0	0	1	0	0
Butene, -1, air	0	0	0	1	0	0	Carbon dioxide, biogenic, air	0	0	0	1	0	0	Butene, -1, air	0	0	0	1	0	0	Carbon dioxide, air	0	0	0	1	0	0	Natural gas (unprocessed), raw material	0	0	0	1	0	0
butenes and butanes, air	0	0	0	1	0	0	Carbon monoxide, air	0	0	0	1	0	0	butenes and butanes, air	0	0	0	1	0	0	Carbon dioxide, biogenic, air	0	0	0	1	0	0	oil (in ground), raw material	0	0	0	1	0	0
cadmium, air	0	0	0	1	0	0	carbon tetrachloride, air	0	0	0	1	0	0	cadmium, air	0	0	0	1	0	0	Carbon monoxide, air	0	0	0	1	0	0	phosphate ore, in ground, raw material	0	0	0	1	0	0
Carbon dioxide, biogenic, air	0	0	0	1	0	0	carbon tetrafluoride, air	0	0	0	1	0	0	Carbon dioxide, air	0	0	0	1	0	0	carbon tetrafluoride, air	0	0	0	1	0	0	salt rock, in ground, raw material	0	0	0	1	0	0
Carbon monoxide, air	0	0	0	1	0	0	CFC-11, air	0	0	0	1	0	0	Carbon dioxide, biogenic, air	0	0	0	1	0	0	Chlorine, air	0	0	0	1	0	0	sand (in ground), raw material	0	0	0	1	0	0
carbon tetrafluoride, air	0	0	0	1	0	0	CFC-113, air	0	0	0	1	0	0	Carbon monoxide, air	0	0	0	1	0	0	chromium, air	0	0	0	1	0	0	Uranium, raw material	0	0	0	1	0	0
Chlorine, air	0	0	0	1	0	0	CFC-114, air	0	0	0	1	0	0	carbon tetrachloride, air	0	0	0	1	0	0	chromium VI, air	0	0	0	1	0	0	Water (untreated), raw material	0	0	0	1	0	0
chromium, air	0	0	0	1	0	0	Chlorine, air	0	0	0	1	0	0	carbon tetrafluoride, air	0	0	0	1	0	0	COD, air	0	0	0	1	0	0	0	0	0	0	1	0	0
chromium VI, air	0	0	0	1	0	0	chlorodifluoromethane, air	0	0	0	1	0	0	CFC-11, air	0	0	0	1	0	0	cyclohexane, air	0	0	0	1	0	0	0	0	0	0	1	0	0
COD, air	0	0	0	1	0	0	chromium, air	0	0	0	1	0	0	CFC-113, air	0	0	0	1	0	0	Dichlorine monoxide, air	0	0	0	1	0	0	0	0	0	0	1	0	0
cyclohexane, air	0	0	0	1	0	0	chromium VI, air	0	0	0	1	0	0	CFC-114, air	0	0	0	1	0	0	Ethane, air	0	0	0	1	0	0	0	0	0	0	1	0	0
Dichlorine monoxide, air	0	0	0	1	0	0	COD, air	0	0	0	1	0	0	Chlorine, air	0	0	0	1	0	0	ethanol, air	0	0	0	1	0	0	0	0	0	0	1	0	0
Ethane, air	0	0	0	1	0	0	cyclohexane, air	0	0	0	1	0	0	chlorodifluoromethane, air	0	0	0	1	0	0	Ethylene, air	0	0	0	1	0	0	0	0	0	0	1	0	0
ethanol, air	0	0	0	1	0	0	Dichlorine monoxide, air	0	0	0	1	0	0	chromium, air	0	0	0	1	0	0	Ethylene carbonate, air	0	0	0	1	0	0	0	0	0	0	1	0	0
Ethylene, air	0	0	0	1	0	0	Ethane, air	0	0	0	1	0	0	chromium VI, air	0	0	0	1	0	0	Ethylene oxide, air	0	0	0	1	0	0	0	0	0	0	1	0	0
Ethylene carbonate, air	0	0	0	1	0	0	ethanol, air	0	0	0	1	0	0	COD, air	0	0	0	1	0	0	formaldehyde, air	0	0	0	1	0	0	0	0	0	0	1	0	0
Ethylene oxide, air	0	0	0	1	0	0	Ethylene, air	0	0	0	1	0	0	cyclohexane, air	0	0	0	1	0	0	gas from explosives, air	0	0	0	1	0	0	0	0	0	0	1	0	0
formaldehyde, air	0	0	0	1	0	0	Ethylene carbonate, air	0	0	0	1	0	0	Dichlorine monoxide, air	0	0	0	1	0	0	heptane, air	0	0	0	1	0	0	0	0	0	0	1	0	0
gas from explosives, air	0	0	0	1	0	0	Ethylene oxide, air	0	0	0	1	0	0	Ethane, air	0	0	0	1	0	0	Hexene, air	0	0	0	1	0	0	0	0	0	0	1	0	0
heptane, air	0	0	0	1	0	0	formaldehyde, air	0	0	0	1	0	0	ethanol, air	0	0	0	1	0	0	HFC-152a, air	0	0	0	1	0	0	0	0	0	0	1	0	0
Hexene, air	0	0	0	1	0	0	gas from explosives, air	0	0	0	1	0	0	Ethylene, air	0	0	0	1	0	0	High alkanes, air	0	0	0	1	0	0	0	0	0	0	1	0	0
HFC-152a, air	0	0	0	1	0	0	heptane, air	0	0	0	1	0	0	Ethylene carbonate, air	0	0	0	1	0	0	Hydrogen, air	0	0	0	1	0	0	0	0	0	0	1	0	0
High alkanes, air	0	0	0	1	0	0	Hexene, air	0	0	0	1	0	0	Ethylene oxide, air	0	0	0	1	0	0	Hydrogen fluoride, air	0	0	0	1	0	0	0	0	0	0	1	0	0
Hydrogen, air	0	0	0	1	0	0	HFC-152a, air	0	0	0	1	0	0	formaldehyde, air	0	0	0	1	0	0	Hydrogen sulfide, air	0	0	0	1	0	0	0	0	0	0	1	0	0
Hydrogen fluoride, air	0	0	0	1	0	0	High alkanes, air	0	0	0	1	0	0	gas from explosives, air	0	0	0	1	0	0	Hypochlorous acid, air	0	0	0	1	0	0	Ammonia, air	0	0	0	1	0	0
Hydrogen sulfide, air	0	0	0	1	0	0	Hydrogen, air	0	0	0	1	0	0	heptane, air	0	0	0	1	0	0	Isobutane, air	0	0	0	1	0	0	Argon, air	0	0	0	1	0	0
Hypochlorous acid, air	0	0	0	1	0	0	Hydrogen sulfide, air	0	0	0	1	0	0	Hexene, air	0	0	0	1	0	0	Isobutylene, air	0	0	0	1	0	0	Arsenic, air	0	0	0	1	0	0
Isobutane, air	0	0	0	1	0	0	Hypochlorous acid, air	0	0	0	1	0	0	HFC-152a, air	0	0	0	1	0	0	isoprene, air	0	0	0	1	0	0	beryllium, air	0	0	0	1	0	0
Isobutylene, air	0	0	0	1	0	0	Isobutane, air	0	0	0	1	0	0	High alkanes, air	0	0	0	1	0	0	lead, air	0	0	0	1	0	0	Boric acid, air	0	0	0	1	0	0
isoprene, air	0	0	0	1	0	0	Isobutylene, air	0	0	0	1	0	0	Hydrogen, air	0	0	0	1	0	0	Mercury, air	0	0	0	1	0	0	cadmium, air	0	0	0	1	0	0
lead, air	0	0	0	1	0	0	isoprene, air	0	0	0	1	0	0	Hydrogen fluoride, air	0	0	0	1	0	0	metals (unspecified), air	0	0	0	1	0	0	Carbon dioxide, air	0	0	0	1	0	0
Mercury, air	0	0	0	1	0	0	lead, air	0	0	0	1	0	0	Hydrogen sulfide, air	0	0	0	1	0	0	Methane, air	0	0	0	1	0	0	Carbon dioxide, biogenic, air	0	0	0	1	0	0
metals (unspecified), air	0	0	0	1	0	0	Mercury, air	0	0	0	1	0	0	Hypochlorous acid, air	0	0	0	1	0	0	methanol, air	0	0	0	1	0	0	carbon tetrachloride, air	0	0	0	1	0	0
methanol, air	0	0	0	1	0	0	metals (unspecified), air	0	0	0	1	0	0	Isobutane, air	0	0	0	1	0	0	methyl acetate, air	0	0	0	1	0	0	carbon tetrafluoride, air	0	0	0	1	0	0
methyl acetate, air	0	0	0	1	0	0	Methane, air	0	0	0	1	0	0	Isobutylene, air	0	0	0	1	0	0	Naphtha, air	0	0	0	1	0	0	CFC-11, air	0	0	0	1	0	0
Naphtha, air	0	0	0	1	0	0	methanol, air	0	0	0	1	0	0	isoprene, air	0	0	0	1	0	0	n-hexane, air	0	0	0	1	0	0	CFC-113, air	0	0	0	1	0	0
n-hexane, air	0	0	0	1	0	0	methyl acetate, air	0	0	0	1	0	0	lead, air	0	0	0	1	0	0	nickel, air	0	0	0	1	0	0	CFC-114, air	0	0	0	1	0	0
nickel, air	0	0	0	1	0	0	methyl bromide, air	0	0	0	1	0	0	Mercury, air	0	0	0	1	0	0	Nitric oxide, air	0	0	0	1	0	0	chlorodifluoromethane, air	0	0	0	1	0	0
Nitric oxide, air	0	0	0	1	0	0	methyl chloride, air	0	0	0	1	0	0	metals (unspecified), air	0	0	0	1	0	0	Nitrogen dioxide, air	0	0	0	1	0	0	chromium, air	0	0	0	1	0	0
Nitrogen dioxide, air	0	0	0	1	0	0	Methyl chloroform, air	0	0	0	1	0	0	Methane, air	0	0	0	1	0	0	nitrogen, atomic, air	0	0	0	1	0	0	chromium VI, air	0	0	0	1	0	0
nitrogen, atomic, air	0	0	0	1	0	0	Naphtha, air	0	0	0	1	0	0	methanol, air	0	0	0	1	0	0	Nitrous oxide, air	0	0	0	1	0	0	COD, air	0	0	0	1	0	0
NMVOC, air	0	0	0	1	0	0	n-hexane, air	0	0	0	1	0	0	methyl acetate, air	0	0	0	1	0	0	NMVOC, air	0	0	0	1	0	0	Dichlorine monoxide, air	0	0	0	1	0	0
NOx, air	0	0	0	1	0	0	nickel, air	0	0	0	1	0	0	methyl bromide, air	0	0	0	1	0	0	NOx, air	0	0	0	1	0	0	gas from explosives, air	0	0	0	1	0	0
n-Pentane, air	0	0	0	1	0	0	nitrogen, atomic, air	0	0	0	1	0	0	methyl chloride, air	0	0	0	1	0	0	n-Pentane, air	0	0	0	1	0	0	HFC-152a, air	0	0	0	1	0	0
Octane, air	0	0	0	1	0	0	Nitrous oxide, air	0	0	0	1	0	0	Methyl chloroform, air	0	0	0	1	0	0	Octane, air	0	0	0	1	0	0	Hydrogen, air	0	0	0	1	0	0
organic matter (unspecified), air	0	0	0	1	0	0	NMVOC, air	0	0	0	1	0	0	Naphtha, air	0	0	0	1	0	0	organic matter (unspecified), air	0	0	0	1	0	0	Hydrogen fluoride, air	0	0	0	1	0	0
Particulate matter, air	0	0	0	1	0	0	n-Pentane, air	0	0	0	1	0	0	n-hexane, air	0	0	0	1	0	0	Particulate matter, air	0	0	0	1	0	0	Hydrogen sulfide, air	0	0	0	1	0	0
particulate matter 2.5, air	0	0	0	1	0	0	Octane, air	0	0	0	1	0	0	nickel, air	0	0	0	1	0	0	particulate matter 2.5, air	0	0	0	1	0	0	lead, air	0	0	0	1	0	0
perfluoroethane, air	0	0	0	1	0	0	organic matter (unspecified), air	0	0	0	1	0	0	Nitrous oxide, air	0	0	0	1	0	0	perfluoroethane, air	0	0	0	1	0	0	Mercury, air	0	0	0	1	0	0
PM10, air	0	0	0	1	0	0	Particulate matter, air	0	0	0	1	0	0	NMVOC, air	0	0	0	1	0	0	PM10, air	0	0	0	1	0	0	metals (unspecified), air	0	0	0	1	0	0
Propane, air	0	0	0	1	0	0	particulate matter 2.5, air	0	0	0	1	0	0	n-Pentane, air	0	0	0	1	0	0	Propane, air	0	0	0	1	0	0	nickel, air	0	0	0	1	0	0
Propylene, air	0	0	0	1	0	0	perfluoroethane, air	0	0	0	1	0	0	Octane, air	0	0	0	1	0	0	Propylene, air	0	0	0	1	0	0	nitrogen, atomic, air	0	0	0	1	0	0
Propylene oxide, air	0	0	0	1	0	0	PM10, air	0	0	0	1	0	0	organic matter (unspecified), air	0	0	0	1	0	0	Propylene oxide, air	0	0	0	1	0	0	Nitrous oxide, air	0	0	0	1	0	0
Propyne, air	0	0	0	1	0	0	Propane, air	0	0	0	1	0	0	Particulate matter, air	0	0	0	1	0	0	Propyne, air	0	0	0	1	0	0	organic matter (unspecified), air	0	0	0	1	0	0
pyrolysis gas, air	0	0	0	1	0	0	Propylene, air	0	0	0	1	0	0	particulate matter 2.5, air	0	0	0	1	0	0	pyrolysis gas, air	0	0	0	1	0	0	Particulate matter, air	0	0	0	1	0	0
silver, air	0	0	0	1	0	0	Propylene oxide, air	0	0	0	1	0	0	perfluoroethane, air	0	0	0	1	0	0	silver, air	0	0	0	1	0	0	particulate matter 2.5, air	0	0	0	1	0	0
Sodium chlorate, air	0	0	0	1	0	0	Propyne, air	0	0	0	1	0	0	PM10, air	0	0	0	1	0	0	Sodium chlorate, air	0	0	0	1	0	0	perfluoroethane, air	0	0	0	1	0	0
Sodium sulfate, air	0	0	0	1	0	0	pyrolysis gas, air	0	0	0	1	0	0	Propane, air	0	0	0	1	0	0	Sodium sulfate, air	0	0	0	1	0	0	PM10, air	0	0	0	1	0	0
SOx, air	0	0	0	1	0	0	silver, air	0	0	0	1	0	0	Propylene, air	0	0	0	1	0	0	SOx, air	0	0	0	1	0	0	silver, air	0	0	0	1	0	0
Sulfur, air	0	0	0	1	0	0	Sodium chlorate, air	0	0	0	1	0	0	Propylene oxide, air	0	0	0	1	0	0	Sulfur, air	0	0	0	1	0	0	Sodium chlorate, air	0	0	0	1	0	0
sulfur dioxide, air	0	0	0	1	0	0	Sodium sulfate, air	0	0	0	1	0	0	Propyne, air	0	0	0	1	0	0	sulfur dioxide, air	0	0	0	1	0	0	Sodium sulfate, air	0	0	0	1	0	0
Sulfur hexafluoride, air	0	0	0	1	0	0	Sulfur, air	0	0	0	1	0	0	pyrolysis gas, air	0	0	0	1	0	0	Sulfur hexafluoride, air	0	0	0	1	0	0	SOx, air	0	0	0	1	0	0
Sulfur trioxide, air	0	0	0	1	0	0	Sulfur hexafluoride, air	0	0	0	1	0	0	silver, air	0	0	0	1	0	0	Sulfur trioxide, air	0	0	0	1	0	0	Sulfur, air	0	0	0	1	0	0
tert-butanol, air	0	0	0	1	0	0	tert-butanol, air	0	0	0	1	0	0	Sodium chlorate, air	0	0	0	1	0	0	tert-butanol, air	0	0	0	1	0	0	sulfur dioxide, air	0	0	0	1	0	0
toluene, air	0	0	0	1	0	0	toluene, air	0	0	0	1	0	0	Sodium sulfate, air	0	0	0	1	0	0	toluene, air	0	0	0	1	0	0	Sulfur hexafluoride, air	0	0	0	1	0	0
Urea, air	0	0	0	1	0	0	Urea, air	0	0	0	1	0	0	SOx, air	0	0	0	1	0	0	Urea, air	0	0	0	1	0	0	Sulfur trioxide, air	0	0	0	1	0	0
Vinylacetylene, air	0	0	0	1	0	0	Vinylacetylene, air	0	0	0	1	0	0	Sulfur, air	0	0	0	1	0	0	Vinylacetylene, air	0	0	0	1	0	0	Urea, air	0	0	0	1	0	0
VOCs (unspecified), air	0	0	0	1	0	0	VOCs (unspecified), air	0	0	0	1	0	0	sulfur dioxide, air	0	0	0	1	0	0	VOCs (unspecified), air	0	0	0	1	0	0	VOCs (unspecified), air	0	0	0	1	0	0
Zinc, air	0	0	0	1	0	0	Zinc, air	0	0	0	1	0	0	Sulfur hexafluoride, air	0	0	0	1	0	0	Zinc, air	0	0	0	1	0	0	Zinc, air	0	0	0	1	0	0
1-Pentene, liquid	0	0	0	1	0	0	1-Pentene, liquid	0	0	0	1	0	0	Sulfur trioxide, air	0	0	0	1	0	0	1-Pentene, liquid	0	0	0	1	0	0	1-Pentene, liquid	0	0	0	1	0	0
Acetaldehyde, liquid	0	0	0	1	0	0	Acetaldehyde, liquid	0	0	0	1	0	0	tert-butanol, air	0	0	0	1	0	0	Acetaldehyde, liquid	0	0	0	1	0	0	Acetaldehyde, liquid	0	0	0	1	0	0
acetic acid, liquid	0	0	0	1	0	0	acetic acid, liquid	0	0	0	1	0	0	toluene, air	0	0	0	1	0	0	acetic acid, liquid	0	0	0	1	0	0	acetic acid, liquid	0	0	0	1	0	0
Ammonia, liquid	0	0	0	1	0	0	Ammonia, liquid	0	0	0	1	0	0	Urea, air	0	0	0	1	0	0	Ammonia, liquid	0	0	0	1	0	0	Ammonia, liquid	0	0	0	1	0	0
ammonium as N, liquid	0	0	0	1	0	0	ammonium as N, liquid	0	0	0	1	0	0	Vinylacetylene, air	0	0	0	1	0	0	ammonium as N, liquid	0	0	0	1	0	0	ammonium as N, liquid	0	0	0	1	0	0
Arsenic, liquid	0	0	0	1	0	0	Arsenic, liquid	0	0	0	1	0	0	VOCs (unspecified), air	0	0	0	1	0	0	Arsenic, liquid	0	0	0	1	0	0	Arsenic, liquid	0	0	0	1	0	0
barium, liquid	0	0	0	1	0	0	barium, liquid	0	0	0	1	0	0	Zinc, air	0	0	0	1	0	0	barium, liquid	0	0	0	1	0	0	barium, liquid	0	0	0	1	0	0
Benzene, liquid	0	0	0	1	0	0	Benzene, liquid	0	0	0	1	0	0	1-Pentene, liquid	0	0	0	1	0	0	Benzene, liquid	0	0	0	1	0	0	Benzene, liquid	0	0	0	1	0	0
BOD, liquid	0	0	0	1	0	0	BOD, liquid	0	0	0	1	0	0	Acetaldehyde, liquid	0	0	0	1	0	0	BOD, liquid	0	0	0	1	0	0	BOD, liquid	0	0	0	1	0	0
BOD5, liquid	0	0	0	1	0	0	BOD5, liquid	0	0	0	1	0	0	acetic acid, liquid	0	0	0	1	0	0	BOD5, liquid	0	0	0	1	0	0	BOD5, liquid	0	0	0	1	0	0
Boron, liquid	0	0	0	1	0	0	Boron, liquid	0	0	0	1	0	0	Arsenic, liquid	0	0	0	1	0	0	Boron, liquid	0	0	0	1	0	0	Boron, liquid	0	0	0	1	0	0
Carbon dioxide, liquid	0	0	0	1	0	0	Carbon dioxide, liquid	0	0	0	1	0	0	barium, liquid	0	0	0	1	0	0	Carbon dioxide, liquid	0	0	0	1	0	0	Carbon dioxide, liquid	0	0	0	1	0	0
Carbon monoxide, liquid	0	0	0	1	0	0	Carbon monoxide, liquid	0	0	0	1	0	0	Benzene, liquid	0	0	0	1	0	0	Carbon monoxide, liquid	0	0	0	1	0	0	Carbon monoxide, liquid	0	0	0	1	0	0
cellulose, liquid	0	0	0	1	0	0	cellulose, liquid	0	0	0	1	0	0	Boron, liquid	0	0	0	1	0	0	cellulose, liquid	0	0	0	1	0	0	cellulose, liquid	0	0	0	1	0	0
Chloride, liquid	0	0	0	1	0	0	Chloride, liquid	0	0	0	1	0	0	Carbon dioxide, liquid	0	0	0	1	0	0	Chloride, liquid	0	0	0	1	0	0	Chloride, liquid	0	0	0	1	0	0
Chlorine, liquid	0	0	0	1	0	0	Chlorine, liquid	0	0	0	1	0	0	Carbon monoxide, liquid	0	0	0	1	0	0	Chlorine, liquid	0	0	0	1	0	0	Chlorine, liquid	0	0	0	1	0	0
Chlorine dioxide, liquid	0	0	0	1	0	0	Chlorine dioxide, liquid	0	0	0	1	0	0	cellulose, liquid	0	0	0	1	0	0	Chlorine dioxide, liquid	0	0	0	1	0	0	Chlorine dioxide, liquid	0	0	0	1	0	0
chromium, liquid	0	0	0	1	0	0	chromium, liquid	0	0	0	1	0	0	Chloride, liquid	0	0	0	1	0	0	chromium, liquid	0	0	0	1	0	0	chromium, liquid	0	0	0	1	0	0
Chromium III, liquid	0	0	0	1	0	0	Chromium III, liquid	0	0	0	1	0	0	Chlorine, liquid	0	0	0	1	0	0	Chromium III, liquid	0	0	0	1	0	0	Chromium III, liquid	0	0	0	1	0	0
Chromium VI, liquid	0	0	0	1	0	0	Chromium VI, liquid	0	0	0	1	0	0	Chlorine dioxide, liquid	0	0	0	1	0	0	Chromium VI, liquid	0	0	0	1	0	0	Chromium VI, liquid	0	0	0	1	0	0
COD, liquid	0	0	0	1	0	0	COD, liquid	0	0	0	1	0	0	chromium, liquid	0	0	0	1	0	0	COD, liquid	0	0	0	1	0	0	COD, liquid	0	0	0	1	0	0
diammonium phosphate (DAP), liquid	0	0	0	1	0	0	diammonium phosphate (DAP), liquid	0	0	0	1	0	0	Chromium III, liquid	0	0	0	1	0	0	diammonium phosphate (DAP), liquid	0	0	0	1	0	0	diammonium phosphate (DAP), liquid	0	0	0	1	0	0
dimethyl ether, liquid	0	0	0	1	0	0	dimethyl ether, liquid	0	0	0	1	0	0	Chromium VI, liquid	0	0	0	1	0	0	dimethyl ether, liquid	0	0	0	1	0	0	dimethyl ether, liquid	0	0	0	1	0	0
ethanecarboxylic acid, liquid	0	0	0	1	0	0	ethanecarboxylic acid, liquid	0	0	0	1	0	0	diammonium phosphate (DAP), liquid	0	0	0	1	0	0	ethanecarboxylic acid, liquid	0	0	0	1	0	0	ethanecarboxylic acid, liquid	0	0	0	1	0	0
ethanol, liquid	0	0	0	1	0	0	ethanol, liquid	0	0	0	1	0	0	dimethyl ether, liquid	0	0	0	1	0	0	ethanol, liquid	0	0	0	1	0	0	ethanol, liquid	0	0	0	1	0	0
ethyl butanol, liquid	0	0	0	1	0	0	ethyl butanol, liquid	0	0	0	1	0	0	ethanecarboxylic acid, liquid	0	0	0	1	0	0	ethyl butanol, liquid	0	0	0	1	0	0	ethyl butanol, liquid	0	0	0	1	0	0
ethylene glycol, liquid	0	0	0	1	0	0	ethylene glycol, liquid	0	0	0	1	0	0	ethanol, liquid	0	0	0	1	0	0	ethylene glycol, liquid	0	0	0	1	0	0	ethylene glycol, liquid	0	0	0	1	0	0
Ethylene Glycol, Tri, liquid	0	0	0	1	0	0	Ethylene Glycol, Tri, liquid	0	0	0	1	0	0	ethyl butanol, liquid	0	0	0	1	0	0	Ethylene Glycol, Tri, liquid	0	0	0	1	0	0	Ethylene Glycol, Tri, liquid	0	0	0	1	0	0
grease / oil, liquid	0	0	0	1	0	0	grease / oil, liquid	0	0	0	1	0	0	ethylene glycol, liquid	0	0	0	1	0	0	grease / oil, liquid	0	0	0	1	0	0	grease / oil, liquid	0	0	0	1	0	0
Hexene, liquid	0	0	0	1	0	0	Hexene, liquid	0	0	0	1	0	0	Ethylene Glycol, Tri, liquid	0	0	0	1	0	0	Hexene, liquid	0	0	0	1	0	0	Hexene, liquid	0	0	0	1	0	0
Higher Glycols, liquid	0	0	0	1	0	0	Higher Glycols, liquid	0	0	0	1	0	0	grease / oil, liquid	0	0	0	1	0	0	Higher Glycols, liquid	0	0	0	1	0	0	Higher Glycols, liquid	0	0	0	1	0	0
Hydrogen, liquid	0	0	0	1	0	0	Hydrogen, liquid	0	0	0	1	0	0	Hexene, liquid	0	0	0	1	0	0	Hydrogen, liquid	0	0	0	1	0	0	Hydrogen, liquid	0	0	0	1	0	0
Hydrogen chloride, liquid	0	0	0	1	0	0	Hydrogen chloride, liquid	0	0	0	1	0	0	Higher Glycols, liquid	0	0	0	1	0	0	Hydrogen chloride, liquid	0	0	0	1	0	0	Hydrogen chloride, liquid	0	0	0	1	0	0
hydrogen peroxide, liquid	0	0	0	1	0	0	hydrogen peroxide, liquid	0	0	0	1	0	0	Hydrogen, liquid	0	0	0	1	0	0	hydrogen peroxide, liquid	0	0	0	1	0	0	hydrogen peroxide, liquid	0	0	0	1	0	0
hydroxypropyl cellulose, liquid	0	0	0	1	0	0	hydroxypropyl cellulose, liquid	0	0	0	1	0	0	Hydrogen chloride, liquid	0	0	0	1	0	0	hydroxypropyl cellulose, liquid	0	0	0	1	0	0	hydroxypropyl cellulose, liquid	0	0	0	1	0	0
Iron (Fe++, Fe3+), liquid	0	0	0	1	0	0	Iron (Fe++, Fe3+), liquid	0	0	0	1	0	0	hydrogen peroxide, liquid	0	0	0	1	0	0	Iron (Fe++, Fe3+), liquid	0	0	0	1	0	0	Iron (Fe++, Fe3+), liquid	0	0	0	1	0	0
lead, liquid	0	0	0	1	0	0	lead, liquid	0	0	0	1	0	0	hydroxypropyl cellulose, liquid	0	0	0	1	0	0	lead, liquid	0	0	0	1	0	0	lead, liquid	0	0	0	1	0	0
methanol, liquid	0	0	0	1	0	0	methanol, liquid	0	0	0	1	0	0	Iron (Fe++, Fe3+), liquid	0	0	0	1	0	0	methanol, liquid	0	0	0	1	0	0	methanol, liquid	0	0	0	1	0	0
methyl acetate, liquid	0	0	0	1	0	0	methyl acetate, liquid	0	0	0	1	0	0	lead, liquid	0	0	0	1	0	0	methyl acetate, liquid	0	0	0	1	0	0	methyl acetate, liquid	0	0	0	1	0	0
Methyl iodide, liquid	0	0	0	1	0	0	Methyl iodide, liquid	0	0	0	1	0	0	methanol, liquid	0	0	0	1	0	0	Methyl iodide, liquid	0	0	0	1	0	0	Methyl iodide, liquid	0	0	0	1	0	0
Mobile ions, liquid	0	0	0	1	0	0	Mobile ions, liquid	0	0	0	1	0	0	methyl acetate, liquid	0	0	0	1	0	0	Mobile ions, liquid	0	0	0	1	0	0	Mobile ions, liquid	0	0	0	1	0	0
n-hexane, liquid	0	0	0	1	0	0	n-hexane, liquid	0	0	0	1	0	0	Methyl iodide, liquid	0	0	0	1	0	0	n-hexane, liquid	0	0	0	1	0	0	n-hexane, liquid	0	0	0	1	0	0
nickel, liquid	0	0	0	1	0	0	nickel, liquid	0	0	0	1	0	0	Mobile ions, liquid	0	0	0	1	0	0	nickel, liquid	0	0	0	1	0	0	nickel, liquid	0	0	0	1	0	0
nitrogen, atomic, liquid	0	0	0	1	0	0	nitrogen, atomic, liquid	0	0	0	1	0	0	n-hexane, liquid	0	0	0	1	0	0	nitrogen, atomic, liquid	0	0	0	1	0	0	nitrogen, atomic, liquid	0	0	0	1	0	0
n-Pentane, liquid	0	0	0	1	0	0	n-Pentane, liquid	0	0	0	1	0	0	nickel, liquid	0	0	0	1	0	0	n-Pentane, liquid	0	0	0	1	0	0	n-Pentane, liquid	0	0	0	1	0	0
Phosphorus emission, liquid	0	0	0	1	0	0	Phosphorus emission, liquid	0	0	0	1	0	0	n-Pentane, liquid	0	0	0	1	0	0	Phosphorus emission, liquid	0	0	0	1	0	0	Phosphorus emission, liquid	0	0	0	1	0	0
Propane, liquid	0	0	0	1	0	0	Propane, liquid	0	0	0	1	0	0	Propane, liquid	0	0	0	1	0	0	Propane, liquid	0	0	0	1	0	0	Propane, liquid	0	0	0	1	0	0
Propylene, liquid	0	0	0	1	0	0	Propylene, liquid	0	0	0	1	0	0	Propylene, liquid	0	0	0	1	0	0	Propylene, liquid	0	0	0	1	0	0	Propylene, liquid	0	0	0	1	0	0
Propylene Chlorohydrin, liquid	0	0	0	1	0	0	Propylene Chlorohydrin, liquid	0	0	0	1	0	0	Propylene Chlorohydrin, liquid	0	0	0	1	0	0	Propylene Chlorohydrin, liquid	0	0	0	1	0	0	Propylene Chlorohydrin, liquid	0	0	0	1	0	0
Propylene glycol, liquid	0	0	0	1	0	0	Propylene glycol, liquid	0	0	0	1	0	0	Propylene glycol, liquid	0	0	0	1	0	0	Propylene glycol, liquid	0	0	0	1	0	0	Propylene glycol, liquid	0	0	0	1	0	0
Propylene oxide, liquid	0	0	0	1	0	0	Propylene oxide, liquid	0	0	0	1	0	0	Propylene oxide, liquid	0	0	0	1	0	0	Propylene oxide, liquid	0	0	0	1	0	0	Propylene oxide, liquid	0	0	0	1	0	0
pyrolysis gas, liquid	0	0	0	1	0	0	pyrolysis gas, liquid	0	0	0	1	0	0	pyrolysis gas, liquid	0	0	0	1	0	0	pyrolysis gas, liquid	0	0	0	1	0	0	pyrolysis gas, liquid	0	0	0	1	0	0
Rh-Complex, liquid	0	0	0	1	0	0	Rh-Complex, liquid	0	0	0	1	0	0	Rh-Complex, liquid	0	0	0	1	0	0	Rh-Complex, liquid	0	0	0	1	0	0	Rh-Complex, liquid	0	0	0	1	0	0
silver, liquid	0	0	0	1	0	0	silver, liquid	0	0	0	1	0	0	silver, liquid	0	0	0	1	0	0	silver, liquid	0	0	0	1	0	0	silver, liquid	0	0	0	1	0	0
sodium acetate, liquid	0	0	0	1	0	0	sodium acetate, liquid	0	0	0	1	0	0	sodium acetate, liquid	0	0	0	1	0	0	sodium acetate, liquid	0	0	0	1	0	0	sodium acetate, liquid	0	0	0	1	0	0
Sodium chlorate, liquid	0	0	0	1	0	0	Sodium chlorate, liquid	0	0	0	1	0	0	Sodium chlorate, liquid	0	0	0	1	0	0	Sodium chlorate, liquid	0	0	0	1	0	0	Sodium chlorate, liquid	0	0	0	1	0	0
Sodium hypochlorite, liquid	0	0	0	1	0	0	Sodium hypochlorite, liquid	0	0	0	1	0	0	Sodium hypochlorite, liquid	0	0	0	1	0	0	Sodium hypochlorite, liquid	0	0	0	1	0	0	Sodium hypochlorite, liquid	0	0	0	1	0	0
sodium ion, liquid	0	0	0	1	0	0	sodium ion, liquid	0	0	0	1	0	0	sodium ion, liquid	0	0	0	1	0	0	sodium ion, liquid	0	0	0	1	0	0	sodium ion, liquid	0	0	0	1	0	0
Sodium sulfate, liquid	0	0	0	1	0	0	Sodium sulfate, liquid	0	0	0	1	0	0	Sodium sulfate, liquid	0	0	0	1	0	0	Sodium sulfate, liquid	0	0	0	1	0	0	Sodium sulfate, liquid	0	0	0	1	0	0
Solids, inorganic, liquid	0	0	0	1	0	0	Solids, inorganic, liquid	0	0	0	1	0	0	Solids, inorganic, liquid	0	0	0	1	0	0	Solids, inorganic, liquid	0	0	0	1	0	0	Solids, inorganic, liquid	0	0	0	1	0	0
TDS, liquid	0	0	0	1	0	0	TDS, liquid	0	0	0	1	0	0	TDS, liquid	0	0	0	1	0	0	TDS, liquid	0	0	0	1	0	0	TDS, liquid	0	0	0	1	0	0
tert-butanol, liquid	0	0	0	1	0	0	tert-butanol, liquid	0	0	0	1	0	0	tert-butanol, liquid	0	0	0	1	0	0	tert-butanol, liquid	0	0	0	1	0	0	tert-butanol, liquid	0	0	0	1	0	0
Zinc, liquid	0	0	0	1	0	0	Zinc, liquid	0	0	0	1	0	0	Zinc, liquid	0	0	0	1	0	0	Zinc, liquid	0	0	0	1	0	0	Zinc, liquid	0	0	0	1	0	0
ARSENIC(V), solid	0	0	0	1	0	0	ARSENIC(V), solid	0	0	0	1	0	0	ARSENIC(V), solid	0	0	0	1	0	0	ARSENIC(V), solid	0	0	0	1	0	0	ARSENIC(V), solid	0	0	0	1	0	0
Boric acid, solid	0	0	0	1	0	0	Boric acid, solid	0	0	0	1	0	0	Boric acid, solid	0	0	0	1	0	0	Boric acid, solid	0	0	0	1	0	0	Boric acid, solid	0	0	0	1	0	0
Calcium carbonate, solid	0	0	0	1	0	0	Calcium carbonate, solid	0	0	0	1	0	0	Calcium carbonate, solid	0	0	0	1	0	0	Calcium carbonate, solid	0	0	0	1	0	0	Calcium carbonate, solid	0	0	0	1	0	0
calcium monoxide, solid	0	0	0	1	0	0	calcium monoxide, solid	0	0	0	1	0	0	calcium monoxide, solid	0	0	0	1	0	0	calcium monoxide, solid	0	0	0	1	0	0	calcium monoxide, solid	0	0	0	1	0	0
Calcium sulfate, solid	0	0	0	1	0	0	Calcium sulfate, solid	0	0	0	1	0	0	Calcium sulfate, solid	0	0	0	1	0	0	Calcium sulfate, solid	0	0	0	1	0	0	Calcium sulfate, solid	0	0	0	1	0	0
Clay, solid	0	0	0	1	0	0	Clay, solid	0	0	0	1	0	0	Clay, solid	0	0	0	1	0	0	Clay, solid	0	0	0	1	0	0	Clay, solid	0	0	0	1	0	0
hazardous waste, solid	0	0	0	1	0	0	hazardous waste, solid	0	0	0	1	0	0	hazardous waste, solid	0	0	0	1	0	0	hazardous waste, solid	0	0	0	1	0	0	hazardous waste, solid	0	0	0	1	0	0
Hydrogen fluoride, solid	0	0	0	1	0	0	Hydrogen fluoride, solid	0	0	0	1	0	0	Hydrogen fluoride, solid	0	0	0	1	0	0	Hydrogen fluoride, solid	0	0	0	1	0	0	Hydrogen fluoride, solid	0	0	0	1	0	0
Impurities, solid	0	0	0	1	0	0	Impurities, solid	0	0	0	1	0	0	Impurities, solid	0	0	0	1	0	0	Impurities, solid	0	0	0	1	0	0	Impurities, solid	0	0	0	1	0	0
lead, solid	0	0	0	1	0	0	lead, solid	0	0	0	1	0	0	lead, solid	0	0	0	1	0	0	lead, solid	0	0	0	1	0	0	lead, solid	0	0	0	1	0	0
Magnesium hydroxide, solid	0	0	0	1	0	0	Magnesium hydroxide, solid	0	0	0	1	0	0	Magnesium hydroxide, solid	0	0	0	1	0	0	Magnesium hydroxide, solid	0	0	0	1	0	0	Magnesium hydroxide, solid	0	0	0	1	0	0
Mercury, solid	0	0	0	1	0	0	Mercury, solid	0	0	0	1	0	0	Mercury, solid	0	0	0	1	0	0	Mercury, solid	0	0	0	1	0	0	Mercury, solid	0	0	0	1	0	0
Mud, solid	0	0	0	1	0	0	Mud, solid	0	0	0	1	0	0	Mud, solid	0	0	0	1	0	0	Mud, solid	0	0	0	1	0	0	Mud, solid	0	0	0	1	0	0
phosphate ore, in ground, solid	0	0	0	1	0	0	phosphate ore, in ground, solid	0	0	0	1	0	0	phosphate ore, in ground, solid	0	0	0	1	0	0	phosphate ore, in ground, solid	0	0	0	1	0	0	phosphate ore, in ground, solid	0	0	0	1	0	0
Phosphate rock (pure), solid	0	0	0	1	0	0	Phosphate rock (pure), solid	0	0	0	1	0	0	Phosphate rock (pure), solid	0	0	0	1	0	0	Phosphate rock (pure), solid	0	0	0	1	0	0	Phosphate rock (pure), solid	0	0	0	1	0	0
Phosphogypsum, solid	0	0	0	1	0	0	Phosphogypsum, solid	0	0	0	1	0	0	Phosphogypsum, solid	0	0	0	1	0	0	Phosphogypsum, solid	0	0	0	1	0	0	Phosphogypsum, solid	0	0	0	1	0	0
Phosphoric acid, solid	0	0	0	1	0	0	Phosphoric acid, solid	0	0	0	1	0	0	Phosphoric acid, solid	0	0	0	1	0	0	Phosphoric acid, solid	0	0	0	1	0	0	Phosphoric acid, solid	0	0	0	1	0	0
Silica, solid	0	0	0	1	0	0	Silica, solid	0	0	0	1	0	0	Silica, solid	0	0	0	1	0	0	Silica, solid	0	0	0	1	0	0	Silica, solid	0	0	0	1	0	0
Sodium chloride, solid	0	0	0	1	0	0	Sodium chloride, solid	0	0	0	1	0	0	Sodium chloride, solid	0	0	0	1	0	0	Sodium chloride, solid	0	0	0	1	0	0	Sodium chloride, solid	0	0	0	1	0	0
Solid waste, solid	0	0	0	1	0	0	Solid waste, solid	0	0	0	1	0	0	Solid waste, solid	0	0	0	1	0	0	Solid waste, solid	0	0	0	1	0	0	Solid waste, solid	0	0	0	1	0	0
Sulfuric acid, solid	0	0	0	1	0	0	Sulfuric acid, solid	0	0	0	1	0	0	Sulfuric acid, solid	0	0	0	1	0	0	Sulfuric acid, solid	0	0	0	1	0	0	Sulfuric acid, solid	0	0	0	1	0	0
suspended matter (unspecified), solid	0	0	0	1	0	0	suspended matter (unspecified), solid	0	0	0	1	0	0	suspended matter (unspecified), solid	0	0	0	1	0	0	suspended matter (unspecified), solid	0	0	0	1	0	0	suspended matter (unspecified), solid	0	0	0	1	0	0
thallium, solid	0	0	0	1	0	0	thallium, solid	0	0	0	1	0	0	thallium, solid	0	0	0	1	0	0	thallium, solid	0	0	0	1	0	0	thallium, solid	0	0	0	1	0	0
tincal (borax), solid	0	0	0	1	0	0	tincal (borax), solid	0	0	0	1	0	0	tincal (borax), solid	0	0	0	1	0	0	tincal (borax), solid	0	0	0	1	0	0	tincal (borax), solid	0	0	0	1	0	0
Vanadium, solid	0	0	0	1	0	0	Vanadium, solid	0	0	0	1	0	0	Vanadium, solid	0	0	0	1	0	0	Vanadium, solid	0	0	0	1	0	0	Vanadium, solid	0	0	0	1	0	0
Total raw materials, raw material	0	0	0	1	0	0	Total raw materials, raw material	0	0	0	1	0	0	Total raw materials, raw material	0	0	0	1	0	0	Total raw materials, raw material	0	0	0	1	0	0	Total raw materials, raw material	0	0	0	1	0	0
0	0	0	0	1	0	0	0	0	0	0	1	0	0	0	0	0	0	1	0	0	0	0	0	0	1	0	0	0	0	0	0	1	0	0
0	0	0	0	1	0	0	0	0	0	0	1	0	0	0	0	0	0	1	0	0	0	0	0	0	1	0	0	0	0	0	0	1	0	0
0	0	0	0	1	0	0	0	0	0	0	1	0	0	0	0	0	0	1	0	0	0	0	0	0	1	0	0	0	0	0	0	1	0	0
0	0	0	0	1	0	0	0	0	0	0	1	0	0	0	0	0	0	1	0	0	0	0	0	0	1	0	0	0	0	0	0	1	0	0
0	0	0	0	1	0	0	0	0	0	0	1	0	0	0	0	0	0	1	0	0	0	0	0	0	1	0	0	0	0	0	0	1	0	0
0	0	0	0	1	0	0	0	0	0	0	1	0	0	0	0	0	0	1	0	0	0	0	0	0	1	0	0	0	0	0	0	1	0	0
name, air	0	0	0	1	0	0	name, air	0	0	0	1	0	0	name, air	0	0	0	1	0	0	name, air	0	0	0	1	0	0	name, air	0	0	0	1	0	0
Total Air emissions, air	0	0	0	1	0	0	Total Air emissions, air	0	0	0	1	0	0	Total Air emissions, air	0	0	0	1	0	0	Total Air emissions, air	0	0	0	1	0	0	Total Air emissions, air	0	0	0	1	0	0
0	0	0	0	1	0	0	0	0	0	0	1	0	0	0	0	0	0	1	0	0	0	0	0	0	1	0	0	0	0	0	0	1	0	0
0	0	0	0	1	0	0	0	0	0	0	1	0	0	0	0	0	0	1	0	0	0	0	0	0	1	0	0	0	0	0	0	1	0	0
name, liquid	0	0	0	1	0	0	name, liquid	0	0	0	1	0	0	name, liquid	0	0	0	1	0	0	name, liquid	0	0	0	1	0	0	name, liquid	0	0	0	1	0	0
Total Water emissions, liquid	0	0	0	1	0	0	Total Water emissions, liquid	0	0	0	1	0	0	Total Water emissions, liquid	0	0	0	1	0	0	Total Water emissions, liquid	0	0	0	1	0	0	Total Water emissions, liquid	0	0	0	1	0	0
0	0	0	0	1	0	0	0	0	0	0	1	0	0	0	0	0	0	1	0	0	0	0	0	0	1	0	0	0	0	0	0	1	0	0
0	0	0	0	1	0	0	0	0	0	0	1	0	0	0	0	0	0	1	0	0	0	0	0	0	1	0	0	0	0	0	0	1	0	0
solid	0	0	0	1	0	0	solid	0	0	0	1	0	0	solid	0	0	0	1	0	0	solid	0	0	0	1	0	0	solid	0	0	0	1	0	0
Total Solid emissions, solid	0	0	0	1	0	0	Total Solid emissions, solid	0	0	0	1	0	0	Total Solid emissions, solid	0	0	0	1	0	0	Total Solid emissions, solid	0	0	0	1	0	0	Total Solid emissions, solid	0	0	0	1	0	0

## Sheet: HPMCAS CT
Cradle to gate chemical tree for Hydroxypropyl methyl cellulose acetate succinate (HPMCAS)
Key	Natural resources	Unallocated	Allocated
Level 1	Level 2	Level 3	Level 4	Level 5	Level 6	Level 7	Level 8	Level 9	Level 10	Level 11	Level 12	Level 13	Level 14
HPMCAS	acetic acid	Carbon monoxide	Carbon dioxide	Natural gas	blue water
1000	260.249	136.891	68.3972	14.094	4.56062
					Natural gas (unprocessed)
					14.3759
				nitrogen from air	Air (untreated)
				26.3056	26.3057
				oxygen from air	Air (untreated)
				11.6774	11.6775
				Water for rxn	Water (untreated)
				18.2381	18.2381
			Natural gas	blue water
			46.1405	14.9304
				Natural gas (unprocessed)
				47.0633
			Water for rxn	Water (untreated)
			27.9271	27.9271
		methanol	Natural gas	blue water
		142.877	73.4989	23.7831
				Natural gas (unprocessed)
				74.9689
			oxygen from air	Air (untreated)
			73.4247	73.4248
			Water for rxn	Water (untreated)
			131.123	131.123
	acetic anhydride	acetic acid	Carbon monoxide	Carbon dioxide	Natural gas	blue water
	261.079	330.657	173.925	86.9013	17.907	5.79444
						Natural gas (unprocessed)
						18.2652
					nitrogen from air	Air (untreated)
					33.4223	33.4224
					oxygen from air	Air (untreated)
					14.8366	14.8367
					Water for rxn	Water (untreated)
					23.1723	23.1723
				Natural gas	blue water
				58.6233	18.9696
					Natural gas (unprocessed)
					59.7957
				Water for rxn	Water (untreated)
				35.4825	35.4825
			methanol	Natural gas	blue water
			181.53	93.3832	30.2174
					Natural gas (unprocessed)
					95.2509
				oxygen from air	Air (untreated)
				93.2889	93.289
				Water for rxn	Water (untreated)
				166.597	166.597
	Butanedioic Anhydride	Butyric acid lactone	1,4-butanediol	1,4-Butynediol	Acetylene	Natural gas	blue water
	175.993	0.457582	0.487869	0.493131	0.164048	0.299698	0.0969778
							Natural gas (unprocessed)
							0.305692
						Oxygen	Air (untreated)
						0.806298	0.806985
					formaldehyde	Ammonium Hydroxide	Ammonia	Natural gas	blue water
					0.401336	0.0086729	0.00421682	0.000868925	0.000281171
									Natural gas (unprocessed)
									0.000886304
								nitrogen from air	Air (untreated)
								0.00162179	0.0016218
								oxygen from air	Air (untreated)
								0.000719937	0.000719938
								Water for rxn	Water (untreated)
								0.00112442	0.00112442
							Water for rxn	Water (untreated)
							0.00445607	0.00445607
						methanol	Natural gas	blue water
						0.461305	0.237305	0.0767884
								Natural gas (unprocessed)
								0.242051
							oxygen from air	Air (untreated)
							0.237066	0.237066
							Water for rxn	Water (untreated)
							0.423357	0.423357
						oxygen from air	Air (untreated)
						0.271088	0.271089
						Water for rxn	Water (untreated)
						0.425768	0.425768
				Hydrogen	hydrogen from SMR natural gas	Methane	Natural gas	blue water
				0.0236884	0.0236884	0.0495977	0.050188	0.0162401
								Natural gas (unprocessed)
								0.0511918
						oxygen from air	Air (untreated)
						0.00879	0.00879001
						Water for rxn	Water (untreated)
						0.108057	0.108057
		Succinic acid	ethyl acetate	acetic acid	Carbon monoxide	Carbon dioxide	Natural gas	blue water
		214.113	53.5283	35.5326	18.6901	9.33848	1.9243	0.622675
								Natural gas (unprocessed)
								1.96279
							nitrogen from air	Air (untreated)
							3.59159	3.59159
							oxygen from air	Air (untreated)
							1.59436	1.59436
							Water for rxn	Water (untreated)
							2.49011	2.49011
						Natural gas	blue water
						6.2997	2.03849
							Natural gas (unprocessed)
							6.4257
						Water for rxn	Water (untreated)
						3.81298	3.81298
					methanol	Natural gas	blue water
					19.5074	10.035	3.24719
							Natural gas (unprocessed)
							10.2357
						oxygen from air	Air (untreated)
						10.0249	10.0249
						Water for rxn	Water (untreated)
						17.9027	17.9027
				ethanol	Corn	K in Fertilizer	Potassium chloride	Sylvinite ore	sylvinite ore (in ground)
				36.7616	59.4803	0.34098	0.684699	2.00772	2.00772
						N in fertilizer	Ammonia	Natural gas	blue water
						1.10039	0.71525	0.147386	0.0476918
									Natural gas (unprocessed)
									0.150333
								nitrogen from air	Air (untreated)
								0.275086	0.275086
								oxygen from air	Air (untreated)
								0.122115	0.122115
								Water for rxn	Water (untreated)
								0.190722	0.190722
							N in DAP	diammonium phosphate (DAP)	Ammonia	Natural gas	blue water
							0.108938	0.246466	0.0632925	0.0130422	0.00422024
											Natural gas (unprocessed)
											0.013303
										nitrogen from air	Air (untreated)
										0.0243423	0.0243424
										oxygen from air	Air (untreated)
										0.0108059	0.0108059
										Water for rxn	Water (untreated)
										0.016877	0.016877
									Phosphoric acid	Phosphate rock	phosphate ore, in ground
									0.182064	0.394745	1.37653
										Sulfuric acid	Sulfur trioxide	oxygen from air	Air (untreated)
										0.338353	0.274682	0.1706	0.1706
												Sulfur	oil (in ground)
												0.118451	0.122004
												Water for rxn	Water (untreated)
												0.0103427	0.0103427
											Water for rxn	Water (untreated)
											0.0687012	0.0687013
										Water for rxn	Water (untreated)
										0.106823	0.106823
							Urea	Ammonia	Natural gas	blue water
							0.878107	0.497184	0.102451	0.0331515
										Natural gas (unprocessed)
										0.1045
									nitrogen from air	Air (untreated)
									0.191218	0.191218
									oxygen from air	Air (untreated)
									0.0848842	0.0848843
									Water for rxn	Water (untreated)
									0.132574	0.132574
								Carbon dioxide	Natural gas	blue water
								0.642423	0.132379	0.0428358
										Natural gas (unprocessed)
										0.135026
									nitrogen from air	Air (untreated)
									0.247077	0.247077
									oxygen from air	Air (untreated)
									0.109681	0.109681
									Water for rxn	Water (untreated)
									0.171303	0.171303
						P in fertilizer	P in DAP	diammonium phosphate (DAP)	Ammonia	Natural gas	blue water
						0.217886	0.217886	0.492954	0.12659	0.0260854	0.00844086
											Natural gas (unprocessed)
											0.0266072
										nitrogen from air	Air (untreated)
										0.0486868	0.0486869
										oxygen from air	Air (untreated)
										0.0216128	0.0216128
										Water for rxn	Water (untreated)
										0.0337554	0.0337554
									Phosphoric acid	Phosphate rock	phosphate ore, in ground
									0.364145	0.789525	2.75319
										Sulfuric acid	Sulfur trioxide	oxygen from air	Air (untreated)
										0.676736	0.549388	0.341214	0.341214
												Sulfur	oil (in ground)
												0.236912	0.244019
												Water for rxn	Water (untreated)
												0.0206862	0.0206862
											Water for rxn	Water (untreated)
											0.137409	0.137409
										Water for rxn	Water (untreated)
										0.213655	0.213655
					Water for rxn	Water (untreated)
					3.82321	3.82321
			Hydrogen	hydrogen from SMR natural gas	Methane	Natural gas	blue water
			14.9879	14.9879	31.3809	31.7545	10.2753
							Natural gas (unprocessed)
							32.3896
					oxygen from air	Air (untreated)
					5.56152	5.56153
					Water for rxn	Water (untreated)
					68.369	68.369
			Maleic Acid	Maleic anhydride	Butane	blue water
			271.924	229.729	253.409	81.9994
						Natural gas (unprocessed)
						258.477
					oxygen from air	Air (untreated)
					1928	1928
				Water for rxn	Water (untreated)
				42.1949	42.1949
	HPMC 1p3DS 0p2 MS	cellulose	Dissolving pulp	biomass for pulp	blue water
	879.965	675.36	675.36	4784.06	3744.6
					N in DAP	diammonium phosphate (DAP)	Ammonia	Natural gas	blue water
					1.63264	3.69376	0.948556	0.195461	0.0632483
									Natural gas (unprocessed)
									0.19937
								nitrogen from air	Air (untreated)
								0.364816	0.364816
								oxygen from air	Air (untreated)
								0.161947	0.161947
								Water for rxn	Water (untreated)
								0.252933	0.252933
							Phosphoric acid	Phosphate rock	phosphate ore, in ground
							2.72858	5.916	20.63
								Sulfuric acid	Sulfur trioxide	oxygen from air	Air (untreated)
								5.07086	4.11662	2.55675	2.55676
										Sulfur	oil (in ground)
										1.77521	1.82846
										Water for rxn	Water (untreated)
										0.155004	0.155004
									Water for rxn	Water (untreated)
									1.02962	1.02962
								Water for rxn	Water (untreated)
								1.60094	1.60094
					P in DAP	diammonium phosphate (DAP)	Ammonia	Natural gas	blue water
					1.80115	4.07499	1.04646	0.215635	0.0697761
									Natural gas (unprocessed)
									0.219947
								nitrogen from air	Air (untreated)
								0.402468	0.402469
								oxygen from air	Air (untreated)
								0.178661	0.178662
								Water for rxn	Water (untreated)
								0.279038	0.279038
							Phosphoric acid	Phosphate rock	phosphate ore, in ground
							3.01019	6.52659	22.7592
								Sulfuric acid	Sulfur trioxide	oxygen from air	Air (untreated)
								5.59422	4.5415	2.82063	2.82064
										Sulfur	oil (in ground)
										1.95842	2.01718
										Water for rxn	Water (untreated)
										0.171002	0.171002
									Water for rxn	Water (untreated)
									1.13588	1.13588
								Water for rxn	Water (untreated)
								1.76617	1.76617
					Urea	Ammonia	Natural gas	blue water
					4.71444	2.66931	0.550043	0.177986
								Natural gas (unprocessed)
								0.561044
							nitrogen from air	Air (untreated)
							1.02662	1.02662
							oxygen from air	Air (untreated)
							0.455731	0.455732
							Water for rxn	Water (untreated)
							0.711774	0.711774
						Carbon dioxide	Natural gas	blue water
						3.44908	0.710723	0.229979
								Natural gas (unprocessed)
								0.724938
							nitrogen from air	Air (untreated)
							1.32652	1.32652
							oxygen from air	Air (untreated)
							0.588861	0.588862
							Water for rxn	Water (untreated)
							0.919699	0.919699
				calcium monoxide	Calcium carbonate	Limestone (in ground)
				18.8444	37.6889	40.525
				hydrogen peroxide	Benzene	pyrolysis gas	Naphtha	blue water
				18.2366	1.39423	0.404759	0.412683	1.15716
								oil (in ground)
								0.418048
						reformate, from naphtha	Naphtha	blue water
						0.9935	1.0085	2.82782
								oil (in ground)
								1.02161
					Hydrogen	hydrogen from SMR natural gas	Methane	Natural gas	blue water
					1.14327	1.14327	2.39372	2.42221	0.783792
									Natural gas (unprocessed)
									2.47066
							oxygen from air	Air (untreated)
							0.42423	0.42423
							Water for rxn	Water (untreated)
							5.21515	5.21515
					oxygen from air	Air (untreated)
					27.8846	27.8847
				Methane	Natural gas	blue water
				3.03943	3.0756	0.995219
						Natural gas (unprocessed)
						3.13711
				oxygen from air	Air (untreated)
				2724.45	2724.45
				Sodium chlorate	sodium chloride in brine 26 wtpct	salt rock, in ground
				34.6494	77.7913	77.7913
				Sodium hydroxide	sodium chloride in brine 26 wtpct	salt rock, in ground
				116.106	93.9813	93.9813
					Water for rxn	Water (untreated)
					27.4327	27.4327
				Sodium sulfate	Sulfuric acid	Sulfur trioxide	oxygen from air	Air (untreated)
				12.7656	3.65415	2.96651	1.84244	1.84244
							Sulfur	oil (in ground)
							1.27925	1.31762
							Water for rxn	Water (untreated)
							0.111699	0.111699
						Water for rxn	Water (untreated)
						0.74196	0.74196
					tincal (borax)	B2O3 in tincal ore	borax ore (in ground)
					14.3613	5.78493	22.2497
				Sulfuric acid	Sulfur trioxide	oxygen from air	Air (untreated)
				31.61	25.6616	15.9379	15.938
						Sulfur	oil (in ground)
						11.066	11.398
						Water for rxn	Water (untreated)
						0.966244	0.966244
					Water for rxn	Water (untreated)
					6.41829	6.41829
		methyl chloride	Hydrogen chloride	Chlorine	sodium chloride in brine 26 wtpct	salt rock, in ground
		371.7	280.544	202.274	163.73	163.73
					Water for rxn	Water (untreated)
					47.7919	47.7919
				Ethylene	Naphtha	blue water
				79.7702	81.332	228.055
						oil (in ground)
						82.3893
			methanol	Natural gas	blue water
			245.208	126.14	40.8171
					Natural gas (unprocessed)
					128.663
				oxygen from air	Air (untreated)
				126.013	126.013
				Water for rxn	Water (untreated)
				225.036	225.036
		Propylene oxide	ethylene glycol	Ethylene oxide	Ethylene	Naphtha	blue water
		53.661	13.4152	9.7067	7.2868	7.42947	20.8322
							oil (in ground)
							7.52605
					Oxygen	Air (untreated)
					7.12529	7.13136
				Water for rxn	Water (untreated)
				3.76617	3.76617
			Hypochlorous acid	Chlorine	sodium chloride in brine 26 wtpct	salt rock, in ground
			61.1096	45.0688	36.4806	36.4806
					Water for rxn	Water (untreated)
					10.6485	10.6485
				Sodium hydroxide	sodium chloride in brine 26 wtpct	salt rock, in ground
				24.0495	19.4667	19.4667
					Water for rxn	Water (untreated)
					5.68224	5.68224
			Propylene	Naphtha	blue water
			50.3367	51.3222	143.907
					oil (in ground)
					51.9894
			Sodium hydroxide	sodium chloride in brine 26 wtpct	salt rock, in ground
			40.8896	33.0979	33.0979
				Water for rxn	Water (untreated)
				9.66111	9.66111
		Sodium hydroxide	sodium chloride in brine 26 wtpct	salt rock, in ground
		500.267	404.938	404.938
			Water for rxn	Water (untreated)
			118.199	118.199
	sodium acetate	acetic acid	Carbon monoxide	Carbon dioxide	Natural gas	blue water
	879.965	654.382	344.205	171.981	35.4387	11.4674
						Natural gas (unprocessed)
						36.1475
					nitrogen from air	Air (untreated)
					66.1441	66.1442
					oxygen from air	Air (untreated)
					29.3623	29.3623
					Water for rxn	Water (untreated)
					45.8589	45.8589
				Natural gas	blue water
				116.018	37.5416
					Natural gas (unprocessed)
					118.338
				Water for rxn	Water (untreated)
				70.2213	70.2213
			methanol	Natural gas	blue water
			359.256	184.809	59.8015
					Natural gas (unprocessed)
					188.505
				oxygen from air	Air (untreated)
				184.622	184.623
				Water for rxn	Water (untreated)
				329.703	329.703
		Sodium hydroxide	sodium chloride in brine 26 wtpct	salt rock, in ground
		431.559	349.322	349.322
			Water for rxn	Water (untreated)
			101.966	101.966
		Water for rxn	Water (untreated)
		232.932	232.932
	Water for rxn	Water (untreated)
	18.3712	18.3712

## Sheet: HPMCAS CC
Material:	HPMCAS
Date:	6Jun2024
GWP 100, kg CO2							Acidification, kg SO2							Eutrophication, kg N							OzoneDepletion, kg CFC-11							Smog, kg O3
Chemicals	Total impact	Energy impact	Process impact	Cumulative impact	Process / Total this chemical	Process / Total this category	Chemicals	Total impact	Energy impact	Process impact	Cumulative impact	Process / Total this chemical	Process / Total this category	Chemicals	Total impact	Energy impact	Process impact	Cumulative impact	Process / Total this chemical	Process / Total this category	Chemicals	Total impact	Energy impact	Process impact	Cumulative impact	Process / Total this chemical	Process / Total this category	Chemicals	Total impact	Energy impact	Process impact	Cumulative impact	Process / Total this chemical	Process / Total this category
Total	10407.5	10341.3	66.1759			0.101946	Total	66.4859	54.2431	12.2427			0.18414	Total	2.08249	1.08154	1.00096			0.480654	Total	0.100712	3.07426e-05	0.100681			0.999695	Total	937.092	578.803	358.289			0.382341
Carbon dioxide, air	10216	9614.49	-506.278	0.887169	0.0588769	0.0522338	sulfur dioxide, air	38.3019	37.9493	0.352573	0.576091	0.00920511	0.00530298	NOx, air	1.03315	0.984968	0.0481827	0.496112	0.0466367	0.023137	methyl chloride, air	0.100684	3.02919e-06	0.100681	0.999725	0.99997	0.999695	NOx, air	578.359	551.386	26.9727	0.617185	0.0466367	0.0287835
Methane, air	1225.58	723.121	502.462	0.9936	0.409978	0.0436345	NOx, air	16.3289	15.5673	0.761524	0.82169	0.0466367	0.0114539	ammonium as N, liquid	0.454487	0	0.454487	0.714354	1	0.218242	methyl bromide, air	2.24788e-05	2.24788e-05	0	0.999948	0	0	Chlorine, air	202.947	0	202.947	0.833755	1	0.216571
methyl chloride, air	65.4447	0.00196897	65.4428	0.999283	0.99997	0.00568314	Ammonia, air	6.23519	0.105612	6.12958	0.915472	0.983062	0.0921938	Ammonia, air	0.393348	0.00666256	0.386685	0.903237	0.983062	0.185684	Methyl chloroform, air	1.56025e-06	1.56025e-06	0	0.999964	0	0	acetic acid, air	45.3094	0	45.3094	0.882106	1	0.048351
Nitrous oxide, air	7.57617	3.63956	3.93661	0.999941	0.519604	0.00034186	SOx, air	1.96643	0.0363434	1.93008	0.945049	0.981518	0.02903	Nitric oxide, air	0.0732102	0.0347898	0.0384203	0.938392	0.524795	0.0184492	chlorodifluoromethane, air	1.52803e-06	1.52803e-06	0	0.999979	0	0	Nitric oxide, air	26.4675	12.5775	13.89	0.910351	0.524795	0.0148225
dimethyl ether, air	0.611915	0	0.611915	0.999994	1	5.31395e-05	Hydrogen chloride, air	1.68349	0	1.68349	0.97037	1	0.0253211	Nitrogen dioxide, air	0.0408239	0.00263991	0.038184	0.957996	0.935334	0.0183357	carbon tetrachloride, air	1.20607e-06	1.20607e-06	0	0.999991	0	0	Nitrogen dioxide, air	15.527	1.00407	14.523	0.92692	0.935334	0.0154979
chlorodifluoromethane, air	0.0553147	0.0553147	0	0.999999	0	0	Nitric oxide, air	1.14224	0.542799	0.599442	0.98755	0.524795	0.00901609	Phosphate-P, liquid	0.0270271	0	0.0270271	0.970974	1	0.0129783	CFC-113, air	5.54307e-07	5.54307e-07	0	0.999996	0	0	NMVOC, air	12.1674	9.90407	2.26333	0.939904	0.186016	0.00241528
CFC-113, air	0.0033979	0.0033979	0	0.999999	0	0	Nitrogen dioxide, air	0.645219	0.0417236	0.603495	0.997255	0.935334	0.00907705	Phosphorus emission, liquid	0.0209703	0.0209703	0	0.981044	0	0	CFC-114, air	1.95143e-07	1.95143e-07	0	0.999998	0	0	Naphtha, air	10.7097	0	10.7097	0.951333	1	0.0114287
carbon tetrachloride, air	0.00231301	0.00231301	0	1	0	0	Sulfur trioxide, air	0.18252	0	0.18252	1	1	0.00274524	nitrogen, atomic, liquid	0.0173449	0.0173449	0	0.989373	0	0	CFC-11, air	1.90758e-07	1.90758e-07	0	1	0	0	Propylene, air	8.50376	0	8.50376	0.960408	1	0.00907463
CFC-114, air	0.00195143	0.00195143	0	1	0	0	Hydrogen fluoride, air	1.18656e-06	0	1.18656e-06	1	1	1.78467e-08	nitrogen, atomic, air	0.0114713	0.0114713	0	0.994881	0	0	Air (untreated), raw material	0	0	0	1	0	0	methanol, air	6.49191	0	6.49191	0.967335	1	0.00692772
Methyl chloroform, air	0.0018983	0.0018983	0	1	0	0	Air (untreated), raw material	0	0	0	1	0	0	BOD5, liquid	0.00751749	0	0.00751749	0.998491	1	0.00360985	bauxite ore (in ground), raw material	0	0	0	1	0	0	Ethylene, air	5.26754	0	5.26754	0.972956	1	0.00562116
CFC-11, air	0.000906103	0.000906103	0	1	0	0	bauxite ore (in ground), raw material	0	0	0	1	0	0	Ammonia, liquid	0.0026865	0.0026865	0	0.999781	0	0	blue water, raw material	0	0	0	1	0	0	ethanol, air	3.29635	0	3.29635	0.976474	1	0.00351763
methyl bromide, air	0.00022038	0.00022038	0	1	0	0	blue water, raw material	0	0	0	1	0	0	COD, liquid	0.000446756	0	0.000446756	0.999995	1	0.000214529	borax ore (in ground), raw material	0	0	0	1	0	0	pyrolysis gas, air	3.28982	0	3.28982	0.979985	1	0.00351067
Air (untreated), raw material	0	0	0	1	0	0	borax ore (in ground), raw material	0	0	0	1	0	0	BOD, liquid	9.61019e-06	2.55155e-06	7.05864e-06	1	0.734495	3.38951e-06	coal (in ground), raw material	0	0	0	1	0	0	Benzene, air	2.88173	1.87041	1.01132	0.98306	0.350941	0.00107921
bauxite ore (in ground), raw material	0	0	0	1	0	0	coal (in ground), raw material	0	0	0	1	0	0	Air (untreated), raw material	0	0	0	1	0	0	Limestone (in ground), raw material	0	0	0	1	0	0	Vinyl Chloride, air	2.50464	0	2.50464	0.985733	1	0.00267278
blue water, raw material	0	0	0	1	0	0	Limestone (in ground), raw material	0	0	0	1	0	0	bauxite ore (in ground), raw material	0	0	0	1	0	0	Natural gas (unprocessed), raw material	0	0	0	1	0	0	Ethylene carbonate, air	2.32898	0	2.32898	0.988218	1	0.00248532
borax ore (in ground), raw material	0	0	0	1	0	0	Natural gas (unprocessed), raw material	0	0	0	1	0	0	blue water, raw material	0	0	0	1	0	0	oil (in ground), raw material	0	0	0	1	0	0	Propylene oxide, air	1.97771	0	1.97771	0.990328	1	0.00211048
coal (in ground), raw material	0	0	0	1	0	0	oil (in ground), raw material	0	0	0	1	0	0	borax ore (in ground), raw material	0	0	0	1	0	0	phosphate ore, in ground, raw material	0	0	0	1	0	0	Carbon monoxide, air	1.52982	0.852819	0.676997	0.991961	0.442535	0.000722445
Limestone (in ground), raw material	0	0	0	1	0	0	phosphate ore, in ground, raw material	0	0	0	1	0	0	coal (in ground), raw material	0	0	0	1	0	0	salt rock, in ground, raw material	0	0	0	1	0	0	Butane, air	1.47159	0	1.47159	0.993531	1	0.00157038
Natural gas (unprocessed), raw material	0	0	0	1	0	0	salt rock, in ground, raw material	0	0	0	1	0	0	Limestone (in ground), raw material	0	0	0	1	0	0	sand (in ground), raw material	0	0	0	1	0	0	dichloroethane,-1,2, air	0.941866	0	0.941866	0.994536	1	0.00100509
oil (in ground), raw material	0	0	0	1	0	0	sand (in ground), raw material	0	0	0	1	0	0	Natural gas (unprocessed), raw material	0	0	0	1	0	0	sylvinite ore (in ground), raw material	0	0	0	1	0	0	isoprene, air	0.744516	0.744516	0	0.995331	0	0
phosphate ore, in ground, raw material	0	0	0	1	0	0	sylvinite ore (in ground), raw material	0	0	0	1	0	0	oil (in ground), raw material	0	0	0	1	0	0	Uranium, raw material	0	0	0	1	0	0	Methane, air	0.704931	0.415924	0.289006	0.996083	0.409978	0.000308407
salt rock, in ground, raw material	0	0	0	1	0	0	Uranium, raw material	0	0	0	1	0	0	phosphate ore, in ground, raw material	0	0	0	1	0	0	Water (untreated), raw material	0	0	0	1	0	0	dimethyl ether, air	0.493676	0	0.493676	0.99661	1	0.000526817
sand (in ground), raw material	0	0	0	1	0	0	Water (untreated), raw material	0	0	0	1	0	0	salt rock, in ground, raw material	0	0	0	1	0	0	0	0	0	0	1	0	0	Ethane, air	0.480695	0	0.480695	0.997123	1	0.000512965
sylvinite ore (in ground), raw material	0	0	0	1	0	0	0	0	0	0	1	0	0	sand (in ground), raw material	0	0	0	1	0	0	0	0	0	0	1	0	0	Butene, air	0.459611	0	0.459611	0.997613	1	0.000490465
Uranium, raw material	0	0	0	1	0	0	0	0	0	0	1	0	0	sylvinite ore (in ground), raw material	0	0	0	1	0	0	0	0	0	0	1	0	0	methyl acetate, air	0.418344	0	0.418344	0.99806	1	0.000446428
Water (untreated), raw material	0	0	0	1	0	0	0	0	0	0	1	0	0	Uranium, raw material	0	0	0	1	0	0	0	0	0	0	1	0	0	Hypochlorous acid, air	0.407685	0	0.407685	0.998495	1	0.000435053
0	0	0	0	1	0	0	0	0	0	0	1	0	0	Water (untreated), raw material	0	0	0	1	0	0	0	0	0	0	1	0	0	ethyl acetate, air	0.36867	0	0.36867	0.998888	1	0.000393419
0	0	0	0	1	0	0	0	0	0	0	1	0	0	0	0	0	0	1	0	0	0	0	0	0	1	0	0	1,3-butadiene, air	0.344059	0	0.344059	0.999256	1	0.000367156
0	0	0	0	1	0	0	0	0	0	0	1	0	0	0	0	0	0	1	0	0	0	0	0	0	1	0	0	Propane, air	0.278418	0	0.278418	0.999553	1	0.000297109
0	0	0	0	1	0	0	0	0	0	0	1	0	0	0	0	0	0	1	0	0	0	0	0	0	1	0	0	methyl chloride, air	0.192915	5.80404e-06	0.192909	0.999758	0.99997	0.000205859
0	0	0	0	1	0	0	0	0	0	0	1	0	0	0	0	0	0	1	0	0	0	0	0	0	1	0	0	formaldehyde, air	0.105099	0.0477074	0.0573914	0.999871	0.546071	6.12442e-05
0	0	0	0	1	0	0	0	0	0	0	1	0	0	0	0	0	0	1	0	0	0	0	0	0	1	0	0	High alkanes, air	0.026014	0	0.026014	0.999898	1	2.77604e-05
0	0	0	0	1	0	0	0	0	0	0	1	0	0	0	0	0	0	1	0	0	0	0	0	0	1	0	0	Propyne, air	0.0225622	0	0.0225622	0.999922	1	2.40768e-05
0	0	0	0	1	0	0	0	0	0	0	1	0	0	0	0	0	0	1	0	0	0	0	0	0	1	0	0	toluene, air	0.011056	0	0.011056	0.999934	1	1.17982e-05
0	0	0	0	1	0	0	0	0	0	0	1	0	0	0	0	0	0	1	0	0	0	0	0	0	1	0	0	n-hexane, air	0.0109836	0	0.0109836	0.999946	1	1.1721e-05
0	0	0	0	1	0	0	0	0	0	0	1	0	0	0	0	0	0	1	0	0	0	0	0	0	1	0	0	Acetaldehyde, air	0.00862878	0	0.00862878	0.999955	1	9.20804e-06
0	0	0	0	1	0	0	0	0	0	0	1	0	0	0	0	0	0	1	0	0	0	0	0	0	1	0	0	Hexene, air	0.00825234	0	0.00825234	0.999964	1	8.80633e-06
0	0	0	0	1	0	0	0	0	0	0	1	0	0	0	0	0	0	1	0	0	0	0	0	0	1	0	0	Ethylene oxide, air	0.00659587	0	0.00659587	0.999971	1	7.03866e-06
0	0	0	0	1	0	0	0	0	0	0	1	0	0	0	0	0	0	1	0	0	0	0	0	0	1	0	0	Acetylene, air	0.00593666	0	0.00593666	0.999977	1	6.33519e-06
0	0	0	0	1	0	0	0	0	0	0	1	0	0	0	0	0	0	1	0	0	0	0	0	0	1	0	0	1-Pentene, air	0.00580137	0	0.00580137	0.999984	1	6.19082e-06
0	0	0	0	1	0	0	0	0	0	0	1	0	0	0	0	0	0	1	0	0	1,3-butadiene, air	0	0	0	1	0	0	cyclohexane, air	0.00471815	0	0.00471815	0.999989	1	5.03489e-06
0	0	0	0	1	0	0	1,3-butadiene, air	0	0	0	1	0	0	0	0	0	0	1	0	0	1-Pentene, air	0	0	0	1	0	0	n-Pentane, air	0.00382609	0	0.00382609	0.999993	1	4.08294e-06
0	0	0	0	1	0	0	1-Pentene, air	0	0	0	1	0	0	0	0	0	0	1	0	0	Acetaldehyde, air	0	0	0	1	0	0	heptane, air	0.00378102	0	0.00378102	0.999997	1	4.03484e-06
0	0	0	0	1	0	0	Acetaldehyde, air	0	0	0	1	0	0	0	0	0	0	1	0	0	acetic acid, air	0	0	0	1	0	0	Octane, air	0.00237264	0	0.00237264	0.999999	1	2.53192e-06
1,3-butadiene, air	0	0	0	1	0	0	acetic acid, air	0	0	0	1	0	0	0	0	0	0	1	0	0	acetic anhydride, air	0	0	0	1	0	0	n-butanol, air	0.000281865	0	0.000281865	1	1	3.00787e-07
1-Pentene, air	0	0	0	1	0	0	acetic anhydride, air	0	0	0	1	0	0	1,3-butadiene, air	0	0	0	1	0	0	Acetylene, air	0	0	0	1	0	0	n-Propanol, air	0.000244381	0	0.000244381	1	1	2.60787e-07
Acetaldehyde, air	0	0	0	1	0	0	Acetylene, air	0	0	0	1	0	0	1-Pentene, air	0	0	0	1	0	0	Ammonia, air	0	0	0	1	0	0	Isobutane, air	0.000149262	0	0.000149262	1	1	1.59282e-07
acetic acid, air	0	0	0	1	0	0	Ammonium Hydroxide, air	0	0	0	1	0	0	Acetaldehyde, air	0	0	0	1	0	0	Ammonium Hydroxide, air	0	0	0	1	0	0	formic acid, air	1.21577e-05	0	1.21577e-05	1	1	1.29738e-08
acetic anhydride, air	0	0	0	1	0	0	Argon, air	0	0	0	1	0	0	acetic acid, air	0	0	0	1	0	0	Argon, air	0	0	0	1	0	0	methyl bromide, air	8.24912e-07	8.24912e-07	0	1	0	0
Acetylene, air	0	0	0	1	0	0	Arsenic, air	0	0	0	1	0	0	acetic anhydride, air	0	0	0	1	0	0	Arsenic, air	0	0	0	1	0	0	Methyl chloroform, air	6.34468e-08	6.34468e-08	0	1	0	0
Ammonia, air	0	0	0	1	0	0	Benzene, air	0	0	0	1	0	0	Acetylene, air	0	0	0	1	0	0	Benzene, air	0	0	0	1	0	0	Air (untreated), raw material	0	0	0	1	0	0
Ammonium Hydroxide, air	0	0	0	1	0	0	beryllium, air	0	0	0	1	0	0	Ammonium Hydroxide, air	0	0	0	1	0	0	beryllium, air	0	0	0	1	0	0	bauxite ore (in ground), raw material	0	0	0	1	0	0
Argon, air	0	0	0	1	0	0	Boric acid, air	0	0	0	1	0	0	Argon, air	0	0	0	1	0	0	Boric acid, air	0	0	0	1	0	0	blue water, raw material	0	0	0	1	0	0
Arsenic, air	0	0	0	1	0	0	Butane, air	0	0	0	1	0	0	Arsenic, air	0	0	0	1	0	0	Butane, air	0	0	0	1	0	0	borax ore (in ground), raw material	0	0	0	1	0	0
Benzene, air	0	0	0	1	0	0	Butene, air	0	0	0	1	0	0	Benzene, air	0	0	0	1	0	0	Butene, air	0	0	0	1	0	0	coal (in ground), raw material	0	0	0	1	0	0
beryllium, air	0	0	0	1	0	0	cadmium, air	0	0	0	1	0	0	beryllium, air	0	0	0	1	0	0	cadmium, air	0	0	0	1	0	0	Limestone (in ground), raw material	0	0	0	1	0	0
Boric acid, air	0	0	0	1	0	0	Carbon dioxide, air	0	0	0	1	0	0	Boric acid, air	0	0	0	1	0	0	Carbon dioxide, air	0	0	0	1	0	0	Natural gas (unprocessed), raw material	0	0	0	1	0	0
Butane, air	0	0	0	1	0	0	Carbon dioxide, biogenic, air	0	0	0	1	0	0	Butane, air	0	0	0	1	0	0	Carbon dioxide, biogenic, air	0	0	0	1	0	0	oil (in ground), raw material	0	0	0	1	0	0
Butene, air	0	0	0	1	0	0	Carbon monoxide, air	0	0	0	1	0	0	Butene, air	0	0	0	1	0	0	Carbon monoxide, air	0	0	0	1	0	0	phosphate ore, in ground, raw material	0	0	0	1	0	0
cadmium, air	0	0	0	1	0	0	carbon tetrachloride, air	0	0	0	1	0	0	cadmium, air	0	0	0	1	0	0	carbon tetrafluoride, air	0	0	0	1	0	0	salt rock, in ground, raw material	0	0	0	1	0	0
Carbon dioxide, biogenic, air	0	0	0	1	0	0	carbon tetrafluoride, air	0	0	0	1	0	0	Carbon dioxide, air	0	0	0	1	0	0	Chlorine, air	0	0	0	1	0	0	sand (in ground), raw material	0	0	0	1	0	0
Carbon monoxide, air	0	0	0	1	0	0	CFC-11, air	0	0	0	1	0	0	Carbon dioxide, biogenic, air	0	0	0	1	0	0	chromium, air	0	0	0	1	0	0	sylvinite ore (in ground), raw material	0	0	0	1	0	0
carbon tetrafluoride, air	0	0	0	1	0	0	CFC-113, air	0	0	0	1	0	0	Carbon monoxide, air	0	0	0	1	0	0	chromium VI, air	0	0	0	1	0	0	Uranium, raw material	0	0	0	1	0	0
Chlorine, air	0	0	0	1	0	0	CFC-114, air	0	0	0	1	0	0	carbon tetrachloride, air	0	0	0	1	0	0	COD, air	0	0	0	1	0	0	Water (untreated), raw material	0	0	0	1	0	0
chromium, air	0	0	0	1	0	0	Chlorine, air	0	0	0	1	0	0	carbon tetrafluoride, air	0	0	0	1	0	0	cyclohexane, air	0	0	0	1	0	0	0	0	0	0	1	0	0
chromium VI, air	0	0	0	1	0	0	chlorodifluoromethane, air	0	0	0	1	0	0	CFC-11, air	0	0	0	1	0	0	Dichlorine monoxide, air	0	0	0	1	0	0	0	0	0	0	1	0	0
COD, air	0	0	0	1	0	0	chromium, air	0	0	0	1	0	0	CFC-113, air	0	0	0	1	0	0	dichloroethane,-1,2, air	0	0	0	1	0	0	0	0	0	0	1	0	0
cyclohexane, air	0	0	0	1	0	0	chromium VI, air	0	0	0	1	0	0	CFC-114, air	0	0	0	1	0	0	dimethyl ether, air	0	0	0	1	0	0	0	0	0	0	1	0	0
Dichlorine monoxide, air	0	0	0	1	0	0	COD, air	0	0	0	1	0	0	Chlorine, air	0	0	0	1	0	0	Ethane, air	0	0	0	1	0	0	0	0	0	0	1	0	0
dichloroethane,-1,2, air	0	0	0	1	0	0	cyclohexane, air	0	0	0	1	0	0	chlorodifluoromethane, air	0	0	0	1	0	0	ethanol, air	0	0	0	1	0	0	0	0	0	0	1	0	0
Ethane, air	0	0	0	1	0	0	Dichlorine monoxide, air	0	0	0	1	0	0	chromium, air	0	0	0	1	0	0	ethyl acetate, air	0	0	0	1	0	0	0	0	0	0	1	0	0
ethanol, air	0	0	0	1	0	0	dichloroethane,-1,2, air	0	0	0	1	0	0	chromium VI, air	0	0	0	1	0	0	Ethylene, air	0	0	0	1	0	0	0	0	0	0	1	0	0
ethyl acetate, air	0	0	0	1	0	0	dimethyl ether, air	0	0	0	1	0	0	COD, air	0	0	0	1	0	0	Ethylene carbonate, air	0	0	0	1	0	0	0	0	0	0	1	0	0
Ethylene, air	0	0	0	1	0	0	Ethane, air	0	0	0	1	0	0	cyclohexane, air	0	0	0	1	0	0	Ethylene oxide, air	0	0	0	1	0	0	0	0	0	0	1	0	0
Ethylene carbonate, air	0	0	0	1	0	0	ethanol, air	0	0	0	1	0	0	Dichlorine monoxide, air	0	0	0	1	0	0	formaldehyde, air	0	0	0	1	0	0	0	0	0	0	1	0	0
Ethylene oxide, air	0	0	0	1	0	0	ethyl acetate, air	0	0	0	1	0	0	dichloroethane,-1,2, air	0	0	0	1	0	0	formic acid, air	0	0	0	1	0	0	0	0	0	0	1	0	0
formaldehyde, air	0	0	0	1	0	0	Ethylene, air	0	0	0	1	0	0	dimethyl ether, air	0	0	0	1	0	0	gas from explosives, air	0	0	0	1	0	0	0	0	0	0	1	0	0
formic acid, air	0	0	0	1	0	0	Ethylene carbonate, air	0	0	0	1	0	0	Ethane, air	0	0	0	1	0	0	heptane, air	0	0	0	1	0	0	0	0	0	0	1	0	0
gas from explosives, air	0	0	0	1	0	0	Ethylene oxide, air	0	0	0	1	0	0	ethanol, air	0	0	0	1	0	0	Hexene, air	0	0	0	1	0	0	0	0	0	0	1	0	0
heptane, air	0	0	0	1	0	0	formaldehyde, air	0	0	0	1	0	0	ethyl acetate, air	0	0	0	1	0	0	HFC-152a, air	0	0	0	1	0	0	0	0	0	0	1	0	0
Hexene, air	0	0	0	1	0	0	formic acid, air	0	0	0	1	0	0	Ethylene, air	0	0	0	1	0	0	High alkanes, air	0	0	0	1	0	0	0	0	0	0	1	0	0
HFC-152a, air	0	0	0	1	0	0	gas from explosives, air	0	0	0	1	0	0	Ethylene carbonate, air	0	0	0	1	0	0	Hydrogen, air	0	0	0	1	0	0	0	0	0	0	1	0	0
High alkanes, air	0	0	0	1	0	0	heptane, air	0	0	0	1	0	0	Ethylene oxide, air	0	0	0	1	0	0	Hydrogen chloride, air	0	0	0	1	0	0	acetic anhydride, air	0	0	0	1	0	0
Hydrogen, air	0	0	0	1	0	0	Hexene, air	0	0	0	1	0	0	formaldehyde, air	0	0	0	1	0	0	Hydrogen fluoride, air	0	0	0	1	0	0	Ammonia, air	0	0	0	1	0	0
Hydrogen chloride, air	0	0	0	1	0	0	HFC-152a, air	0	0	0	1	0	0	formic acid, air	0	0	0	1	0	0	Hydrogen sulfide, air	0	0	0	1	0	0	Ammonium Hydroxide, air	0	0	0	1	0	0
Hydrogen fluoride, air	0	0	0	1	0	0	High alkanes, air	0	0	0	1	0	0	gas from explosives, air	0	0	0	1	0	0	Hypochlorous acid, air	0	0	0	1	0	0	Argon, air	0	0	0	1	0	0
Hydrogen sulfide, air	0	0	0	1	0	0	Hydrogen, air	0	0	0	1	0	0	heptane, air	0	0	0	1	0	0	Isobutane, air	0	0	0	1	0	0	Arsenic, air	0	0	0	1	0	0
Hypochlorous acid, air	0	0	0	1	0	0	Hydrogen sulfide, air	0	0	0	1	0	0	Hexene, air	0	0	0	1	0	0	isoprene, air	0	0	0	1	0	0	beryllium, air	0	0	0	1	0	0
Isobutane, air	0	0	0	1	0	0	Hypochlorous acid, air	0	0	0	1	0	0	HFC-152a, air	0	0	0	1	0	0	ketene, air	0	0	0	1	0	0	Boric acid, air	0	0	0	1	0	0
isoprene, air	0	0	0	1	0	0	Isobutane, air	0	0	0	1	0	0	High alkanes, air	0	0	0	1	0	0	lead, air	0	0	0	1	0	0	cadmium, air	0	0	0	1	0	0
ketene, air	0	0	0	1	0	0	isoprene, air	0	0	0	1	0	0	Hydrogen, air	0	0	0	1	0	0	Mercury, air	0	0	0	1	0	0	Carbon dioxide, air	0	0	0	1	0	0
lead, air	0	0	0	1	0	0	ketene, air	0	0	0	1	0	0	Hydrogen chloride, air	0	0	0	1	0	0	metals (unspecified), air	0	0	0	1	0	0	Carbon dioxide, biogenic, air	0	0	0	1	0	0
Mercury, air	0	0	0	1	0	0	lead, air	0	0	0	1	0	0	Hydrogen fluoride, air	0	0	0	1	0	0	Methane, air	0	0	0	1	0	0	carbon tetrachloride, air	0	0	0	1	0	0
metals (unspecified), air	0	0	0	1	0	0	Mercury, air	0	0	0	1	0	0	Hydrogen sulfide, air	0	0	0	1	0	0	methanol, air	0	0	0	1	0	0	carbon tetrafluoride, air	0	0	0	1	0	0
methanol, air	0	0	0	1	0	0	metals (unspecified), air	0	0	0	1	0	0	Hypochlorous acid, air	0	0	0	1	0	0	methyl acetate, air	0	0	0	1	0	0	CFC-11, air	0	0	0	1	0	0
methyl acetate, air	0	0	0	1	0	0	Methane, air	0	0	0	1	0	0	Isobutane, air	0	0	0	1	0	0	Naphtha, air	0	0	0	1	0	0	CFC-113, air	0	0	0	1	0	0
Naphtha, air	0	0	0	1	0	0	methanol, air	0	0	0	1	0	0	isoprene, air	0	0	0	1	0	0	n-butanol, air	0	0	0	1	0	0	CFC-114, air	0	0	0	1	0	0
n-butanol, air	0	0	0	1	0	0	methyl acetate, air	0	0	0	1	0	0	ketene, air	0	0	0	1	0	0	n-hexane, air	0	0	0	1	0	0	chlorodifluoromethane, air	0	0	0	1	0	0
n-hexane, air	0	0	0	1	0	0	methyl bromide, air	0	0	0	1	0	0	lead, air	0	0	0	1	0	0	nickel, air	0	0	0	1	0	0	chromium, air	0	0	0	1	0	0
nickel, air	0	0	0	1	0	0	methyl chloride, air	0	0	0	1	0	0	Mercury, air	0	0	0	1	0	0	Nitric oxide, air	0	0	0	1	0	0	chromium VI, air	0	0	0	1	0	0
Nitric oxide, air	0	0	0	1	0	0	Methyl chloroform, air	0	0	0	1	0	0	metals (unspecified), air	0	0	0	1	0	0	Nitrogen dioxide, air	0	0	0	1	0	0	COD, air	0	0	0	1	0	0
Nitrogen dioxide, air	0	0	0	1	0	0	Naphtha, air	0	0	0	1	0	0	Methane, air	0	0	0	1	0	0	nitrogen, atomic, air	0	0	0	1	0	0	Dichlorine monoxide, air	0	0	0	1	0	0
nitrogen, atomic, air	0	0	0	1	0	0	n-butanol, air	0	0	0	1	0	0	methanol, air	0	0	0	1	0	0	Nitrous oxide, air	0	0	0	1	0	0	gas from explosives, air	0	0	0	1	0	0
NMVOC, air	0	0	0	1	0	0	n-hexane, air	0	0	0	1	0	0	methyl acetate, air	0	0	0	1	0	0	NMVOC, air	0	0	0	1	0	0	HFC-152a, air	0	0	0	1	0	0
NOx, air	0	0	0	1	0	0	nickel, air	0	0	0	1	0	0	methyl bromide, air	0	0	0	1	0	0	NOx, air	0	0	0	1	0	0	Hydrogen, air	0	0	0	1	0	0
n-Pentane, air	0	0	0	1	0	0	nitrogen, atomic, air	0	0	0	1	0	0	methyl chloride, air	0	0	0	1	0	0	n-Pentane, air	0	0	0	1	0	0	Hydrogen chloride, air	0	0	0	1	0	0
n-Propanol, air	0	0	0	1	0	0	Nitrous oxide, air	0	0	0	1	0	0	Methyl chloroform, air	0	0	0	1	0	0	n-Propanol, air	0	0	0	1	0	0	Hydrogen fluoride, air	0	0	0	1	0	0
Octane, air	0	0	0	1	0	0	NMVOC, air	0	0	0	1	0	0	Naphtha, air	0	0	0	1	0	0	Octane, air	0	0	0	1	0	0	Hydrogen sulfide, air	0	0	0	1	0	0
organic matter (unspecified), air	0	0	0	1	0	0	n-Pentane, air	0	0	0	1	0	0	n-butanol, air	0	0	0	1	0	0	organic matter (unspecified), air	0	0	0	1	0	0	ketene, air	0	0	0	1	0	0
Particulate matter, air	0	0	0	1	0	0	n-Propanol, air	0	0	0	1	0	0	n-hexane, air	0	0	0	1	0	0	Particulate matter, air	0	0	0	1	0	0	lead, air	0	0	0	1	0	0
particulate matter 2.5, air	0	0	0	1	0	0	Octane, air	0	0	0	1	0	0	nickel, air	0	0	0	1	0	0	particulate matter 2.5, air	0	0	0	1	0	0	Mercury, air	0	0	0	1	0	0
perfluoroethane, air	0	0	0	1	0	0	organic matter (unspecified), air	0	0	0	1	0	0	Nitrous oxide, air	0	0	0	1	0	0	perfluoroethane, air	0	0	0	1	0	0	metals (unspecified), air	0	0	0	1	0	0
PM10, air	0	0	0	1	0	0	Particulate matter, air	0	0	0	1	0	0	NMVOC, air	0	0	0	1	0	0	PM10, air	0	0	0	1	0	0	nickel, air	0	0	0	1	0	0
Propane, air	0	0	0	1	0	0	particulate matter 2.5, air	0	0	0	1	0	0	n-Pentane, air	0	0	0	1	0	0	Propane, air	0	0	0	1	0	0	nitrogen, atomic, air	0	0	0	1	0	0
propargyl alcohol, air	0	0	0	1	0	0	perfluoroethane, air	0	0	0	1	0	0	n-Propanol, air	0	0	0	1	0	0	propargyl alcohol, air	0	0	0	1	0	0	Nitrous oxide, air	0	0	0	1	0	0
Propylene, air	0	0	0	1	0	0	PM10, air	0	0	0	1	0	0	Octane, air	0	0	0	1	0	0	Propylene, air	0	0	0	1	0	0	organic matter (unspecified), air	0	0	0	1	0	0
Propylene oxide, air	0	0	0	1	0	0	Propane, air	0	0	0	1	0	0	organic matter (unspecified), air	0	0	0	1	0	0	Propylene oxide, air	0	0	0	1	0	0	Particulate matter, air	0	0	0	1	0	0
Propyne, air	0	0	0	1	0	0	propargyl alcohol, air	0	0	0	1	0	0	Particulate matter, air	0	0	0	1	0	0	Propyne, air	0	0	0	1	0	0	particulate matter 2.5, air	0	0	0	1	0	0
pyrolysis gas, air	0	0	0	1	0	0	Propylene, air	0	0	0	1	0	0	particulate matter 2.5, air	0	0	0	1	0	0	pyrolysis gas, air	0	0	0	1	0	0	perfluoroethane, air	0	0	0	1	0	0
silver, air	0	0	0	1	0	0	Propylene oxide, air	0	0	0	1	0	0	perfluoroethane, air	0	0	0	1	0	0	silver, air	0	0	0	1	0	0	PM10, air	0	0	0	1	0	0
Sodium chlorate, air	0	0	0	1	0	0	Propyne, air	0	0	0	1	0	0	PM10, air	0	0	0	1	0	0	Sodium chlorate, air	0	0	0	1	0	0	propargyl alcohol, air	0	0	0	1	0	0
Sodium sulfate, air	0	0	0	1	0	0	pyrolysis gas, air	0	0	0	1	0	0	Propane, air	0	0	0	1	0	0	Sodium sulfate, air	0	0	0	1	0	0	silver, air	0	0	0	1	0	0
SOx, air	0	0	0	1	0	0	silver, air	0	0	0	1	0	0	propargyl alcohol, air	0	0	0	1	0	0	SOx, air	0	0	0	1	0	0	Sodium chlorate, air	0	0	0	1	0	0
Sulfur, air	0	0	0	1	0	0	Sodium chlorate, air	0	0	0	1	0	0	Propylene, air	0	0	0	1	0	0	Sulfur, air	0	0	0	1	0	0	Sodium sulfate, air	0	0	0	1	0	0
sulfur dioxide, air	0	0	0	1	0	0	Sodium sulfate, air	0	0	0	1	0	0	Propylene oxide, air	0	0	0	1	0	0	sulfur dioxide, air	0	0	0	1	0	0	SOx, air	0	0	0	1	0	0
Sulfur hexafluoride, air	0	0	0	1	0	0	Sulfur, air	0	0	0	1	0	0	Propyne, air	0	0	0	1	0	0	Sulfur hexafluoride, air	0	0	0	1	0	0	Sulfur, air	0	0	0	1	0	0
Sulfur trioxide, air	0	0	0	1	0	0	Sulfur hexafluoride, air	0	0	0	1	0	0	pyrolysis gas, air	0	0	0	1	0	0	Sulfur trioxide, air	0	0	0	1	0	0	sulfur dioxide, air	0	0	0	1	0	0
toluene, air	0	0	0	1	0	0	toluene, air	0	0	0	1	0	0	silver, air	0	0	0	1	0	0	toluene, air	0	0	0	1	0	0	Sulfur hexafluoride, air	0	0	0	1	0	0
Urea, air	0	0	0	1	0	0	Urea, air	0	0	0	1	0	0	Sodium chlorate, air	0	0	0	1	0	0	Urea, air	0	0	0	1	0	0	Sulfur trioxide, air	0	0	0	1	0	0
Vinyl Chloride, air	0	0	0	1	0	0	Vinyl Chloride, air	0	0	0	1	0	0	Sodium sulfate, air	0	0	0	1	0	0	Vinyl Chloride, air	0	0	0	1	0	0	Urea, air	0	0	0	1	0	0
VOCs (unspecified), air	0	0	0	1	0	0	VOCs (unspecified), air	0	0	0	1	0	0	SOx, air	0	0	0	1	0	0	VOCs (unspecified), air	0	0	0	1	0	0	VOCs (unspecified), air	0	0	0	1	0	0
Zinc, air	0	0	0	1	0	0	Zinc, air	0	0	0	1	0	0	Sulfur, air	0	0	0	1	0	0	Zinc, air	0	0	0	1	0	0	Zinc, air	0	0	0	1	0	0
1-Pentene, liquid	0	0	0	1	0	0	1-Pentene, liquid	0	0	0	1	0	0	sulfur dioxide, air	0	0	0	1	0	0	1-Pentene, liquid	0	0	0	1	0	0	1-Pentene, liquid	0	0	0	1	0	0
Acetaldehyde, liquid	0	0	0	1	0	0	Acetaldehyde, liquid	0	0	0	1	0	0	Sulfur hexafluoride, air	0	0	0	1	0	0	Acetaldehyde, liquid	0	0	0	1	0	0	Acetaldehyde, liquid	0	0	0	1	0	0
acetic acid, liquid	0	0	0	1	0	0	acetic acid, liquid	0	0	0	1	0	0	Sulfur trioxide, air	0	0	0	1	0	0	acetic acid, liquid	0	0	0	1	0	0	acetic acid, liquid	0	0	0	1	0	0
acetic anhydride, liquid	0	0	0	1	0	0	acetic anhydride, liquid	0	0	0	1	0	0	toluene, air	0	0	0	1	0	0	acetic anhydride, liquid	0	0	0	1	0	0	acetic anhydride, liquid	0	0	0	1	0	0
Ammonia, liquid	0	0	0	1	0	0	Ammonia, liquid	0	0	0	1	0	0	Urea, air	0	0	0	1	0	0	Ammonia, liquid	0	0	0	1	0	0	Ammonia, liquid	0	0	0	1	0	0
ammonium as N, liquid	0	0	0	1	0	0	ammonium as N, liquid	0	0	0	1	0	0	Vinyl Chloride, air	0	0	0	1	0	0	ammonium as N, liquid	0	0	0	1	0	0	ammonium as N, liquid	0	0	0	1	0	0
Arsenic, liquid	0	0	0	1	0	0	Arsenic, liquid	0	0	0	1	0	0	VOCs (unspecified), air	0	0	0	1	0	0	Arsenic, liquid	0	0	0	1	0	0	Arsenic, liquid	0	0	0	1	0	0
Atrazine, liquid	0	0	0	1	0	0	Atrazine, liquid	0	0	0	1	0	0	Zinc, air	0	0	0	1	0	0	Atrazine, liquid	0	0	0	1	0	0	Atrazine, liquid	0	0	0	1	0	0
barium, liquid	0	0	0	1	0	0	barium, liquid	0	0	0	1	0	0	1-Pentene, liquid	0	0	0	1	0	0	barium, liquid	0	0	0	1	0	0	barium, liquid	0	0	0	1	0	0
Benzene, liquid	0	0	0	1	0	0	Benzene, liquid	0	0	0	1	0	0	Acetaldehyde, liquid	0	0	0	1	0	0	Benzene, liquid	0	0	0	1	0	0	Benzene, liquid	0	0	0	1	0	0
BOD, liquid	0	0	0	1	0	0	BOD, liquid	0	0	0	1	0	0	acetic acid, liquid	0	0	0	1	0	0	BOD, liquid	0	0	0	1	0	0	BOD, liquid	0	0	0	1	0	0
BOD5, liquid	0	0	0	1	0	0	BOD5, liquid	0	0	0	1	0	0	acetic anhydride, liquid	0	0	0	1	0	0	BOD5, liquid	0	0	0	1	0	0	BOD5, liquid	0	0	0	1	0	0
Boron, liquid	0	0	0	1	0	0	Boron, liquid	0	0	0	1	0	0	Arsenic, liquid	0	0	0	1	0	0	Boron, liquid	0	0	0	1	0	0	Boron, liquid	0	0	0	1	0	0
Carbon dioxide, liquid	0	0	0	1	0	0	Carbon dioxide, liquid	0	0	0	1	0	0	Atrazine, liquid	0	0	0	1	0	0	Carbon dioxide, liquid	0	0	0	1	0	0	Carbon dioxide, liquid	0	0	0	1	0	0
Carbon monoxide, liquid	0	0	0	1	0	0	Carbon monoxide, liquid	0	0	0	1	0	0	barium, liquid	0	0	0	1	0	0	Carbon monoxide, liquid	0	0	0	1	0	0	Carbon monoxide, liquid	0	0	0	1	0	0
Chloride, liquid	0	0	0	1	0	0	Chloride, liquid	0	0	0	1	0	0	Benzene, liquid	0	0	0	1	0	0	Chloride, liquid	0	0	0	1	0	0	Chloride, liquid	0	0	0	1	0	0
Chlorine, liquid	0	0	0	1	0	0	Chlorine, liquid	0	0	0	1	0	0	Boron, liquid	0	0	0	1	0	0	Chlorine, liquid	0	0	0	1	0	0	Chlorine, liquid	0	0	0	1	0	0
Chlorine dioxide, liquid	0	0	0	1	0	0	Chlorine dioxide, liquid	0	0	0	1	0	0	Carbon dioxide, liquid	0	0	0	1	0	0	Chlorine dioxide, liquid	0	0	0	1	0	0	Chlorine dioxide, liquid	0	0	0	1	0	0
chromium, liquid	0	0	0	1	0	0	chromium, liquid	0	0	0	1	0	0	Carbon monoxide, liquid	0	0	0	1	0	0	chromium, liquid	0	0	0	1	0	0	chromium, liquid	0	0	0	1	0	0
Chromium III, liquid	0	0	0	1	0	0	Chromium III, liquid	0	0	0	1	0	0	Chloride, liquid	0	0	0	1	0	0	Chromium III, liquid	0	0	0	1	0	0	Chromium III, liquid	0	0	0	1	0	0
Chromium VI, liquid	0	0	0	1	0	0	Chromium VI, liquid	0	0	0	1	0	0	Chlorine, liquid	0	0	0	1	0	0	Chromium VI, liquid	0	0	0	1	0	0	Chromium VI, liquid	0	0	0	1	0	0
COD, liquid	0	0	0	1	0	0	COD, liquid	0	0	0	1	0	0	Chlorine dioxide, liquid	0	0	0	1	0	0	COD, liquid	0	0	0	1	0	0	COD, liquid	0	0	0	1	0	0
diammonium phosphate (DAP), liquid	0	0	0	1	0	0	diammonium phosphate (DAP), liquid	0	0	0	1	0	0	chromium, liquid	0	0	0	1	0	0	diammonium phosphate (DAP), liquid	0	0	0	1	0	0	diammonium phosphate (DAP), liquid	0	0	0	1	0	0
dimethyl ether, liquid	0	0	0	1	0	0	dimethyl ether, liquid	0	0	0	1	0	0	Chromium III, liquid	0	0	0	1	0	0	dimethyl ether, liquid	0	0	0	1	0	0	dimethyl ether, liquid	0	0	0	1	0	0
Dimethyl sulfate, liquid	0	0	0	1	0	0	Dimethyl sulfate, liquid	0	0	0	1	0	0	Chromium VI, liquid	0	0	0	1	0	0	Dimethyl sulfate, liquid	0	0	0	1	0	0	Dimethyl sulfate, liquid	0	0	0	1	0	0
ethanecarboxylic acid, liquid	0	0	0	1	0	0	ethanecarboxylic acid, liquid	0	0	0	1	0	0	diammonium phosphate (DAP), liquid	0	0	0	1	0	0	ethanecarboxylic acid, liquid	0	0	0	1	0	0	ethanecarboxylic acid, liquid	0	0	0	1	0	0
ethanol, liquid	0	0	0	1	0	0	ethanol, liquid	0	0	0	1	0	0	dimethyl ether, liquid	0	0	0	1	0	0	ethanol, liquid	0	0	0	1	0	0	ethanol, liquid	0	0	0	1	0	0
ethyl acetate, liquid	0	0	0	1	0	0	ethyl acetate, liquid	0	0	0	1	0	0	Dimethyl sulfate, liquid	0	0	0	1	0	0	ethyl acetate, liquid	0	0	0	1	0	0	ethyl acetate, liquid	0	0	0	1	0	0
ethyl butanol, liquid	0	0	0	1	0	0	ethyl butanol, liquid	0	0	0	1	0	0	ethanecarboxylic acid, liquid	0	0	0	1	0	0	ethyl butanol, liquid	0	0	0	1	0	0	ethyl butanol, liquid	0	0	0	1	0	0
ethylene glycol, liquid	0	0	0	1	0	0	ethylene glycol, liquid	0	0	0	1	0	0	ethanol, liquid	0	0	0	1	0	0	ethylene glycol, liquid	0	0	0	1	0	0	ethylene glycol, liquid	0	0	0	1	0	0
Ethylene Glycol, Tri, liquid	0	0	0	1	0	0	Ethylene Glycol, Tri, liquid	0	0	0	1	0	0	ethyl acetate, liquid	0	0	0	1	0	0	Ethylene Glycol, Tri, liquid	0	0	0	1	0	0	Ethylene Glycol, Tri, liquid	0	0	0	1	0	0
formaldehyde, liquid	0	0	0	1	0	0	formaldehyde, liquid	0	0	0	1	0	0	ethyl butanol, liquid	0	0	0	1	0	0	formaldehyde, liquid	0	0	0	1	0	0	formaldehyde, liquid	0	0	0	1	0	0
glycerol, liquid	0	0	0	1	0	0	glycerol, liquid	0	0	0	1	0	0	ethylene glycol, liquid	0	0	0	1	0	0	glycerol, liquid	0	0	0	1	0	0	glycerol, liquid	0	0	0	1	0	0
grease / oil, liquid	0	0	0	1	0	0	grease / oil, liquid	0	0	0	1	0	0	Ethylene Glycol, Tri, liquid	0	0	0	1	0	0	grease / oil, liquid	0	0	0	1	0	0	grease / oil, liquid	0	0	0	1	0	0
Hexene, liquid	0	0	0	1	0	0	Hexene, liquid	0	0	0	1	0	0	formaldehyde, liquid	0	0	0	1	0	0	Hexene, liquid	0	0	0	1	0	0	Hexene, liquid	0	0	0	1	0	0
Higher Glycols, liquid	0	0	0	1	0	0	Higher Glycols, liquid	0	0	0	1	0	0	glycerol, liquid	0	0	0	1	0	0	Higher Glycols, liquid	0	0	0	1	0	0	Higher Glycols, liquid	0	0	0	1	0	0
HPMC 1p3DS 0p2 MS, liquid	0	0	0	1	0	0	HPMC 1p3DS 0p2 MS, liquid	0	0	0	1	0	0	grease / oil, liquid	0	0	0	1	0	0	HPMC 1p3DS 0p2 MS, liquid	0	0	0	1	0	0	HPMC 1p3DS 0p2 MS, liquid	0	0	0	1	0	0
Hydrogen, liquid	0	0	0	1	0	0	Hydrogen, liquid	0	0	0	1	0	0	Hexene, liquid	0	0	0	1	0	0	Hydrogen, liquid	0	0	0	1	0	0	Hydrogen, liquid	0	0	0	1	0	0
Hydrogen chloride, liquid	0	0	0	1	0	0	Hydrogen chloride, liquid	0	0	0	1	0	0	Higher Glycols, liquid	0	0	0	1	0	0	Hydrogen chloride, liquid	0	0	0	1	0	0	Hydrogen chloride, liquid	0	0	0	1	0	0
hydrogen peroxide, liquid	0	0	0	1	0	0	hydrogen peroxide, liquid	0	0	0	1	0	0	HPMC 1p3DS 0p2 MS, liquid	0	0	0	1	0	0	hydrogen peroxide, liquid	0	0	0	1	0	0	hydrogen peroxide, liquid	0	0	0	1	0	0
Iron (Fe++, Fe3+), liquid	0	0	0	1	0	0	Iron (Fe++, Fe3+), liquid	0	0	0	1	0	0	Hydrogen, liquid	0	0	0	1	0	0	Iron (Fe++, Fe3+), liquid	0	0	0	1	0	0	Iron (Fe++, Fe3+), liquid	0	0	0	1	0	0
lead, liquid	0	0	0	1	0	0	lead, liquid	0	0	0	1	0	0	Hydrogen chloride, liquid	0	0	0	1	0	0	lead, liquid	0	0	0	1	0	0	lead, liquid	0	0	0	1	0	0
Maleic Acid, liquid	0	0	0	1	0	0	Maleic Acid, liquid	0	0	0	1	0	0	hydrogen peroxide, liquid	0	0	0	1	0	0	Maleic Acid, liquid	0	0	0	1	0	0	Maleic Acid, liquid	0	0	0	1	0	0
methanol, liquid	0	0	0	1	0	0	methanol, liquid	0	0	0	1	0	0	Iron (Fe++, Fe3+), liquid	0	0	0	1	0	0	methanol, liquid	0	0	0	1	0	0	methanol, liquid	0	0	0	1	0	0
methyl acetate, liquid	0	0	0	1	0	0	methyl acetate, liquid	0	0	0	1	0	0	lead, liquid	0	0	0	1	0	0	methyl acetate, liquid	0	0	0	1	0	0	methyl acetate, liquid	0	0	0	1	0	0
methyl chloride, liquid	0	0	0	1	0	0	methyl chloride, liquid	0	0	0	1	0	0	Maleic Acid, liquid	0	0	0	1	0	0	methyl chloride, liquid	0	0	0	1	0	0	methyl chloride, liquid	0	0	0	1	0	0
Methyl iodide, liquid	0	0	0	1	0	0	Methyl iodide, liquid	0	0	0	1	0	0	methanol, liquid	0	0	0	1	0	0	Methyl iodide, liquid	0	0	0	1	0	0	Methyl iodide, liquid	0	0	0	1	0	0
Mobile ions, liquid	0	0	0	1	0	0	Mobile ions, liquid	0	0	0	1	0	0	methyl acetate, liquid	0	0	0	1	0	0	Mobile ions, liquid	0	0	0	1	0	0	Mobile ions, liquid	0	0	0	1	0	0
n-butanol, liquid	0	0	0	1	0	0	n-butanol, liquid	0	0	0	1	0	0	methyl chloride, liquid	0	0	0	1	0	0	n-butanol, liquid	0	0	0	1	0	0	n-butanol, liquid	0	0	0	1	0	0
n-hexane, liquid	0	0	0	1	0	0	n-hexane, liquid	0	0	0	1	0	0	Methyl iodide, liquid	0	0	0	1	0	0	n-hexane, liquid	0	0	0	1	0	0	n-hexane, liquid	0	0	0	1	0	0
nickel, liquid	0	0	0	1	0	0	nickel, liquid	0	0	0	1	0	0	Mobile ions, liquid	0	0	0	1	0	0	nickel, liquid	0	0	0	1	0	0	nickel, liquid	0	0	0	1	0	0
Nitrate-N, liquid	0	0	0	1	0	0	Nitrate-N, liquid	0	0	0	1	0	0	n-butanol, liquid	0	0	0	1	0	0	Nitrate-N, liquid	0	0	0	1	0	0	Nitrate-N, liquid	0	0	0	1	0	0
nitrogen, atomic, liquid	0	0	0	1	0	0	nitrogen, atomic, liquid	0	0	0	1	0	0	n-hexane, liquid	0	0	0	1	0	0	nitrogen, atomic, liquid	0	0	0	1	0	0	nitrogen, atomic, liquid	0	0	0	1	0	0
n-Pentane, liquid	0	0	0	1	0	0	n-Pentane, liquid	0	0	0	1	0	0	nickel, liquid	0	0	0	1	0	0	n-Pentane, liquid	0	0	0	1	0	0	n-Pentane, liquid	0	0	0	1	0	0
n-Propanol, liquid	0	0	0	1	0	0	n-Propanol, liquid	0	0	0	1	0	0	Nitrate-N, liquid	0	0	0	1	0	0	n-Propanol, liquid	0	0	0	1	0	0	n-Propanol, liquid	0	0	0	1	0	0
Phosphate-P, liquid	0	0	0	1	0	0	Phosphate-P, liquid	0	0	0	1	0	0	n-Pentane, liquid	0	0	0	1	0	0	Phosphate-P, liquid	0	0	0	1	0	0	Phosphate-P, liquid	0	0	0	1	0	0
Phosphorus emission, liquid	0	0	0	1	0	0	Phosphorus emission, liquid	0	0	0	1	0	0	n-Propanol, liquid	0	0	0	1	0	0	Phosphorus emission, liquid	0	0	0	1	0	0	Phosphorus emission, liquid	0	0	0	1	0	0
Potassium chloride, liquid	0	0	0	1	0	0	Potassium chloride, liquid	0	0	0	1	0	0	Potassium chloride, liquid	0	0	0	1	0	0	Potassium chloride, liquid	0	0	0	1	0	0	Potassium chloride, liquid	0	0	0	1	0	0
Propane, liquid	0	0	0	1	0	0	Propane, liquid	0	0	0	1	0	0	Propane, liquid	0	0	0	1	0	0	Propane, liquid	0	0	0	1	0	0	Propane, liquid	0	0	0	1	0	0
propargyl alcohol, liquid	0	0	0	1	0	0	propargyl alcohol, liquid	0	0	0	1	0	0	propargyl alcohol, liquid	0	0	0	1	0	0	propargyl alcohol, liquid	0	0	0	1	0	0	propargyl alcohol, liquid	0	0	0	1	0	0
Propylene, liquid	0	0	0	1	0	0	Propylene, liquid	0	0	0	1	0	0	Propylene, liquid	0	0	0	1	0	0	Propylene, liquid	0	0	0	1	0	0	Propylene, liquid	0	0	0	1	0	0
Propylene Chlorohydrin, liquid	0	0	0	1	0	0	Propylene Chlorohydrin, liquid	0	0	0	1	0	0	Propylene Chlorohydrin, liquid	0	0	0	1	0	0	Propylene Chlorohydrin, liquid	0	0	0	1	0	0	Propylene Chlorohydrin, liquid	0	0	0	1	0	0
Propylene oxide, liquid	0	0	0	1	0	0	Propylene oxide, liquid	0	0	0	1	0	0	Propylene oxide, liquid	0	0	0	1	0	0	Propylene oxide, liquid	0	0	0	1	0	0	Propylene oxide, liquid	0	0	0	1	0	0
pyrolysis gas, liquid	0	0	0	1	0	0	pyrolysis gas, liquid	0	0	0	1	0	0	pyrolysis gas, liquid	0	0	0	1	0	0	pyrolysis gas, liquid	0	0	0	1	0	0	pyrolysis gas, liquid	0	0	0	1	0	0
Rh-Complex, liquid	0	0	0	1	0	0	Rh-Complex, liquid	0	0	0	1	0	0	Rh-Complex, liquid	0	0	0	1	0	0	Rh-Complex, liquid	0	0	0	1	0	0	Rh-Complex, liquid	0	0	0	1	0	0
silver, liquid	0	0	0	1	0	0	silver, liquid	0	0	0	1	0	0	silver, liquid	0	0	0	1	0	0	silver, liquid	0	0	0	1	0	0	silver, liquid	0	0	0	1	0	0
Sodium acetate trihydrate, liquid	0	0	0	1	0	0	Sodium acetate trihydrate, liquid	0	0	0	1	0	0	Sodium acetate trihydrate, liquid	0	0	0	1	0	0	Sodium acetate trihydrate, liquid	0	0	0	1	0	0	Sodium acetate trihydrate, liquid	0	0	0	1	0	0
Sodium chlorate, liquid	0	0	0	1	0	0	Sodium chlorate, liquid	0	0	0	1	0	0	Sodium chlorate, liquid	0	0	0	1	0	0	Sodium chlorate, liquid	0	0	0	1	0	0	Sodium chlorate, liquid	0	0	0	1	0	0
Sodium chloride, liquid	0	0	0	1	0	0	Sodium chloride, liquid	0	0	0	1	0	0	Sodium chloride, liquid	0	0	0	1	0	0	Sodium chloride, liquid	0	0	0	1	0	0	Sodium chloride, liquid	0	0	0	1	0	0
Sodium hydroxide, liquid	0	0	0	1	0	0	Sodium hydroxide, liquid	0	0	0	1	0	0	Sodium hydroxide, liquid	0	0	0	1	0	0	Sodium hydroxide, liquid	0	0	0	1	0	0	Sodium hydroxide, liquid	0	0	0	1	0	0
Sodium hypochlorite, liquid	0	0	0	1	0	0	Sodium hypochlorite, liquid	0	0	0	1	0	0	Sodium hypochlorite, liquid	0	0	0	1	0	0	Sodium hypochlorite, liquid	0	0	0	1	0	0	Sodium hypochlorite, liquid	0	0	0	1	0	0
sodium ion, liquid	0	0	0	1	0	0	sodium ion, liquid	0	0	0	1	0	0	sodium ion, liquid	0	0	0	1	0	0	sodium ion, liquid	0	0	0	1	0	0	sodium ion, liquid	0	0	0	1	0	0
Sodium sulfate, liquid	0	0	0	1	0	0	Sodium sulfate, liquid	0	0	0	1	0	0	Sodium sulfate, liquid	0	0	0	1	0	0	Sodium sulfate, liquid	0	0	0	1	0	0	Sodium sulfate, liquid	0	0	0	1	0	0
Solids, inorganic, liquid	0	0	0	1	0	0	Solids, inorganic, liquid	0	0	0	1	0	0	Solids, inorganic, liquid	0	0	0	1	0	0	Solids, inorganic, liquid	0	0	0	1	0	0	Solids, inorganic, liquid	0	0	0	1	0	0
Succinic acid, liquid	0	0	0	1	0	0	Succinic acid, liquid	0	0	0	1	0	0	Succinic acid, liquid	0	0	0	1	0	0	Succinic acid, liquid	0	0	0	1	0	0	Succinic acid, liquid	0	0	0	1	0	0
Sulfuric acid, liquid	0	0	0	1	0	0	Sulfuric acid, liquid	0	0	0	1	0	0	Sulfuric acid, liquid	0	0	0	1	0	0	Sulfuric acid, liquid	0	0	0	1	0	0	Sulfuric acid, liquid	0	0	0	1	0	0
TDS, liquid	0	0	0	1	0	0	TDS, liquid	0	0	0	1	0	0	TDS, liquid	0	0	0	1	0	0	TDS, liquid	0	0	0	1	0	0	TDS, liquid	0	0	0	1	0	0
tetrahydrofuran, liquid	0	0	0	1	0	0	tetrahydrofuran, liquid	0	0	0	1	0	0	tetrahydrofuran, liquid	0	0	0	1	0	0	tetrahydrofuran, liquid	0	0	0	1	0	0	tetrahydrofuran, liquid	0	0	0	1	0	0
triethyl phosphate, liquid	0	0	0	1	0	0	triethyl phosphate, liquid	0	0	0	1	0	0	triethyl phosphate, liquid	0	0	0	1	0	0	triethyl phosphate, liquid	0	0	0	1	0	0	triethyl phosphate, liquid	0	0	0	1	0	0
Water, liquid	0	0	0	1	0	0	Water, liquid	0	0	0	1	0	0	Water, liquid	0	0	0	1	0	0	Water, liquid	0	0	0	1	0	0	Water, liquid	0	0	0	1	0	0
Zinc, liquid	0	0	0	1	0	0	Zinc, liquid	0	0	0	1	0	0	Zinc, liquid	0	0	0	1	0	0	Zinc, liquid	0	0	0	1	0	0	Zinc, liquid	0	0	0	1	0	0
acetic acid, solid	0	0	0	1	0	0	acetic acid, solid	0	0	0	1	0	0	acetic acid, solid	0	0	0	1	0	0	acetic acid, solid	0	0	0	1	0	0	acetic acid, solid	0	0	0	1	0	0
acetic anhydride, solid	0	0	0	1	0	0	acetic anhydride, solid	0	0	0	1	0	0	acetic anhydride, solid	0	0	0	1	0	0	acetic anhydride, solid	0	0	0	1	0	0	acetic anhydride, solid	0	0	0	1	0	0
ARSENIC(V), solid	0	0	0	1	0	0	ARSENIC(V), solid	0	0	0	1	0	0	ARSENIC(V), solid	0	0	0	1	0	0	ARSENIC(V), solid	0	0	0	1	0	0	ARSENIC(V), solid	0	0	0	1	0	0
Boric acid, solid	0	0	0	1	0	0	Boric acid, solid	0	0	0	1	0	0	Boric acid, solid	0	0	0	1	0	0	Boric acid, solid	0	0	0	1	0	0	Boric acid, solid	0	0	0	1	0	0
Butanedioic Anhydride, solid	0	0	0	1	0	0	Butanedioic Anhydride, solid	0	0	0	1	0	0	Butanedioic Anhydride, solid	0	0	0	1	0	0	Butanedioic Anhydride, solid	0	0	0	1	0	0	Butanedioic Anhydride, solid	0	0	0	1	0	0
Butyric acid lactone, solid	0	0	0	1	0	0	Butyric acid lactone, solid	0	0	0	1	0	0	Butyric acid lactone, solid	0	0	0	1	0	0	Butyric acid lactone, solid	0	0	0	1	0	0	Butyric acid lactone, solid	0	0	0	1	0	0
Calcium carbonate, solid	0	0	0	1	0	0	Calcium carbonate, solid	0	0	0	1	0	0	Calcium carbonate, solid	0	0	0	1	0	0	Calcium carbonate, solid	0	0	0	1	0	0	Calcium carbonate, solid	0	0	0	1	0	0
calcium monoxide, solid	0	0	0	1	0	0	calcium monoxide, solid	0	0	0	1	0	0	calcium monoxide, solid	0	0	0	1	0	0	calcium monoxide, solid	0	0	0	1	0	0	calcium monoxide, solid	0	0	0	1	0	0
Calcium sulfate, solid	0	0	0	1	0	0	Calcium sulfate, solid	0	0	0	1	0	0	Calcium sulfate, solid	0	0	0	1	0	0	Calcium sulfate, solid	0	0	0	1	0	0	Calcium sulfate, solid	0	0	0	1	0	0
Clay, solid	0	0	0	1	0	0	Clay, solid	0	0	0	1	0	0	Clay, solid	0	0	0	1	0	0	Clay, solid	0	0	0	1	0	0	Clay, solid	0	0	0	1	0	0
Coke, solid	0	0	0	1	0	0	Coke, solid	0	0	0	1	0	0	Coke, solid	0	0	0	1	0	0	Coke, solid	0	0	0	1	0	0	Coke, solid	0	0	0	1	0	0
hazardous waste, solid	0	0	0	1	0	0	hazardous waste, solid	0	0	0	1	0	0	hazardous waste, solid	0	0	0	1	0	0	hazardous waste, solid	0	0	0	1	0	0	hazardous waste, solid	0	0	0	1	0	0
HPMCAS, solid	0	0	0	1	0	0	HPMCAS, solid	0	0	0	1	0	0	HPMCAS, solid	0	0	0	1	0	0	HPMCAS, solid	0	0	0	1	0	0	HPMCAS, solid	0	0	0	1	0	0
Hydrogen fluoride, solid	0	0	0	1	0	0	Hydrogen fluoride, solid	0	0	0	1	0	0	Hydrogen fluoride, solid	0	0	0	1	0	0	Hydrogen fluoride, solid	0	0	0	1	0	0	Hydrogen fluoride, solid	0	0	0	1	0	0
Impurities, solid	0	0	0	1	0	0	Impurities, solid	0	0	0	1	0	0	Impurities, solid	0	0	0	1	0	0	Impurities, solid	0	0	0	1	0	0	Impurities, solid	0	0	0	1	0	0
lead, solid	0	0	0	1	0	0	lead, solid	0	0	0	1	0	0	lead, solid	0	0	0	1	0	0	lead, solid	0	0	0	1	0	0	lead, solid	0	0	0	1	0	0
Magnesium hydroxide, solid	0	0	0	1	0	0	Magnesium hydroxide, solid	0	0	0	1	0	0	Magnesium hydroxide, solid	0	0	0	1	0	0	Magnesium hydroxide, solid	0	0	0	1	0	0	Magnesium hydroxide, solid	0	0	0	1	0	0
Maleic anhydride, solid	0	0	0	1	0	0	Maleic anhydride, solid	0	0	0	1	0	0	Maleic anhydride, solid	0	0	0	1	0	0	Maleic anhydride, solid	0	0	0	1	0	0	Maleic anhydride, solid	0	0	0	1	0	0
Mercury, solid	0	0	0	1	0	0	Mercury, solid	0	0	0	1	0	0	Mercury, solid	0	0	0	1	0	0	Mercury, solid	0	0	0	1	0	0	Mercury, solid	0	0	0	1	0	0
Mud, solid	0	0	0	1	0	0	Mud, solid	0	0	0	1	0	0	Mud, solid	0	0	0	1	0	0	Mud, solid	0	0	0	1	0	0	Mud, solid	0	0	0	1	0	0
Pd on CaCO3 5 wpct Pd, solid	0	0	0	1	0	0	Pd on CaCO3 5 wpct Pd, solid	0	0	0	1	0	0	Pd on CaCO3 5 wpct Pd, solid	0	0	0	1	0	0	Pd on CaCO3 5 wpct Pd, solid	0	0	0	1	0	0	Pd on CaCO3 5 wpct Pd, solid	0	0	0	1	0	0
phosphate ore, in ground, solid	0	0	0	1	0	0	phosphate ore, in ground, solid	0	0	0	1	0	0	phosphate ore, in ground, solid	0	0	0	1	0	0	phosphate ore, in ground, solid	0	0	0	1	0	0	phosphate ore, in ground, solid	0	0	0	1	0	0
Phosphate rock (pure), solid	0	0	0	1	0	0	Phosphate rock (pure), solid	0	0	0	1	0	0	Phosphate rock (pure), solid	0	0	0	1	0	0	Phosphate rock (pure), solid	0	0	0	1	0	0	Phosphate rock (pure), solid	0	0	0	1	0	0
Phosphogypsum, solid	0	0	0	1	0	0	Phosphogypsum, solid	0	0	0	1	0	0	Phosphogypsum, solid	0	0	0	1	0	0	Phosphogypsum, solid	0	0	0	1	0	0	Phosphogypsum, solid	0	0	0	1	0	0
Phosphoric acid, solid	0	0	0	1	0	0	Phosphoric acid, solid	0	0	0	1	0	0	Phosphoric acid, solid	0	0	0	1	0	0	Phosphoric acid, solid	0	0	0	1	0	0	Phosphoric acid, solid	0	0	0	1	0	0
Potassium chloride, solid	0	0	0	1	0	0	Potassium chloride, solid	0	0	0	1	0	0	Potassium chloride, solid	0	0	0	1	0	0	Potassium chloride, solid	0	0	0	1	0	0	Potassium chloride, solid	0	0	0	1	0	0
Silica, solid	0	0	0	1	0	0	Silica, solid	0	0	0	1	0	0	Silica, solid	0	0	0	1	0	0	Silica, solid	0	0	0	1	0	0	Silica, solid	0	0	0	1	0	0
sodium acetate, solid	0	0	0	1	0	0	sodium acetate, solid	0	0	0	1	0	0	sodium acetate, solid	0	0	0	1	0	0	sodium acetate, solid	0	0	0	1	0	0	sodium acetate, solid	0	0	0	1	0	0
Sodium chloride, solid	0	0	0	1	0	0	Sodium chloride, solid	0	0	0	1	0	0	Sodium chloride, solid	0	0	0	1	0	0	Sodium chloride, solid	0	0	0	1	0	0	Sodium chloride, solid	0	0	0	1	0	0
Solid waste, solid	0	0	0	1	0	0	Solid waste, solid	0	0	0	1	0	0	Solid waste, solid	0	0	0	1	0	0	Solid waste, solid	0	0	0	1	0	0	Solid waste, solid	0	0	0	1	0	0
starch suppressant, solid	0	0	0	1	0	0	starch suppressant, solid	0	0	0	1	0	0	starch suppressant, solid	0	0	0	1	0	0	starch suppressant, solid	0	0	0	1	0	0	starch suppressant, solid	0	0	0	1	0	0
Succinic acid, solid	0	0	0	1	0	0	Succinic acid, solid	0	0	0	1	0	0	Succinic acid, solid	0	0	0	1	0	0	Succinic acid, solid	0	0	0	1	0	0	Succinic acid, solid	0	0	0	1	0	0
Sulfuric acid, solid	0	0	0	1	0	0	Sulfuric acid, solid	0	0	0	1	0	0	Sulfuric acid, solid	0	0	0	1	0	0	Sulfuric acid, solid	0	0	0	1	0	0	Sulfuric acid, solid	0	0	0	1	0	0
suspended matter (unspecified), solid	0	0	0	1	0	0	suspended matter (unspecified), solid	0	0	0	1	0	0	suspended matter (unspecified), solid	0	0	0	1	0	0	suspended matter (unspecified), solid	0	0	0	1	0	0	suspended matter (unspecified), solid	0	0	0	1	0	0
thallium, solid	0	0	0	1	0	0	thallium, solid	0	0	0	1	0	0	thallium, solid	0	0	0	1	0	0	thallium, solid	0	0	0	1	0	0	thallium, solid	0	0	0	1	0	0
tincal (borax), solid	0	0	0	1	0	0	tincal (borax), solid	0	0	0	1	0	0	tincal (borax), solid	0	0	0	1	0	0	tincal (borax), solid	0	0	0	1	0	0	tincal (borax), solid	0	0	0	1	0	0
Vanadium, solid	0	0	0	1	0	0	Vanadium, solid	0	0	0	1	0	0	Vanadium, solid	0	0	0	1	0	0	Vanadium, solid	0	0	0	1	0	0	Vanadium, solid	0	0	0	1	0	0
Total raw materials, raw material	0	0	0	1	0	0	Total raw materials, raw material	0	0	0	1	0	0	Total raw materials, raw material	0	0	0	1	0	0	Total raw materials, raw material	0	0	0	1	0	0	Total raw materials, raw material	0	0	0	1	0	0
0	0	0	0	1	0	0	0	0	0	0	1	0	0	0	0	0	0	1	0	0	0	0	0	0	1	0	0	0	0	0	0	1	0	0
0	0	0	0	1	0	0	0	0	0	0	1	0	0	0	0	0	0	1	0	0	0	0	0	0	1	0	0	0	0	0	0	1	0	0
0	0	0	0	1	0	0	0	0	0	0	1	0	0	0	0	0	0	1	0	0	0	0	0	0	1	0	0	0	0	0	0	1	0	0
0	0	0	0	1	0	0	0	0	0	0	1	0	0	0	0	0	0	1	0	0	0	0	0	0	1	0	0	0	0	0	0	1	0	0
0	0	0	0	1	0	0	0	0	0	0	1	0	0	0	0	0	0	1	0	0	0	0	0	0	1	0	0	0	0	0	0	1	0	0
0	0	0	0	1	0	0	0	0	0	0	1	0	0	0	0	0	0	1	0	0	0	0	0	0	1	0	0	0	0	0	0	1	0	0
name, air	0	0	0	1	0	0	name, air	0	0	0	1	0	0	name, air	0	0	0	1	0	0	name, air	0	0	0	1	0	0	name, air	0	0	0	1	0	0
Total Air emissions, air	0	0	0	1	0	0	Total Air emissions, air	0	0	0	1	0	0	Total Air emissions, air	0	0	0	1	0	0	Total Air emissions, air	0	0	0	1	0	0	Total Air emissions, air	0	0	0	1	0	0
0	0	0	0	1	0	0	0	0	0	0	1	0	0	0	0	0	0	1	0	0	0	0	0	0	1	0	0	0	0	0	0	1	0	0
0	0	0	0	1	0	0	0	0	0	0	1	0	0	0	0	0	0	1	0	0	0	0	0	0	1	0	0	0	0	0	0	1	0	0
name, liquid	0	0	0	1	0	0	name, liquid	0	0	0	1	0	0	name, liquid	0	0	0	1	0	0	name, liquid	0	0	0	1	0	0	name, liquid	0	0	0	1	0	0
Total Water emissions, liquid	0	0	0	1	0	0	Total Water emissions, liquid	0	0	0	1	0	0	Total Water emissions, liquid	0	0	0	1	0	0	Total Water emissions, liquid	0	0	0	1	0	0	Total Water emissions, liquid	0	0	0	1	0	0
0	0	0	0	1	0	0	0	0	0	0	1	0	0	0	0	0	0	1	0	0	0	0	0	0	1	0	0	0	0	0	0	1	0	0
0	0	0	0	1	0	0	0	0	0	0	1	0	0	0	0	0	0	1	0	0	0	0	0	0	1	0	0	0	0	0	0	1	0	0
solid	0	0	0	1	0	0	solid	0	0	0	1	0	0	solid	0	0	0	1	0	0	solid	0	0	0	1	0	0	solid	0	0	0	1	0	0
Total Solid emissions, solid	0	0	0	1	0	0	Total Solid emissions, solid	0	0	0	1	0	0	Total Solid emissions, solid	0	0	0	1	0	0	Total Solid emissions, solid	0	0	0	1	0	0	Total Solid emissions, solid	0	0	0	1	0	0

## Sheet: CMC linear CT
Cradle to gate chemical tree for CMC linear (carboxymethylcellulose)
Key	Natural resources	Unallocated	Allocated
Level 1	Level 2	Level 3	Level 4	Level 5	Level 6	Level 7	Level 8	Level 9	Level 10	Level 11
carboxymethylcellulose	acetic acid	Carbon monoxide	Carbon dioxide	Natural gas	blue water
1000	4.79929	2.52443	1.26132	0.25991	0.084103
					Natural gas (unprocessed)
					0.265108
				nitrogen from air	Air (untreated)
				0.485106	0.485107
				oxygen from air	Air (untreated)
				0.215345	0.215346
				Water for rxn	Water (untreated)
				0.336332	0.336332
			Natural gas	blue water
			0.850883	0.275333
				Natural gas (unprocessed)
				0.867901
			Water for rxn	Water (untreated)
			0.515008	0.515008
		methanol	Natural gas	blue water
		2.63481	1.3554	0.438588
				Natural gas (unprocessed)
				1.38251
			oxygen from air	Air (untreated)
			1.35403	1.35404
			Water for rxn	Water (untreated)
			2.41806	2.41806
	cellulose	Dissolving pulp	biomass for pulp	blue water
	744.622	744.622	5274.68	4128.63
				N in DAP	diammonium phosphate (DAP)	Ammonia	Natural gas	blue water
				1.80008	4.07257	1.04584	0.215507	0.0697347
								Natural gas (unprocessed)
								0.219817
							nitrogen from air	Air (untreated)
							0.402229	0.40223
							oxygen from air	Air (untreated)
							0.178555	0.178556
							Water for rxn	Water (untreated)
							0.278873	0.278873
						Phosphoric acid	Phosphate rock	phosphate ore, in ground
						3.00841	6.52272	22.7457
							Sulfuric acid	Sulfur trioxide	oxygen from air	Air (untreated)
							5.5909	4.5388	2.81896	2.81897
									Sulfur	oil (in ground)
									1.95726	2.01598
									Water for rxn	Water (untreated)
									0.170901	0.170901
								Water for rxn	Water (untreated)
								1.13521	1.13521
							Water for rxn	Water (untreated)
							1.76512	1.76512
				P in DAP	diammonium phosphate (DAP)	Ammonia	Natural gas	blue water
				1.98586	4.4929	1.15378	0.237749	0.076932
								Natural gas (unprocessed)
								0.242504
							nitrogen from air	Air (untreated)
							0.443743	0.443744
							oxygen from air	Air (untreated)
							0.196984	0.196984
							Water for rxn	Water (untreated)
							0.307655	0.307655
						Phosphoric acid	Phosphate rock	phosphate ore, in ground
						3.3189	7.19592	25.0932
							Sulfuric acid	Sulfur trioxide	oxygen from air	Air (untreated)
							6.16793	5.00725	3.10991	3.10991
									Sulfur	oil (in ground)
									2.15927	2.22405
									Water for rxn	Water (untreated)
									0.188539	0.188539
								Water for rxn	Water (untreated)
								1.25237	1.25237
							Water for rxn	Water (untreated)
							1.9473	1.9473
				Urea	Ammonia	Natural gas	blue water
				5.19793	2.94307	0.606453	0.196239
							Natural gas (unprocessed)
							0.618582
						nitrogen from air	Air (untreated)
						1.13191	1.13191
						oxygen from air	Air (untreated)
						0.502469	0.50247
						Water for rxn	Water (untreated)
						0.78477	0.78477
					Carbon dioxide	Natural gas	blue water
					3.8028	0.783612	0.253565
							Natural gas (unprocessed)
							0.799284
						nitrogen from air	Air (untreated)
						1.46256	1.46256
						oxygen from air	Air (untreated)
						0.649252	0.649253
						Water for rxn	Water (untreated)
						1.01402	1.01402
			calcium monoxide	Calcium carbonate	Limestone (in ground)
			20.777	41.5541	44.681
			hydrogen peroxide	Benzene	pyrolysis gas	Naphtha	blue water
			20.1068	1.53722	0.446269	0.455006	1.27584
							oil (in ground)
							0.460921
					reformate, from naphtha	Naphtha	blue water
					1.09539	1.11192	3.11783
							oil (in ground)
							1.12638
				Hydrogen	hydrogen from SMR natural gas	Methane	Natural gas	blue water
				1.26052	1.26052	2.63921	2.67062	0.864174
								Natural gas (unprocessed)
								2.72404
						oxygen from air	Air (untreated)
						0.467737	0.467737
						Water for rxn	Water (untreated)
						5.74999	5.74999
				oxygen from air	Air (untreated)
				30.7443	30.7444
			Methane	Natural gas	blue water
			3.35113	3.39102	1.09728
					Natural gas (unprocessed)
					3.45884
			oxygen from air	Air (untreated)
			3003.86	3003.86
			Sodium chlorate	sodium chloride in brine 26 wtpct	salt rock, in ground
			38.2029	85.7692	85.7692
			Sodium hydroxide	sodium chloride in brine 26 wtpct	salt rock, in ground
			128.013	103.62	103.62
				Water for rxn	Water (untreated)
				30.2461	30.2461
			Sodium sulfate	Sulfuric acid	Sulfur trioxide	oxygen from air	Air (untreated)
			14.0748	4.0289	3.27074	2.03139	2.0314
						Sulfur	oil (in ground)
						1.41044	1.45275
						Water for rxn	Water (untreated)
						0.123154	0.123154
					Water for rxn	Water (untreated)
					0.818052	0.818052
				tincal (borax)	B2O3 in tincal ore	borax ore (in ground)
				15.8341	6.3782	24.5315
			Sulfuric acid	Sulfur trioxide	oxygen from air	Air (untreated)
			34.8518	28.2934	17.5725	17.5725
					Sulfur	oil (in ground)
					12.2009	12.5669
					Water for rxn	Water (untreated)
					1.06534	1.06534
				Water for rxn	Water (untreated)
				7.07652	7.07652
	ethanol	Corn	K in Fertilizer	Potassium chloride	Sylvinite ore	sylvinite ore (in ground)
	34.5097	55.8367	0.320093	0.642756	1.88473	1.88473
			N in fertilizer	Ammonia	Natural gas	blue water
			1.03298	0.671436	0.138357	0.0447703
						Natural gas (unprocessed)
						0.141124
					nitrogen from air	Air (untreated)
					0.258235	0.258235
					oxygen from air	Air (untreated)
					0.114634	0.114634
					Water for rxn	Water (untreated)
					0.179039	0.179039
				N in DAP	diammonium phosphate (DAP)	Ammonia	Natural gas	blue water
				0.102265	0.231368	0.0594154	0.0122432	0.00396172
								Natural gas (unprocessed)
								0.0124881
							nitrogen from air	Air (untreated)
							0.0228512	0.0228512
							oxygen from air	Air (untreated)
							0.010144	0.010144
							Water for rxn	Water (untreated)
							0.0158431	0.0158431
						Phosphoric acid	Phosphate rock	phosphate ore, in ground
						0.170912	0.370564	1.29221
							Sulfuric acid	Sulfur trioxide	oxygen from air	Air (untreated)
							0.317627	0.257856	0.160149	0.160149
									Sulfur	oil (in ground)
									0.111195	0.114531
									Water for rxn	Water (untreated)
									0.0097091	0.0097091
								Water for rxn	Water (untreated)
								0.0644928	0.0644928
							Water for rxn	Water (untreated)
							0.100279	0.100279
				Urea	Ammonia	Natural gas	blue water
				0.824317	0.466728	0.0961748	0.0311207
							Natural gas (unprocessed)
							0.0980983
						nitrogen from air	Air (untreated)
						0.179504	0.179504
						oxygen from air	Air (untreated)
						0.0796844	0.0796846
						Water for rxn	Water (untreated)
						0.124453	0.124453
					Carbon dioxide	Natural gas	blue water
					0.60307	0.12427	0.0402118
							Natural gas (unprocessed)
							0.126755
						nitrogen from air	Air (untreated)
						0.231941	0.231942
						oxygen from air	Air (untreated)
						0.102962	0.102962
						Water for rxn	Water (untreated)
						0.160809	0.160809
			P in fertilizer	P in DAP	diammonium phosphate (DAP)	Ammonia	Natural gas	blue water
			0.204539	0.204539	0.462757	0.118836	0.0244875	0.00792379
								Natural gas (unprocessed)
								0.0249773
							nitrogen from air	Air (untreated)
							0.0457044	0.0457045
							oxygen from air	Air (untreated)
							0.0202888	0.0202889
							Water for rxn	Water (untreated)
							0.0316877	0.0316877
						Phosphoric acid	Phosphate rock	phosphate ore, in ground
						0.341838	0.741161	2.58454
							Sulfuric acid	Sulfur trioxide	oxygen from air	Air (untreated)
							0.635281	0.515734	0.320312	0.320313
									Sulfur	oil (in ground)
									0.222399	0.229071
									Water for rxn	Water (untreated)
									0.0194191	0.019419
								Water for rxn	Water (untreated)
								0.128991	0.128991
							Water for rxn	Water (untreated)
							0.200567	0.200567
		Water for rxn	Water (untreated)
		3.58901	3.58901
	isopropanol	Propylene	Naphtha	blue water
	55.8403	51.3731	52.3789	146.87
				oil (in ground)
				53.0598
		Sulfuric acid	Sulfur trioxide	oxygen from air	Air (untreated)
		20.0467	16.2743	10.1076	10.1077
				Sulfur	oil (in ground)
				7.01794	7.22848
				Water for rxn	Water (untreated)
				0.61278	0.61278
			Water for rxn	Water (untreated)
			4.0704	4.0704
		Water for rxn	Water (untreated)
		17.4222	17.4222
	Sodium Chloroacetate	Chloroacetic Acid	acetic acid	Carbon monoxide	Carbon dioxide	Natural gas	blue water
	856.775	694.981	294.616	154.968	77.4294	15.9552	5.16287
							Natural gas (unprocessed)
							16.2743
						nitrogen from air	Air (untreated)
						29.7794	29.7795
						oxygen from air	Air (untreated)
						13.2195	13.2195
						Water for rxn	Water (untreated)
						20.6466	20.6466
					Natural gas	blue water
					52.2336	16.902
						Natural gas (unprocessed)
						53.2783
					Water for rxn	Water (untreated)
					31.6151	31.6151
				methanol	Natural gas	blue water
				161.744	83.2049	26.9238
						Natural gas (unprocessed)
						84.869
					oxygen from air	Air (untreated)
					83.1208	83.1209
					Water for rxn	Water (untreated)
					148.439	148.439
			acetic anhydride	acetic acid	Carbon monoxide	Carbon dioxide	Natural gas	blue water
			143.38	181.591	95.5167	47.7247	9.83422	3.18221
								Natural gas (unprocessed)
								10.0309
							nitrogen from air	Air (untreated)
							18.3549	18.355
							oxygen from air	Air (untreated)
							8.14802	8.14803
							Water for rxn	Water (untreated)
							12.7258	12.7258
						Natural gas	blue water
						32.1949	10.4178
							Natural gas (unprocessed)
							32.8388
						Water for rxn	Water (untreated)
						19.4864	19.4864
					methanol	Natural gas	blue water
					99.6933	51.2844	16.5949
							Natural gas (unprocessed)
							52.3101
						oxygen from air	Air (untreated)
						51.2326	51.2327
						Water for rxn	Water (untreated)
						91.4923	91.4923
			Chlorine	sodium chloride in brine 26 wtpct	salt rock, in ground
			339.948	275.169	275.169
				Water for rxn	Water (untreated)
				80.3205	80.3205
		Sodium carbonate	Ammonia	Natural gas	blue water
		389.778	62.6109	12.9017	4.1748
					Natural gas (unprocessed)
					13.1597
				nitrogen from air	Air (untreated)
				24.0802	24.0803
				oxygen from air	Air (untreated)
				10.6895	10.6896
				Water for rxn	Water (untreated)
				16.6952	16.6952
			Carbon dioxide	Natural gas	blue water
			161.795	33.3397	10.7882
					Natural gas (unprocessed)
					34.0065
				nitrogen from air	Air (untreated)
				62.2264	62.2265
				oxygen from air	Air (untreated)
				27.6232	27.6232
				Water for rxn	Water (untreated)
				43.1426	43.1426
			Sodium chloride	salt rock, in ground
			216.455	276.196
			Water for rxn	Water (untreated)
			33.3925	33.3925
	Sodium hydroxide	sodium chloride in brine 26 wtpct	salt rock, in ground
	459.643	372.055	372.055
		Water for rxn	Water (untreated)
		108.601	108.601

## Sheet: CMC linear CC
Material:	CMC linear (carboxymethylcellulose)
Date:	5Jun2024
GWP 100, kg CO2							Acidification, kg SO2							Eutrophication, kg N							OzoneDepletion, kg CFC-11							Smog, kg O3
Chemicals	Total impact	Energy impact	Process impact	Cumulative impact	Process / Total this chemical	Process / Total this category	Chemicals	Total impact	Energy impact	Process impact	Cumulative impact	Process / Total this chemical	Process / Total this category	Chemicals	Total impact	Energy impact	Process impact	Cumulative impact	Process / Total this chemical	Process / Total this category	Chemicals	Total impact	Energy impact	Process impact	Cumulative impact	Process / Total this chemical	Process / Total this category	Chemicals	Total impact	Energy impact	Process impact	Cumulative impact	Process / Total this chemical	Process / Total this category
Total	5165.94	5883.25	-717.31			0.0770573	Total	35.7376	27.5748	8.16279			0.228409	Total	2.48595	0.684122	1.80183			0.724804	Total	1.81609e-05	1.81609e-05	0			0	Total	632.436	368.618	263.818			0.417145
Carbon dioxide, air	5823.47	5485.99	-871.024	0.913564	0.0579525	0.0529433	sulfur dioxide, air	17.6235	17.2348	0.388732	0.493135	0.0220576	0.0108774	Ammonia, liquid	0.930972	0.00158682	0.929385	0.374493	0.998296	0.373855	methyl bromide, air	1.32774e-05	1.32774e-05	0	0.7311	0	0	NOx, air	360.057	351.023	9.03322	0.569317	0.0250883	0.0142832
Methane, air	545.063	395.046	150.018	0.999072	0.27523	0.0235342	NOx, air	10.1655	9.91048	0.255036	0.777584	0.0250883	0.00713634	NOx, air	0.643187	0.62705	0.0161365	0.633222	0.0250883	0.00649108	methyl chloride, air	1.78923e-06	1.78923e-06	0	0.829621	0	0	Chlorine, air	77.8064	0	77.8064	0.692343	1	0.123026
Nitrous oxide, air	5.87556	2.17983	3.69573	0.999994	0.629001	0.000579772	Ammonia, air	3.90253	0.0628904	3.83964	0.886783	0.983885	0.10744	ammonium as N, liquid	0.501097	0	0.501097	0.834794	1	0.201572	Methyl chloroform, air	9.21583e-07	9.21583e-07	0	0.880367	0	0	Propylene, air	60.6034	0	60.6034	0.788168	1	0.0958254
chlorodifluoromethane, air	0.032758	0.032758	0	0.999999	0	0	SOx, air	1.47631	0.0214667	1.45485	0.928093	0.985459	0.0407091	Ammonia, air	0.246191	0.00396745	0.242224	0.933827	0.983885	0.0974372	chlorodifluoromethane, air	9.04918e-07	9.04918e-07	0	0.930195	0	0	ethanol, air	38.5458	0	38.5458	0.849117	1	0.0609481
CFC-113, air	0.00200702	0.00200702	0	0.999999	0	0	Nitric oxide, air	0.945819	0.320612	0.625208	0.954558	0.661022	0.0174944	Nitric oxide, air	0.0606208	0.0205491	0.0400717	0.958212	0.661022	0.0161193	carbon tetrachloride, air	7.12381e-07	7.12381e-07	0	0.969421	0	0	Nitric oxide, air	21.9161	7.42908	14.4871	0.88377	0.661022	0.0229067
carbon tetrachloride, air	0.00136621	0.00136621	0	0.999999	0	0	Hydrogen chloride, air	0.691366	0	0.691366	0.973904	1	0.0193456	Nitrogen dioxide, air	0.0413845	0.0015593	0.0398252	0.97486	0.962322	0.0160201	CFC-113, air	3.27409e-07	3.27409e-07	0	0.987449	0	0	isopropanol, air	16.0411	0	16.0411	0.909134	1	0.0253639
methyl chloride, air	0.001163	0.001163	0	1	0	0	Nitrogen dioxide, air	0.654079	0.0246446	0.629435	0.992206	0.962322	0.0176127	Phosphate-P, liquid	0.0253715	0	0.0253715	0.985066	1	0.010206	CFC-114, air	1.15264e-07	1.15264e-07	0	0.993796	0	0	Nitrogen dioxide, air	15.7403	0.593068	15.1472	0.934022	0.962322	0.0239506
CFC-114, air	0.00115264	0.00115264	0	1	0	0	Sulfur trioxide, air	0.278533	0	0.278533	1	1	0.00779382	Phosphorus emission, liquid	0.0123864	0.0123864	0	0.990048	0	0	CFC-11, air	1.12674e-07	1.12674e-07	0	1	0	0	Ethylene, air	10.6501	0	10.6501	0.950862	1	0.0168398
Methyl chloroform, air	0.00112126	0.00112126	0	1	0	0	Hydrogen fluoride, air	1.29135e-06	0	1.29135e-06	1	1	3.61342e-08	nitrogen, atomic, liquid	0.010245	0.010245	0	0.99417	0	0	Air (untreated), raw material	0	0	0	1	0	0	NMVOC, air	8.59172	7.29804	1.29368	0.964447	0.150573	0.00204555
CFC-11, air	0.000535202	0.000535202	0	1	0	0	Air (untreated), raw material	0	0	0	1	0	0	BOD5, liquid	0.00715399	0	0.00715399	0.997047	1	0.00287777	bauxite ore (in ground), raw material	0	0	0	1	0	0	acetic acid, air	8.13183	0	8.13183	0.977305	1	0.0128579
methyl bromide, air	0.000130171	0.000130171	0	1	0	0	bauxite ore (in ground), raw material	0	0	0	1	0	0	nitrogen, atomic, air	0.00677566	0.00677566	0	0.999773	0	0	blue water, raw material	0	0	0	1	0	0	Naphtha, air	4.02741	0	4.02741	0.983673	1	0.00636809
Air (untreated), raw material	0	0	0	1	0	0	blue water, raw material	0	0	0	1	0	0	COD, liquid	0.000560243	0	0.000560243	0.999998	1	0.000225364	borax ore (in ground), raw material	0	0	0	1	0	0	Benzene, air	2.21981	1.10479	1.11502	0.987183	0.502305	0.00176306
bauxite ore (in ground), raw material	0	0	0	1	0	0	borax ore (in ground), raw material	0	0	0	1	0	0	BOD, liquid	4.37148e-06	2.39525e-06	1.97624e-06	1	0.452074	7.94962e-07	coal (in ground), raw material	0	0	0	1	0	0	Diisopropyl Ether, air	1.96549	0	1.96549	0.990291	1	0.00310781
blue water, raw material	0	0	0	1	0	0	coal (in ground), raw material	0	0	0	1	0	0	Air (untreated), raw material	0	0	0	1	0	0	Limestone (in ground), raw material	0	0	0	1	0	0	methanol, air	1.77002	0	1.77002	0.99309	1	0.00279873
borax ore (in ground), raw material	0	0	0	1	0	0	Limestone (in ground), raw material	0	0	0	1	0	0	bauxite ore (in ground), raw material	0	0	0	1	0	0	Natural gas (unprocessed), raw material	0	0	0	1	0	0	pyrolysis gas, air	1.23714	0	1.23714	0.995046	1	0.00195615
coal (in ground), raw material	0	0	0	1	0	0	Natural gas (unprocessed), raw material	0	0	0	1	0	0	blue water, raw material	0	0	0	1	0	0	oil (in ground), raw material	0	0	0	1	0	0	Ethylene carbonate, air	0.874637	0	0.874637	0.996429	1	0.00138296
Limestone (in ground), raw material	0	0	0	1	0	0	oil (in ground), raw material	0	0	0	1	0	0	borax ore (in ground), raw material	0	0	0	1	0	0	phosphate ore, in ground, raw material	0	0	0	1	0	0	Carbon monoxide, air	0.784916	0.518807	0.266108	0.99767	0.339028	0.000420767
Natural gas (unprocessed), raw material	0	0	0	1	0	0	phosphate ore, in ground, raw material	0	0	0	1	0	0	coal (in ground), raw material	0	0	0	1	0	0	salt rock, in ground, raw material	0	0	0	1	0	0	isoprene, air	0.398772	0.398772	0	0.998301	0	0
oil (in ground), raw material	0	0	0	1	0	0	salt rock, in ground, raw material	0	0	0	1	0	0	Limestone (in ground), raw material	0	0	0	1	0	0	sand (in ground), raw material	0	0	0	1	0	0	Methane, air	0.313509	0.227222	0.0862871	0.998796	0.27523	0.000136436
phosphate ore, in ground, raw material	0	0	0	1	0	0	sand (in ground), raw material	0	0	0	1	0	0	Natural gas (unprocessed), raw material	0	0	0	1	0	0	sylvinite ore (in ground), raw material	0	0	0	1	0	0	Butene, air	0.172838	0	0.172838	0.99907	1	0.000273288
salt rock, in ground, raw material	0	0	0	1	0	0	sylvinite ore (in ground), raw material	0	0	0	1	0	0	oil (in ground), raw material	0	0	0	1	0	0	Uranium, raw material	0	0	0	1	0	0	methyl acetate, air	0.157107	0	0.157107	0.999318	1	0.000248416
sand (in ground), raw material	0	0	0	1	0	0	Uranium, raw material	0	0	0	1	0	0	phosphate ore, in ground, raw material	0	0	0	1	0	0	Water (untreated), raw material	0	0	0	1	0	0	Ethane, air	0.138192	0	0.138192	0.999536	1	0.000218508
sylvinite ore (in ground), raw material	0	0	0	1	0	0	Water (untreated), raw material	0	0	0	1	0	0	salt rock, in ground, raw material	0	0	0	1	0	0	0	0	0	0	1	0	0	1,3-butadiene, air	0.129384	0	0.129384	0.999741	1	0.00020458
Uranium, raw material	0	0	0	1	0	0	0	0	0	0	1	0	0	sand (in ground), raw material	0	0	0	1	0	0	0	0	0	0	1	0	0	Propane, air	0.080428	0	0.080428	0.999868	1	0.000127172
Water (untreated), raw material	0	0	0	1	0	0	0	0	0	0	1	0	0	sylvinite ore (in ground), raw material	0	0	0	1	0	0	0	0	0	0	1	0	0	formaldehyde, air	0.0253086	0.0253086	0	0.999908	0	0
0	0	0	0	1	0	0	0	0	0	0	1	0	0	Uranium, raw material	0	0	0	1	0	0	0	0	0	0	1	0	0	toluene, air	0.0121899	0	0.0121899	0.999928	1	1.92745e-05
0	0	0	0	1	0	0	0	0	0	0	1	0	0	Water (untreated), raw material	0	0	0	1	0	0	0	0	0	0	1	0	0	High alkanes, air	0.00976946	0	0.00976946	0.999943	1	1.54473e-05
0	0	0	0	1	0	0	0	0	0	0	1	0	0	0	0	0	0	1	0	0	0	0	0	0	1	0	0	Propyne, air	0.00827486	0	0.00827486	0.999956	1	1.30841e-05
0	0	0	0	1	0	0	0	0	0	0	1	0	0	0	0	0	0	1	0	0	0	0	0	0	1	0	0	n-hexane, air	0.00735476	0	0.00735476	0.999968	1	1.16293e-05
0	0	0	0	1	0	0	0	0	0	0	1	0	0	0	0	0	0	1	0	0	0	0	0	0	1	0	0	Butane, air	0.00723937	0	0.00723937	0.999979	1	1.14468e-05
0	0	0	0	1	0	0	0	0	0	0	1	0	0	0	0	0	0	1	0	0	0	0	0	0	1	0	0	cyclohexane, air	0.00520202	0	0.00520202	0.999987	1	8.22537e-06
0	0	0	0	1	0	0	0	0	0	0	1	0	0	0	0	0	0	1	0	0	0	0	0	0	1	0	0	Acetaldehyde, air	0.0032405	0	0.0032405	0.999992	1	5.12383e-06
0	0	0	0	1	0	0	0	0	0	0	1	0	0	0	0	0	0	1	0	0	0	0	0	0	1	0	0	heptane, air	0.00144144	0	0.00144144	0.999995	1	2.27918e-06
0	0	0	0	1	0	0	0	0	0	0	1	0	0	0	0	0	0	1	0	0	0	0	0	0	1	0	0	Acetylene, air	0.0013113	0	0.0013113	0.999997	1	2.07342e-06
0	0	0	0	1	0	0	0	0	0	0	1	0	0	0	0	0	0	1	0	0	0	0	0	0	1	0	0	n-Pentane, air	0.00105009	0	0.00105009	0.999998	1	1.66039e-06
0	0	0	0	1	0	0	0	0	0	0	1	0	0	0	0	0	0	1	0	0	0	0	0	0	1	0	0	Octane, air	0.000904522	0	0.000904522	1	1	1.43022e-06
0	0	0	0	1	0	0	0	0	0	0	1	0	0	0	0	0	0	1	0	0	0	0	0	0	1	0	0	Isobutane, air	5.69031e-05	0	5.69031e-05	1	1	8.99745e-08
0	0	0	0	1	0	0	0	0	0	0	1	0	0	0	0	0	0	1	0	0	0	0	0	0	1	0	0	methyl chloride, air	3.42824e-06	3.42824e-06	0	1	0	0
0	0	0	0	1	0	0	0	0	0	0	1	0	0	0	0	0	0	1	0	0	0	0	0	0	1	0	0	methyl bromide, air	4.87246e-07	4.87246e-07	0	1	0	0
0	0	0	0	1	0	0	0	0	0	0	1	0	0	0	0	0	0	1	0	0	0	0	0	0	1	0	0	Methyl chloroform, air	3.74757e-08	3.74757e-08	0	1	0	0
0	0	0	0	1	0	0	0	0	0	0	1	0	0	0	0	0	0	1	0	0	1,3-butadiene, air	0	0	0	1	0	0	Air (untreated), raw material	0	0	0	1	0	0
0	0	0	0	1	0	0	1,3-butadiene, air	0	0	0	1	0	0	0	0	0	0	1	0	0	Acetaldehyde, air	0	0	0	1	0	0	bauxite ore (in ground), raw material	0	0	0	1	0	0
0	0	0	0	1	0	0	Acetaldehyde, air	0	0	0	1	0	0	0	0	0	0	1	0	0	acetic acid, air	0	0	0	1	0	0	blue water, raw material	0	0	0	1	0	0
1,3-butadiene, air	0	0	0	1	0	0	acetic acid, air	0	0	0	1	0	0	0	0	0	0	1	0	0	acetic anhydride, air	0	0	0	1	0	0	borax ore (in ground), raw material	0	0	0	1	0	0
Acetaldehyde, air	0	0	0	1	0	0	acetic anhydride, air	0	0	0	1	0	0	0	0	0	0	1	0	0	Acetylene, air	0	0	0	1	0	0	coal (in ground), raw material	0	0	0	1	0	0
acetic acid, air	0	0	0	1	0	0	Acetylene, air	0	0	0	1	0	0	1,3-butadiene, air	0	0	0	1	0	0	Ammonia, air	0	0	0	1	0	0	Limestone (in ground), raw material	0	0	0	1	0	0
acetic anhydride, air	0	0	0	1	0	0	Argon, air	0	0	0	1	0	0	Acetaldehyde, air	0	0	0	1	0	0	Argon, air	0	0	0	1	0	0	Natural gas (unprocessed), raw material	0	0	0	1	0	0
Acetylene, air	0	0	0	1	0	0	Arsenic, air	0	0	0	1	0	0	acetic acid, air	0	0	0	1	0	0	Arsenic, air	0	0	0	1	0	0	oil (in ground), raw material	0	0	0	1	0	0
Ammonia, air	0	0	0	1	0	0	Benzene, air	0	0	0	1	0	0	acetic anhydride, air	0	0	0	1	0	0	Benzene, air	0	0	0	1	0	0	phosphate ore, in ground, raw material	0	0	0	1	0	0
Argon, air	0	0	0	1	0	0	beryllium, air	0	0	0	1	0	0	Acetylene, air	0	0	0	1	0	0	beryllium, air	0	0	0	1	0	0	salt rock, in ground, raw material	0	0	0	1	0	0
Arsenic, air	0	0	0	1	0	0	Boric acid, air	0	0	0	1	0	0	Argon, air	0	0	0	1	0	0	Boric acid, air	0	0	0	1	0	0	sand (in ground), raw material	0	0	0	1	0	0
Benzene, air	0	0	0	1	0	0	Butane, air	0	0	0	1	0	0	Arsenic, air	0	0	0	1	0	0	Butane, air	0	0	0	1	0	0	sylvinite ore (in ground), raw material	0	0	0	1	0	0
beryllium, air	0	0	0	1	0	0	Butene, air	0	0	0	1	0	0	Benzene, air	0	0	0	1	0	0	Butene, air	0	0	0	1	0	0	Uranium, raw material	0	0	0	1	0	0
Boric acid, air	0	0	0	1	0	0	cadmium, air	0	0	0	1	0	0	beryllium, air	0	0	0	1	0	0	cadmium, air	0	0	0	1	0	0	Water (untreated), raw material	0	0	0	1	0	0
Butane, air	0	0	0	1	0	0	Carbon dioxide, air	0	0	0	1	0	0	Boric acid, air	0	0	0	1	0	0	Carbon dioxide, air	0	0	0	1	0	0	0	0	0	0	1	0	0
Butene, air	0	0	0	1	0	0	Carbon dioxide, biogenic, air	0	0	0	1	0	0	Butane, air	0	0	0	1	0	0	Carbon dioxide, biogenic, air	0	0	0	1	0	0	0	0	0	0	1	0	0
cadmium, air	0	0	0	1	0	0	Carbon monoxide, air	0	0	0	1	0	0	Butene, air	0	0	0	1	0	0	Carbon monoxide, air	0	0	0	1	0	0	0	0	0	0	1	0	0
Carbon dioxide, biogenic, air	0	0	0	1	0	0	carbon tetrachloride, air	0	0	0	1	0	0	cadmium, air	0	0	0	1	0	0	carbon tetrafluoride, air	0	0	0	1	0	0	0	0	0	0	1	0	0
Carbon monoxide, air	0	0	0	1	0	0	carbon tetrafluoride, air	0	0	0	1	0	0	Carbon dioxide, air	0	0	0	1	0	0	Chlorine, air	0	0	0	1	0	0	0	0	0	0	1	0	0
carbon tetrafluoride, air	0	0	0	1	0	0	CFC-11, air	0	0	0	1	0	0	Carbon dioxide, biogenic, air	0	0	0	1	0	0	chromium, air	0	0	0	1	0	0	0	0	0	0	1	0	0
Chlorine, air	0	0	0	1	0	0	CFC-113, air	0	0	0	1	0	0	Carbon monoxide, air	0	0	0	1	0	0	chromium VI, air	0	0	0	1	0	0	0	0	0	0	1	0	0
chromium, air	0	0	0	1	0	0	CFC-114, air	0	0	0	1	0	0	carbon tetrachloride, air	0	0	0	1	0	0	COD, air	0	0	0	1	0	0	0	0	0	0	1	0	0
chromium VI, air	0	0	0	1	0	0	Chlorine, air	0	0	0	1	0	0	carbon tetrafluoride, air	0	0	0	1	0	0	cyclohexane, air	0	0	0	1	0	0	0	0	0	0	1	0	0
COD, air	0	0	0	1	0	0	chlorodifluoromethane, air	0	0	0	1	0	0	CFC-11, air	0	0	0	1	0	0	Diisopropyl Ether, air	0	0	0	1	0	0	0	0	0	0	1	0	0
cyclohexane, air	0	0	0	1	0	0	chromium, air	0	0	0	1	0	0	CFC-113, air	0	0	0	1	0	0	Ethane, air	0	0	0	1	0	0	0	0	0	0	1	0	0
Diisopropyl Ether, air	0	0	0	1	0	0	chromium VI, air	0	0	0	1	0	0	CFC-114, air	0	0	0	1	0	0	ethanol, air	0	0	0	1	0	0	0	0	0	0	1	0	0
Ethane, air	0	0	0	1	0	0	COD, air	0	0	0	1	0	0	Chlorine, air	0	0	0	1	0	0	Ethylene, air	0	0	0	1	0	0	0	0	0	0	1	0	0
ethanol, air	0	0	0	1	0	0	cyclohexane, air	0	0	0	1	0	0	chlorodifluoromethane, air	0	0	0	1	0	0	Ethylene carbonate, air	0	0	0	1	0	0	0	0	0	0	1	0	0
Ethylene, air	0	0	0	1	0	0	Diisopropyl Ether, air	0	0	0	1	0	0	chromium, air	0	0	0	1	0	0	formaldehyde, air	0	0	0	1	0	0	0	0	0	0	1	0	0
Ethylene carbonate, air	0	0	0	1	0	0	Ethane, air	0	0	0	1	0	0	chromium VI, air	0	0	0	1	0	0	gas from explosives, air	0	0	0	1	0	0	0	0	0	0	1	0	0
formaldehyde, air	0	0	0	1	0	0	ethanol, air	0	0	0	1	0	0	COD, air	0	0	0	1	0	0	heptane, air	0	0	0	1	0	0	0	0	0	0	1	0	0
gas from explosives, air	0	0	0	1	0	0	Ethylene, air	0	0	0	1	0	0	cyclohexane, air	0	0	0	1	0	0	HFC-152a, air	0	0	0	1	0	0	0	0	0	0	1	0	0
heptane, air	0	0	0	1	0	0	Ethylene carbonate, air	0	0	0	1	0	0	Diisopropyl Ether, air	0	0	0	1	0	0	High alkanes, air	0	0	0	1	0	0	acetic anhydride, air	0	0	0	1	0	0
HFC-152a, air	0	0	0	1	0	0	formaldehyde, air	0	0	0	1	0	0	Ethane, air	0	0	0	1	0	0	Hydrogen, air	0	0	0	1	0	0	Ammonia, air	0	0	0	1	0	0
High alkanes, air	0	0	0	1	0	0	gas from explosives, air	0	0	0	1	0	0	ethanol, air	0	0	0	1	0	0	Hydrogen chloride, air	0	0	0	1	0	0	Argon, air	0	0	0	1	0	0
Hydrogen, air	0	0	0	1	0	0	heptane, air	0	0	0	1	0	0	Ethylene, air	0	0	0	1	0	0	Hydrogen fluoride, air	0	0	0	1	0	0	Arsenic, air	0	0	0	1	0	0
Hydrogen chloride, air	0	0	0	1	0	0	HFC-152a, air	0	0	0	1	0	0	Ethylene carbonate, air	0	0	0	1	0	0	Hydrogen sulfide, air	0	0	0	1	0	0	beryllium, air	0	0	0	1	0	0
Hydrogen fluoride, air	0	0	0	1	0	0	High alkanes, air	0	0	0	1	0	0	formaldehyde, air	0	0	0	1	0	0	Isobutane, air	0	0	0	1	0	0	Boric acid, air	0	0	0	1	0	0
Hydrogen sulfide, air	0	0	0	1	0	0	Hydrogen, air	0	0	0	1	0	0	gas from explosives, air	0	0	0	1	0	0	isoprene, air	0	0	0	1	0	0	cadmium, air	0	0	0	1	0	0
Isobutane, air	0	0	0	1	0	0	Hydrogen sulfide, air	0	0	0	1	0	0	heptane, air	0	0	0	1	0	0	isopropanol, air	0	0	0	1	0	0	Carbon dioxide, air	0	0	0	1	0	0
isoprene, air	0	0	0	1	0	0	Isobutane, air	0	0	0	1	0	0	HFC-152a, air	0	0	0	1	0	0	ketene, air	0	0	0	1	0	0	Carbon dioxide, biogenic, air	0	0	0	1	0	0
isopropanol, air	0	0	0	1	0	0	isoprene, air	0	0	0	1	0	0	High alkanes, air	0	0	0	1	0	0	lead, air	0	0	0	1	0	0	carbon tetrachloride, air	0	0	0	1	0	0
ketene, air	0	0	0	1	0	0	isopropanol, air	0	0	0	1	0	0	Hydrogen, air	0	0	0	1	0	0	Mercury, air	0	0	0	1	0	0	carbon tetrafluoride, air	0	0	0	1	0	0
lead, air	0	0	0	1	0	0	ketene, air	0	0	0	1	0	0	Hydrogen chloride, air	0	0	0	1	0	0	metals (unspecified), air	0	0	0	1	0	0	CFC-11, air	0	0	0	1	0	0
Mercury, air	0	0	0	1	0	0	lead, air	0	0	0	1	0	0	Hydrogen fluoride, air	0	0	0	1	0	0	Methane, air	0	0	0	1	0	0	CFC-113, air	0	0	0	1	0	0
metals (unspecified), air	0	0	0	1	0	0	Mercury, air	0	0	0	1	0	0	Hydrogen sulfide, air	0	0	0	1	0	0	methanol, air	0	0	0	1	0	0	CFC-114, air	0	0	0	1	0	0
methanol, air	0	0	0	1	0	0	metals (unspecified), air	0	0	0	1	0	0	Isobutane, air	0	0	0	1	0	0	methyl acetate, air	0	0	0	1	0	0	chlorodifluoromethane, air	0	0	0	1	0	0
methyl acetate, air	0	0	0	1	0	0	Methane, air	0	0	0	1	0	0	isoprene, air	0	0	0	1	0	0	Naphtha, air	0	0	0	1	0	0	chromium, air	0	0	0	1	0	0
Naphtha, air	0	0	0	1	0	0	methanol, air	0	0	0	1	0	0	isopropanol, air	0	0	0	1	0	0	n-hexane, air	0	0	0	1	0	0	chromium VI, air	0	0	0	1	0	0
n-hexane, air	0	0	0	1	0	0	methyl acetate, air	0	0	0	1	0	0	ketene, air	0	0	0	1	0	0	nickel, air	0	0	0	1	0	0	COD, air	0	0	0	1	0	0
nickel, air	0	0	0	1	0	0	methyl bromide, air	0	0	0	1	0	0	lead, air	0	0	0	1	0	0	Nitric oxide, air	0	0	0	1	0	0	gas from explosives, air	0	0	0	1	0	0
Nitric oxide, air	0	0	0	1	0	0	methyl chloride, air	0	0	0	1	0	0	Mercury, air	0	0	0	1	0	0	Nitrogen dioxide, air	0	0	0	1	0	0	HFC-152a, air	0	0	0	1	0	0
Nitrogen dioxide, air	0	0	0	1	0	0	Methyl chloroform, air	0	0	0	1	0	0	metals (unspecified), air	0	0	0	1	0	0	nitrogen, atomic, air	0	0	0	1	0	0	Hydrogen, air	0	0	0	1	0	0
nitrogen, atomic, air	0	0	0	1	0	0	Naphtha, air	0	0	0	1	0	0	Methane, air	0	0	0	1	0	0	Nitrous oxide, air	0	0	0	1	0	0	Hydrogen chloride, air	0	0	0	1	0	0
NMVOC, air	0	0	0	1	0	0	n-hexane, air	0	0	0	1	0	0	methanol, air	0	0	0	1	0	0	NMVOC, air	0	0	0	1	0	0	Hydrogen fluoride, air	0	0	0	1	0	0
NOx, air	0	0	0	1	0	0	nickel, air	0	0	0	1	0	0	methyl acetate, air	0	0	0	1	0	0	NOx, air	0	0	0	1	0	0	Hydrogen sulfide, air	0	0	0	1	0	0
n-Pentane, air	0	0	0	1	0	0	nitrogen, atomic, air	0	0	0	1	0	0	methyl bromide, air	0	0	0	1	0	0	n-Pentane, air	0	0	0	1	0	0	ketene, air	0	0	0	1	0	0
Octane, air	0	0	0	1	0	0	Nitrous oxide, air	0	0	0	1	0	0	methyl chloride, air	0	0	0	1	0	0	Octane, air	0	0	0	1	0	0	lead, air	0	0	0	1	0	0
organic matter (unspecified), air	0	0	0	1	0	0	NMVOC, air	0	0	0	1	0	0	Methyl chloroform, air	0	0	0	1	0	0	organic matter (unspecified), air	0	0	0	1	0	0	Mercury, air	0	0	0	1	0	0
Particulate matter, air	0	0	0	1	0	0	n-Pentane, air	0	0	0	1	0	0	Naphtha, air	0	0	0	1	0	0	Particulate matter, air	0	0	0	1	0	0	metals (unspecified), air	0	0	0	1	0	0
particulate matter 2.5, air	0	0	0	1	0	0	Octane, air	0	0	0	1	0	0	n-hexane, air	0	0	0	1	0	0	particulate matter 2.5, air	0	0	0	1	0	0	nickel, air	0	0	0	1	0	0
perfluoroethane, air	0	0	0	1	0	0	organic matter (unspecified), air	0	0	0	1	0	0	nickel, air	0	0	0	1	0	0	perfluoroethane, air	0	0	0	1	0	0	nitrogen, atomic, air	0	0	0	1	0	0
PM10, air	0	0	0	1	0	0	Particulate matter, air	0	0	0	1	0	0	Nitrous oxide, air	0	0	0	1	0	0	PM10, air	0	0	0	1	0	0	Nitrous oxide, air	0	0	0	1	0	0
Propane, air	0	0	0	1	0	0	particulate matter 2.5, air	0	0	0	1	0	0	NMVOC, air	0	0	0	1	0	0	Propane, air	0	0	0	1	0	0	organic matter (unspecified), air	0	0	0	1	0	0
Propylene, air	0	0	0	1	0	0	perfluoroethane, air	0	0	0	1	0	0	n-Pentane, air	0	0	0	1	0	0	Propylene, air	0	0	0	1	0	0	Particulate matter, air	0	0	0	1	0	0
Propyne, air	0	0	0	1	0	0	PM10, air	0	0	0	1	0	0	Octane, air	0	0	0	1	0	0	Propyne, air	0	0	0	1	0	0	particulate matter 2.5, air	0	0	0	1	0	0
pyrolysis gas, air	0	0	0	1	0	0	Propane, air	0	0	0	1	0	0	organic matter (unspecified), air	0	0	0	1	0	0	pyrolysis gas, air	0	0	0	1	0	0	perfluoroethane, air	0	0	0	1	0	0
silver, air	0	0	0	1	0	0	Propylene, air	0	0	0	1	0	0	Particulate matter, air	0	0	0	1	0	0	silver, air	0	0	0	1	0	0	PM10, air	0	0	0	1	0	0
Sodium chlorate, air	0	0	0	1	0	0	Propyne, air	0	0	0	1	0	0	particulate matter 2.5, air	0	0	0	1	0	0	Sodium chlorate, air	0	0	0	1	0	0	silver, air	0	0	0	1	0	0
Sodium sulfate, air	0	0	0	1	0	0	pyrolysis gas, air	0	0	0	1	0	0	perfluoroethane, air	0	0	0	1	0	0	Sodium sulfate, air	0	0	0	1	0	0	Sodium chlorate, air	0	0	0	1	0	0
SOx, air	0	0	0	1	0	0	silver, air	0	0	0	1	0	0	PM10, air	0	0	0	1	0	0	SOx, air	0	0	0	1	0	0	Sodium sulfate, air	0	0	0	1	0	0
Sulfur, air	0	0	0	1	0	0	Sodium chlorate, air	0	0	0	1	0	0	Propane, air	0	0	0	1	0	0	Sulfur, air	0	0	0	1	0	0	SOx, air	0	0	0	1	0	0
sulfur dioxide, air	0	0	0	1	0	0	Sodium sulfate, air	0	0	0	1	0	0	Propylene, air	0	0	0	1	0	0	sulfur dioxide, air	0	0	0	1	0	0	Sulfur, air	0	0	0	1	0	0
Sulfur hexafluoride, air	0	0	0	1	0	0	Sulfur, air	0	0	0	1	0	0	Propyne, air	0	0	0	1	0	0	Sulfur hexafluoride, air	0	0	0	1	0	0	sulfur dioxide, air	0	0	0	1	0	0
Sulfur trioxide, air	0	0	0	1	0	0	Sulfur hexafluoride, air	0	0	0	1	0	0	pyrolysis gas, air	0	0	0	1	0	0	Sulfur trioxide, air	0	0	0	1	0	0	Sulfur hexafluoride, air	0	0	0	1	0	0
toluene, air	0	0	0	1	0	0	toluene, air	0	0	0	1	0	0	silver, air	0	0	0	1	0	0	toluene, air	0	0	0	1	0	0	Sulfur trioxide, air	0	0	0	1	0	0
Urea, air	0	0	0	1	0	0	Urea, air	0	0	0	1	0	0	Sodium chlorate, air	0	0	0	1	0	0	Urea, air	0	0	0	1	0	0	Urea, air	0	0	0	1	0	0
VOCs (unspecified), air	0	0	0	1	0	0	VOCs (unspecified), air	0	0	0	1	0	0	Sodium sulfate, air	0	0	0	1	0	0	VOCs (unspecified), air	0	0	0	1	0	0	VOCs (unspecified), air	0	0	0	1	0	0
Zinc, air	0	0	0	1	0	0	Zinc, air	0	0	0	1	0	0	SOx, air	0	0	0	1	0	0	Zinc, air	0	0	0	1	0	0	Zinc, air	0	0	0	1	0	0
Acetaldehyde, liquid	0	0	0	1	0	0	Acetaldehyde, liquid	0	0	0	1	0	0	Sulfur, air	0	0	0	1	0	0	Acetaldehyde, liquid	0	0	0	1	0	0	Acetaldehyde, liquid	0	0	0	1	0	0
acetic acid, liquid	0	0	0	1	0	0	acetic acid, liquid	0	0	0	1	0	0	sulfur dioxide, air	0	0	0	1	0	0	acetic acid, liquid	0	0	0	1	0	0	acetic acid, liquid	0	0	0	1	0	0
Acetic Acid Chloride, liquid	0	0	0	1	0	0	Acetic Acid Chloride, liquid	0	0	0	1	0	0	Sulfur hexafluoride, air	0	0	0	1	0	0	Acetic Acid Chloride, liquid	0	0	0	1	0	0	Acetic Acid Chloride, liquid	0	0	0	1	0	0
acetic anhydride, liquid	0	0	0	1	0	0	acetic anhydride, liquid	0	0	0	1	0	0	Sulfur trioxide, air	0	0	0	1	0	0	acetic anhydride, liquid	0	0	0	1	0	0	acetic anhydride, liquid	0	0	0	1	0	0
Ammonia, liquid	0	0	0	1	0	0	Ammonia, liquid	0	0	0	1	0	0	toluene, air	0	0	0	1	0	0	Ammonia, liquid	0	0	0	1	0	0	Ammonia, liquid	0	0	0	1	0	0
ammonium as N, liquid	0	0	0	1	0	0	ammonium as N, liquid	0	0	0	1	0	0	Urea, air	0	0	0	1	0	0	ammonium as N, liquid	0	0	0	1	0	0	ammonium as N, liquid	0	0	0	1	0	0
Arsenic, liquid	0	0	0	1	0	0	Arsenic, liquid	0	0	0	1	0	0	VOCs (unspecified), air	0	0	0	1	0	0	Arsenic, liquid	0	0	0	1	0	0	Arsenic, liquid	0	0	0	1	0	0
Atrazine, liquid	0	0	0	1	0	0	Atrazine, liquid	0	0	0	1	0	0	Zinc, air	0	0	0	1	0	0	Atrazine, liquid	0	0	0	1	0	0	Atrazine, liquid	0	0	0	1	0	0
barium, liquid	0	0	0	1	0	0	barium, liquid	0	0	0	1	0	0	Acetaldehyde, liquid	0	0	0	1	0	0	barium, liquid	0	0	0	1	0	0	barium, liquid	0	0	0	1	0	0
Benzene, liquid	0	0	0	1	0	0	Benzene, liquid	0	0	0	1	0	0	acetic acid, liquid	0	0	0	1	0	0	Benzene, liquid	0	0	0	1	0	0	Benzene, liquid	0	0	0	1	0	0
BOD, liquid	0	0	0	1	0	0	BOD, liquid	0	0	0	1	0	0	Acetic Acid Chloride, liquid	0	0	0	1	0	0	BOD, liquid	0	0	0	1	0	0	BOD, liquid	0	0	0	1	0	0
BOD5, liquid	0	0	0	1	0	0	BOD5, liquid	0	0	0	1	0	0	acetic anhydride, liquid	0	0	0	1	0	0	BOD5, liquid	0	0	0	1	0	0	BOD5, liquid	0	0	0	1	0	0
Boron, liquid	0	0	0	1	0	0	Boron, liquid	0	0	0	1	0	0	Arsenic, liquid	0	0	0	1	0	0	Boron, liquid	0	0	0	1	0	0	Boron, liquid	0	0	0	1	0	0
Carbon dioxide, liquid	0	0	0	1	0	0	Carbon dioxide, liquid	0	0	0	1	0	0	Atrazine, liquid	0	0	0	1	0	0	Carbon dioxide, liquid	0	0	0	1	0	0	Carbon dioxide, liquid	0	0	0	1	0	0
Carbon monoxide, liquid	0	0	0	1	0	0	Carbon monoxide, liquid	0	0	0	1	0	0	barium, liquid	0	0	0	1	0	0	Carbon monoxide, liquid	0	0	0	1	0	0	Carbon monoxide, liquid	0	0	0	1	0	0
carboxymethylcellulose, liquid	0	0	0	1	0	0	carboxymethylcellulose, liquid	0	0	0	1	0	0	Benzene, liquid	0	0	0	1	0	0	carboxymethylcellulose, liquid	0	0	0	1	0	0	carboxymethylcellulose, liquid	0	0	0	1	0	0
Chloride, liquid	0	0	0	1	0	0	Chloride, liquid	0	0	0	1	0	0	Boron, liquid	0	0	0	1	0	0	Chloride, liquid	0	0	0	1	0	0	Chloride, liquid	0	0	0	1	0	0
Chlorine, liquid	0	0	0	1	0	0	Chlorine, liquid	0	0	0	1	0	0	Carbon dioxide, liquid	0	0	0	1	0	0	Chlorine, liquid	0	0	0	1	0	0	Chlorine, liquid	0	0	0	1	0	0
Chlorine dioxide, liquid	0	0	0	1	0	0	Chlorine dioxide, liquid	0	0	0	1	0	0	Carbon monoxide, liquid	0	0	0	1	0	0	Chlorine dioxide, liquid	0	0	0	1	0	0	Chlorine dioxide, liquid	0	0	0	1	0	0
Chloroacetic Acid, liquid	0	0	0	1	0	0	Chloroacetic Acid, liquid	0	0	0	1	0	0	carboxymethylcellulose, liquid	0	0	0	1	0	0	Chloroacetic Acid, liquid	0	0	0	1	0	0	Chloroacetic Acid, liquid	0	0	0	1	0	0
chromium, liquid	0	0	0	1	0	0	chromium, liquid	0	0	0	1	0	0	Chloride, liquid	0	0	0	1	0	0	chromium, liquid	0	0	0	1	0	0	chromium, liquid	0	0	0	1	0	0
Chromium III, liquid	0	0	0	1	0	0	Chromium III, liquid	0	0	0	1	0	0	Chlorine, liquid	0	0	0	1	0	0	Chromium III, liquid	0	0	0	1	0	0	Chromium III, liquid	0	0	0	1	0	0
Chromium VI, liquid	0	0	0	1	0	0	Chromium VI, liquid	0	0	0	1	0	0	Chlorine dioxide, liquid	0	0	0	1	0	0	Chromium VI, liquid	0	0	0	1	0	0	Chromium VI, liquid	0	0	0	1	0	0
COD, liquid	0	0	0	1	0	0	COD, liquid	0	0	0	1	0	0	Chloroacetic Acid, liquid	0	0	0	1	0	0	COD, liquid	0	0	0	1	0	0	COD, liquid	0	0	0	1	0	0
diammonium phosphate (DAP), liquid	0	0	0	1	0	0	diammonium phosphate (DAP), liquid	0	0	0	1	0	0	chromium, liquid	0	0	0	1	0	0	diammonium phosphate (DAP), liquid	0	0	0	1	0	0	diammonium phosphate (DAP), liquid	0	0	0	1	0	0
Diisopropyl Ether, liquid	0	0	0	1	0	0	Diisopropyl Ether, liquid	0	0	0	1	0	0	Chromium III, liquid	0	0	0	1	0	0	Diisopropyl Ether, liquid	0	0	0	1	0	0	Diisopropyl Ether, liquid	0	0	0	1	0	0
dimethyl ether, liquid	0	0	0	1	0	0	dimethyl ether, liquid	0	0	0	1	0	0	Chromium VI, liquid	0	0	0	1	0	0	dimethyl ether, liquid	0	0	0	1	0	0	dimethyl ether, liquid	0	0	0	1	0	0
ethanecarboxylic acid, liquid	0	0	0	1	0	0	ethanecarboxylic acid, liquid	0	0	0	1	0	0	diammonium phosphate (DAP), liquid	0	0	0	1	0	0	ethanecarboxylic acid, liquid	0	0	0	1	0	0	ethanecarboxylic acid, liquid	0	0	0	1	0	0
ethanol, liquid	0	0	0	1	0	0	ethanol, liquid	0	0	0	1	0	0	Diisopropyl Ether, liquid	0	0	0	1	0	0	ethanol, liquid	0	0	0	1	0	0	ethanol, liquid	0	0	0	1	0	0
ethyl butanol, liquid	0	0	0	1	0	0	ethyl butanol, liquid	0	0	0	1	0	0	dimethyl ether, liquid	0	0	0	1	0	0	ethyl butanol, liquid	0	0	0	1	0	0	ethyl butanol, liquid	0	0	0	1	0	0
glycerol, liquid	0	0	0	1	0	0	glycerol, liquid	0	0	0	1	0	0	ethanecarboxylic acid, liquid	0	0	0	1	0	0	glycerol, liquid	0	0	0	1	0	0	glycerol, liquid	0	0	0	1	0	0
grease / oil, liquid	0	0	0	1	0	0	grease / oil, liquid	0	0	0	1	0	0	ethanol, liquid	0	0	0	1	0	0	grease / oil, liquid	0	0	0	1	0	0	grease / oil, liquid	0	0	0	1	0	0
heavy organics, liquid	0	0	0	1	0	0	heavy organics, liquid	0	0	0	1	0	0	ethyl butanol, liquid	0	0	0	1	0	0	heavy organics, liquid	0	0	0	1	0	0	heavy organics, liquid	0	0	0	1	0	0
Hydrogen, liquid	0	0	0	1	0	0	Hydrogen, liquid	0	0	0	1	0	0	glycerol, liquid	0	0	0	1	0	0	Hydrogen, liquid	0	0	0	1	0	0	Hydrogen, liquid	0	0	0	1	0	0
Hydrogen chloride, liquid	0	0	0	1	0	0	Hydrogen chloride, liquid	0	0	0	1	0	0	grease / oil, liquid	0	0	0	1	0	0	Hydrogen chloride, liquid	0	0	0	1	0	0	Hydrogen chloride, liquid	0	0	0	1	0	0
hydrogen peroxide, liquid	0	0	0	1	0	0	hydrogen peroxide, liquid	0	0	0	1	0	0	heavy organics, liquid	0	0	0	1	0	0	hydrogen peroxide, liquid	0	0	0	1	0	0	hydrogen peroxide, liquid	0	0	0	1	0	0
Iron (Fe++, Fe3+), liquid	0	0	0	1	0	0	Iron (Fe++, Fe3+), liquid	0	0	0	1	0	0	Hydrogen, liquid	0	0	0	1	0	0	Iron (Fe++, Fe3+), liquid	0	0	0	1	0	0	Iron (Fe++, Fe3+), liquid	0	0	0	1	0	0
isopropanol, liquid	0	0	0	1	0	0	isopropanol, liquid	0	0	0	1	0	0	Hydrogen chloride, liquid	0	0	0	1	0	0	isopropanol, liquid	0	0	0	1	0	0	isopropanol, liquid	0	0	0	1	0	0
lead, liquid	0	0	0	1	0	0	lead, liquid	0	0	0	1	0	0	hydrogen peroxide, liquid	0	0	0	1	0	0	lead, liquid	0	0	0	1	0	0	lead, liquid	0	0	0	1	0	0
methanol, liquid	0	0	0	1	0	0	methanol, liquid	0	0	0	1	0	0	Iron (Fe++, Fe3+), liquid	0	0	0	1	0	0	methanol, liquid	0	0	0	1	0	0	methanol, liquid	0	0	0	1	0	0
methyl acetate, liquid	0	0	0	1	0	0	methyl acetate, liquid	0	0	0	1	0	0	isopropanol, liquid	0	0	0	1	0	0	methyl acetate, liquid	0	0	0	1	0	0	methyl acetate, liquid	0	0	0	1	0	0
Methyl iodide, liquid	0	0	0	1	0	0	Methyl iodide, liquid	0	0	0	1	0	0	lead, liquid	0	0	0	1	0	0	Methyl iodide, liquid	0	0	0	1	0	0	Methyl iodide, liquid	0	0	0	1	0	0
Mobile ions, liquid	0	0	0	1	0	0	Mobile ions, liquid	0	0	0	1	0	0	methanol, liquid	0	0	0	1	0	0	Mobile ions, liquid	0	0	0	1	0	0	Mobile ions, liquid	0	0	0	1	0	0
nickel, liquid	0	0	0	1	0	0	nickel, liquid	0	0	0	1	0	0	methyl acetate, liquid	0	0	0	1	0	0	nickel, liquid	0	0	0	1	0	0	nickel, liquid	0	0	0	1	0	0
Nitrate-N, liquid	0	0	0	1	0	0	Nitrate-N, liquid	0	0	0	1	0	0	Methyl iodide, liquid	0	0	0	1	0	0	Nitrate-N, liquid	0	0	0	1	0	0	Nitrate-N, liquid	0	0	0	1	0	0
nitrogen, atomic, liquid	0	0	0	1	0	0	nitrogen, atomic, liquid	0	0	0	1	0	0	Mobile ions, liquid	0	0	0	1	0	0	nitrogen, atomic, liquid	0	0	0	1	0	0	nitrogen, atomic, liquid	0	0	0	1	0	0
Phosphate-P, liquid	0	0	0	1	0	0	Phosphate-P, liquid	0	0	0	1	0	0	nickel, liquid	0	0	0	1	0	0	Phosphate-P, liquid	0	0	0	1	0	0	Phosphate-P, liquid	0	0	0	1	0	0
Phosphorus emission, liquid	0	0	0	1	0	0	Phosphorus emission, liquid	0	0	0	1	0	0	Nitrate-N, liquid	0	0	0	1	0	0	Phosphorus emission, liquid	0	0	0	1	0	0	Phosphorus emission, liquid	0	0	0	1	0	0
Potassium chloride, liquid	0	0	0	1	0	0	Potassium chloride, liquid	0	0	0	1	0	0	Potassium chloride, liquid	0	0	0	1	0	0	Potassium chloride, liquid	0	0	0	1	0	0	Potassium chloride, liquid	0	0	0	1	0	0
pyrolysis gas, liquid	0	0	0	1	0	0	pyrolysis gas, liquid	0	0	0	1	0	0	pyrolysis gas, liquid	0	0	0	1	0	0	pyrolysis gas, liquid	0	0	0	1	0	0	pyrolysis gas, liquid	0	0	0	1	0	0
Rh-Complex, liquid	0	0	0	1	0	0	Rh-Complex, liquid	0	0	0	1	0	0	Rh-Complex, liquid	0	0	0	1	0	0	Rh-Complex, liquid	0	0	0	1	0	0	Rh-Complex, liquid	0	0	0	1	0	0
silver, liquid	0	0	0	1	0	0	silver, liquid	0	0	0	1	0	0	silver, liquid	0	0	0	1	0	0	silver, liquid	0	0	0	1	0	0	silver, liquid	0	0	0	1	0	0
sodium acetate, liquid	0	0	0	1	0	0	sodium acetate, liquid	0	0	0	1	0	0	sodium acetate, liquid	0	0	0	1	0	0	sodium acetate, liquid	0	0	0	1	0	0	sodium acetate, liquid	0	0	0	1	0	0
Sodium chlorate, liquid	0	0	0	1	0	0	Sodium chlorate, liquid	0	0	0	1	0	0	Sodium chlorate, liquid	0	0	0	1	0	0	Sodium chlorate, liquid	0	0	0	1	0	0	Sodium chlorate, liquid	0	0	0	1	0	0
Sodium chloride, liquid	0	0	0	1	0	0	Sodium chloride, liquid	0	0	0	1	0	0	Sodium chloride, liquid	0	0	0	1	0	0	Sodium chloride, liquid	0	0	0	1	0	0	Sodium chloride, liquid	0	0	0	1	0	0
sodium glycolate, liquid	0	0	0	1	0	0	sodium glycolate, liquid	0	0	0	1	0	0	sodium glycolate, liquid	0	0	0	1	0	0	sodium glycolate, liquid	0	0	0	1	0	0	sodium glycolate, liquid	0	0	0	1	0	0
Sodium hydroxide, liquid	0	0	0	1	0	0	Sodium hydroxide, liquid	0	0	0	1	0	0	Sodium hydroxide, liquid	0	0	0	1	0	0	Sodium hydroxide, liquid	0	0	0	1	0	0	Sodium hydroxide, liquid	0	0	0	1	0	0
Sodium hypochlorite, liquid	0	0	0	1	0	0	Sodium hypochlorite, liquid	0	0	0	1	0	0	Sodium hypochlorite, liquid	0	0	0	1	0	0	Sodium hypochlorite, liquid	0	0	0	1	0	0	Sodium hypochlorite, liquid	0	0	0	1	0	0
sodium ion, liquid	0	0	0	1	0	0	sodium ion, liquid	0	0	0	1	0	0	sodium ion, liquid	0	0	0	1	0	0	sodium ion, liquid	0	0	0	1	0	0	sodium ion, liquid	0	0	0	1	0	0
Sodium sulfate, liquid	0	0	0	1	0	0	Sodium sulfate, liquid	0	0	0	1	0	0	Sodium sulfate, liquid	0	0	0	1	0	0	Sodium sulfate, liquid	0	0	0	1	0	0	Sodium sulfate, liquid	0	0	0	1	0	0
Solids, inorganic, liquid	0	0	0	1	0	0	Solids, inorganic, liquid	0	0	0	1	0	0	Solids, inorganic, liquid	0	0	0	1	0	0	Solids, inorganic, liquid	0	0	0	1	0	0	Solids, inorganic, liquid	0	0	0	1	0	0
Sulfuric acid, liquid	0	0	0	1	0	0	Sulfuric acid, liquid	0	0	0	1	0	0	Sulfuric acid, liquid	0	0	0	1	0	0	Sulfuric acid, liquid	0	0	0	1	0	0	Sulfuric acid, liquid	0	0	0	1	0	0
TDS, liquid	0	0	0	1	0	0	TDS, liquid	0	0	0	1	0	0	TDS, liquid	0	0	0	1	0	0	TDS, liquid	0	0	0	1	0	0	TDS, liquid	0	0	0	1	0	0
triethyl phosphate, liquid	0	0	0	1	0	0	triethyl phosphate, liquid	0	0	0	1	0	0	triethyl phosphate, liquid	0	0	0	1	0	0	triethyl phosphate, liquid	0	0	0	1	0	0	triethyl phosphate, liquid	0	0	0	1	0	0
Zinc, liquid	0	0	0	1	0	0	Zinc, liquid	0	0	0	1	0	0	Zinc, liquid	0	0	0	1	0	0	Zinc, liquid	0	0	0	1	0	0	Zinc, liquid	0	0	0	1	0	0
ARSENIC(V), solid	0	0	0	1	0	0	ARSENIC(V), solid	0	0	0	1	0	0	ARSENIC(V), solid	0	0	0	1	0	0	ARSENIC(V), solid	0	0	0	1	0	0	ARSENIC(V), solid	0	0	0	1	0	0
Boric acid, solid	0	0	0	1	0	0	Boric acid, solid	0	0	0	1	0	0	Boric acid, solid	0	0	0	1	0	0	Boric acid, solid	0	0	0	1	0	0	Boric acid, solid	0	0	0	1	0	0
Calcium carbonate, solid	0	0	0	1	0	0	Calcium carbonate, solid	0	0	0	1	0	0	Calcium carbonate, solid	0	0	0	1	0	0	Calcium carbonate, solid	0	0	0	1	0	0	Calcium carbonate, solid	0	0	0	1	0	0
calcium monoxide, solid	0	0	0	1	0	0	calcium monoxide, solid	0	0	0	1	0	0	calcium monoxide, solid	0	0	0	1	0	0	calcium monoxide, solid	0	0	0	1	0	0	calcium monoxide, solid	0	0	0	1	0	0
Calcium sulfate, solid	0	0	0	1	0	0	Calcium sulfate, solid	0	0	0	1	0	0	Calcium sulfate, solid	0	0	0	1	0	0	Calcium sulfate, solid	0	0	0	1	0	0	Calcium sulfate, solid	0	0	0	1	0	0
Clay, solid	0	0	0	1	0	0	Clay, solid	0	0	0	1	0	0	Clay, solid	0	0	0	1	0	0	Clay, solid	0	0	0	1	0	0	Clay, solid	0	0	0	1	0	0
hazardous waste, solid	0	0	0	1	0	0	hazardous waste, solid	0	0	0	1	0	0	hazardous waste, solid	0	0	0	1	0	0	hazardous waste, solid	0	0	0	1	0	0	hazardous waste, solid	0	0	0	1	0	0
Hydrogen fluoride, solid	0	0	0	1	0	0	Hydrogen fluoride, solid	0	0	0	1	0	0	Hydrogen fluoride, solid	0	0	0	1	0	0	Hydrogen fluoride, solid	0	0	0	1	0	0	Hydrogen fluoride, solid	0	0	0	1	0	0
Impurities, solid	0	0	0	1	0	0	Impurities, solid	0	0	0	1	0	0	Impurities, solid	0	0	0	1	0	0	Impurities, solid	0	0	0	1	0	0	Impurities, solid	0	0	0	1	0	0
lead, solid	0	0	0	1	0	0	lead, solid	0	0	0	1	0	0	lead, solid	0	0	0	1	0	0	lead, solid	0	0	0	1	0	0	lead, solid	0	0	0	1	0	0
Magnesium hydroxide, solid	0	0	0	1	0	0	Magnesium hydroxide, solid	0	0	0	1	0	0	Magnesium hydroxide, solid	0	0	0	1	0	0	Magnesium hydroxide, solid	0	0	0	1	0	0	Magnesium hydroxide, solid	0	0	0	1	0	0
Mercury, solid	0	0	0	1	0	0	Mercury, solid	0	0	0	1	0	0	Mercury, solid	0	0	0	1	0	0	Mercury, solid	0	0	0	1	0	0	Mercury, solid	0	0	0	1	0	0
Mud, solid	0	0	0	1	0	0	Mud, solid	0	0	0	1	0	0	Mud, solid	0	0	0	1	0	0	Mud, solid	0	0	0	1	0	0	Mud, solid	0	0	0	1	0	0
Mud (salt process), solid	0	0	0	1	0	0	Mud (salt process), solid	0	0	0	1	0	0	Mud (salt process), solid	0	0	0	1	0	0	Mud (salt process), solid	0	0	0	1	0	0	Mud (salt process), solid	0	0	0	1	0	0
phosphate ore, in ground, solid	0	0	0	1	0	0	phosphate ore, in ground, solid	0	0	0	1	0	0	phosphate ore, in ground, solid	0	0	0	1	0	0	phosphate ore, in ground, solid	0	0	0	1	0	0	phosphate ore, in ground, solid	0	0	0	1	0	0
Phosphate rock (pure), solid	0	0	0	1	0	0	Phosphate rock (pure), solid	0	0	0	1	0	0	Phosphate rock (pure), solid	0	0	0	1	0	0	Phosphate rock (pure), solid	0	0	0	1	0	0	Phosphate rock (pure), solid	0	0	0	1	0	0
Phosphogypsum, solid	0	0	0	1	0	0	Phosphogypsum, solid	0	0	0	1	0	0	Phosphogypsum, solid	0	0	0	1	0	0	Phosphogypsum, solid	0	0	0	1	0	0	Phosphogypsum, solid	0	0	0	1	0	0
Phosphoric acid, solid	0	0	0	1	0	0	Phosphoric acid, solid	0	0	0	1	0	0	Phosphoric acid, solid	0	0	0	1	0	0	Phosphoric acid, solid	0	0	0	1	0	0	Phosphoric acid, solid	0	0	0	1	0	0
Potassium chloride, solid	0	0	0	1	0	0	Potassium chloride, solid	0	0	0	1	0	0	Potassium chloride, solid	0	0	0	1	0	0	Potassium chloride, solid	0	0	0	1	0	0	Potassium chloride, solid	0	0	0	1	0	0
Silica, solid	0	0	0	1	0	0	Silica, solid	0	0	0	1	0	0	Silica, solid	0	0	0	1	0	0	Silica, solid	0	0	0	1	0	0	Silica, solid	0	0	0	1	0	0
Sodium chloride, solid	0	0	0	1	0	0	Sodium chloride, solid	0	0	0	1	0	0	Sodium chloride, solid	0	0	0	1	0	0	Sodium chloride, solid	0	0	0	1	0	0	Sodium chloride, solid	0	0	0	1	0	0
Sodium Chloroacetate, solid	0	0	0	1	0	0	Sodium Chloroacetate, solid	0	0	0	1	0	0	Sodium Chloroacetate, solid	0	0	0	1	0	0	Sodium Chloroacetate, solid	0	0	0	1	0	0	Sodium Chloroacetate, solid	0	0	0	1	0	0
Solid waste, solid	0	0	0	1	0	0	Solid waste, solid	0	0	0	1	0	0	Solid waste, solid	0	0	0	1	0	0	Solid waste, solid	0	0	0	1	0	0	Solid waste, solid	0	0	0	1	0	0
starch suppressant, solid	0	0	0	1	0	0	starch suppressant, solid	0	0	0	1	0	0	starch suppressant, solid	0	0	0	1	0	0	starch suppressant, solid	0	0	0	1	0	0	starch suppressant, solid	0	0	0	1	0	0
Sulfuric acid, solid	0	0	0	1	0	0	Sulfuric acid, solid	0	0	0	1	0	0	Sulfuric acid, solid	0	0	0	1	0	0	Sulfuric acid, solid	0	0	0	1	0	0	Sulfuric acid, solid	0	0	0	1	0	0
suspended matter (unspecified), solid	0	0	0	1	0	0	suspended matter (unspecified), solid	0	0	0	1	0	0	suspended matter (unspecified), solid	0	0	0	1	0	0	suspended matter (unspecified), solid	0	0	0	1	0	0	suspended matter (unspecified), solid	0	0	0	1	0	0
thallium, solid	0	0	0	1	0	0	thallium, solid	0	0	0	1	0	0	thallium, solid	0	0	0	1	0	0	thallium, solid	0	0	0	1	0	0	thallium, solid	0	0	0	1	0	0
tincal (borax), solid	0	0	0	1	0	0	tincal (borax), solid	0	0	0	1	0	0	tincal (borax), solid	0	0	0	1	0	0	tincal (borax), solid	0	0	0	1	0	0	tincal (borax), solid	0	0	0	1	0	0
Vanadium, solid	0	0	0	1	0	0	Vanadium, solid	0	0	0	1	0	0	Vanadium, solid	0	0	0	1	0	0	Vanadium, solid	0	0	0	1	0	0	Vanadium, solid	0	0	0	1	0	0
Total raw materials, raw material	0	0	0	1	0	0	Total raw materials, raw material	0	0	0	1	0	0	Total raw materials, raw material	0	0	0	1	0	0	Total raw materials, raw material	0	0	0	1	0	0	Total raw materials, raw material	0	0	0	1	0	0
0	0	0	0	1	0	0	0	0	0	0	1	0	0	0	0	0	0	1	0	0	0	0	0	0	1	0	0	0	0	0	0	1	0	0
0	0	0	0	1	0	0	0	0	0	0	1	0	0	0	0	0	0	1	0	0	0	0	0	0	1	0	0	0	0	0	0	1	0	0
0	0	0	0	1	0	0	0	0	0	0	1	0	0	0	0	0	0	1	0	0	0	0	0	0	1	0	0	0	0	0	0	1	0	0
0	0	0	0	1	0	0	0	0	0	0	1	0	0	0	0	0	0	1	0	0	0	0	0	0	1	0	0	0	0	0	0	1	0	0
0	0	0	0	1	0	0	0	0	0	0	1	0	0	0	0	0	0	1	0	0	0	0	0	0	1	0	0	0	0	0	0	1	0	0
0	0	0	0	1	0	0	0	0	0	0	1	0	0	0	0	0	0	1	0	0	0	0	0	0	1	0	0	0	0	0	0	1	0	0
name, air	0	0	0	1	0	0	name, air	0	0	0	1	0	0	name, air	0	0	0	1	0	0	name, air	0	0	0	1	0	0	name, air	0	0	0	1	0	0
Total Air emissions, air	0	0	0	1	0	0	Total Air emissions, air	0	0	0	1	0	0	Total Air emissions, air	0	0	0	1	0	0	Total Air emissions, air	0	0	0	1	0	0	Total Air emissions, air	0	0	0	1	0	0
0	0	0	0	1	0	0	0	0	0	0	1	0	0	0	0	0	0	1	0	0	0	0	0	0	1	0	0	0	0	0	0	1	0	0
0	0	0	0	1	0	0	0	0	0	0	1	0	0	0	0	0	0	1	0	0	0	0	0	0	1	0	0	0	0	0	0	1	0	0
name, liquid	0	0	0	1	0	0	name, liquid	0	0	0	1	0	0	name, liquid	0	0	0	1	0	0	name, liquid	0	0	0	1	0	0	name, liquid	0	0	0	1	0	0
Total Water emissions, liquid	0	0	0	1	0	0	Total Water emissions, liquid	0	0	0	1	0	0	Total Water emissions, liquid	0	0	0	1	0	0	Total Water emissions, liquid	0	0	0	1	0	0	Total Water emissions, liquid	0	0	0	1	0	0
0	0	0	0	1	0	0	0	0	0	0	1	0	0	0	0	0	0	1	0	0	0	0	0	0	1	0	0	0	0	0	0	1	0	0
0	0	0	0	1	0	0	0	0	0	0	1	0	0	0	0	0	0	1	0	0	0	0	0	0	1	0	0	0	0	0	0	1	0	0
solid	0	0	0	1	0	0	solid	0	0	0	1	0	0	solid	0	0	0	1	0	0	solid	0	0	0	1	0	0	solid	0	0	0	1	0	0
Total Solid emissions, solid	0	0	0	1	0	0	Total Solid emissions, solid	0	0	0	1	0	0	Total Solid emissions, solid	0	0	0	1	0	0	Total Solid emissions, solid	0	0	0	1	0	0	Total Solid emissions, solid	0	0	0	1	0	0

## Sheet: Copovidon CT
Cradle to gate chemical tree for copovidon (Copovidone)
Key	Natural resources	Unallocated	Allocated
Level 1	Level 2	Level 3	Level 4	Level 5	Level 6	Level 7	Level 8	Level 9	Level 10	Level 11
Copovidone	glycerol	crude glycerol
1000	52.5655	70.8993
	isopropanol	Propylene	Naphtha	blue water
	75.7798	69.7174	71.0824	199.315
				oil (in ground)
				72.0064
		Sulfuric acid	Sulfur trioxide	oxygen from air	Air (untreated)
		27.2049	22.0855	13.7169	13.7169
				Sulfur	oil (in ground)
				9.52391	9.80963
				Water for rxn	Water (untreated)
				0.831592	0.831592
			Water for rxn	Water (untreated)
			5.52386	5.52386
		Water for rxn	Water (untreated)
		23.6433	23.6433
	NVP	2-pyrrolidone	Ammonia	Natural gas	blue water
	628.943	559.699	159.978	32.9654	10.6671
					Natural gas (unprocessed)
					33.6247
				nitrogen from air	Air (untreated)
				61.5277	61.5278
				oxygen from air	Air (untreated)
				27.313	27.3131
				Water for rxn	Water (untreated)
				42.6583	42.6583
			Butyric acid lactone	1,4-butanediol	1,4-Butynediol	Acetylene	Natural gas	blue water
			608.279	648.541	655.536	218.075	398.399	128.916
								Natural gas (unprocessed)
								406.367
							Oxygen	Air (untreated)
							1071.84	1072.75
						formaldehyde	Ammonium Hydroxide	Ammonia	Natural gas	blue water
						533.509	11.5292	5.60556	1.15509	0.37377
										Natural gas (unprocessed)
										1.17819
									nitrogen from air	Air (untreated)
									2.1559	2.15591
									oxygen from air	Air (untreated)
									0.957036	0.957038
									Water for rxn	Water (untreated)
									1.49473	1.49473
								Water for rxn	Water (untreated)
								5.92361	5.92361
							methanol	Natural gas	blue water
							613.228	315.458	102.077
									Natural gas (unprocessed)
									321.767
								oxygen from air	Air (untreated)
								315.139	315.139
								Water for rxn	Water (untreated)
								562.782	562.782
							oxygen from air	Air (untreated)
							360.367	360.367
							Water for rxn	Water (untreated)
							565.988	565.988
					Hydrogen	hydrogen from SMR natural gas	Methane	Natural gas	blue water
					31.4898	31.4898	65.9318	66.7166	21.5885
									Natural gas (unprocessed)
									68.0509
							oxygen from air	Air (untreated)
							11.6848	11.6849
							Water for rxn	Water (untreated)
							143.644	143.644
			Water for rxn	Water (untreated)
			329.371	329.371
		Acetylene	Natural gas	blue water
		159.578	291.531	94.335
				Natural gas (unprocessed)
				297.362
			Oxygen	Air (untreated)
			784.324	784.993
		Potassium Hydroxide	Potassium chloride	Sylvinite ore	sylvinite ore (in ground)
		28.9775	24.567	72.0371	72.0371
			Water for rxn	Water (untreated)
			5.63134	5.63134
	vinyl acetate	acetic acid	Carbon monoxide	Carbon dioxide	Natural gas	blue water
	405.987	297.884	156.687	78.2882	16.1322	5.22013
						Natural gas (unprocessed)
						16.4548
					nitrogen from air	Air (untreated)
					30.1097	30.1097
					oxygen from air	Air (untreated)
					13.3661	13.3661
					Water for rxn	Water (untreated)
					20.8756	20.8756
				Natural gas	blue water
				52.8129	17.0895
					Natural gas (unprocessed)
					53.8691
				Water for rxn	Water (untreated)
				31.9657	31.9657
			methanol	Natural gas	blue water
			163.538	84.1277	27.2224
					Natural gas (unprocessed)
					85.8102
				oxygen from air	Air (untreated)
				84.0427	84.0428
				Water for rxn	Water (untreated)
				150.085	150.085
		Ethylene	Naphtha	blue water
		143.985	146.804	411.638
				oil (in ground)
				148.712
		Oxygen	Air (untreated)
		94.1053	94.1854

## Sheet: Copovidon CC
Material:	Copovidone
Date:	3Mar2025
GWP 100, kg CO2							Acidification, kg SO2							Eutrophication, kg N							OzoneDepletion, kg CFC-11							Smog, kg O3
Chemicals	Total impact	Energy impact	Process impact	Cumulative impact	Process / Total this chemical	Process / Total this category	Chemicals	Total impact	Energy impact	Process impact	Cumulative impact	Process / Total this chemical	Process / Total this category	Chemicals	Total impact	Energy impact	Process impact	Cumulative impact	Process / Total this chemical	Process / Total this category	Chemicals	Total impact	Energy impact	Process impact	Cumulative impact	Process / Total this chemical	Process / Total this category	Chemicals	Total impact	Energy impact	Process impact	Cumulative impact	Process / Total this chemical	Process / Total this category
Total	7252.94	5769.35	1483.59			0.20455	Total	46.8976	38.9261	7.97158			0.169978	Total	5.38006	0.529617	4.85044			0.901559	Total	3.88326e-05	3.88326e-05	0			0	Total	730.56	255.743	474.816			0.649935
Carbon dioxide, air	6110.34	5266.15	844.188	0.842465	0.138157	0.116393	sulfur dioxide, air	31.5659	31.5659	0	0.673082	0	0	Ammonia, liquid	4.47155	0.00339386	4.46815	0.831133	0.999241	0.830503	methyl bromide, air	2.83975e-05	2.83975e-05	0	0.73128	0	0	NOx, air	260.589	229.771	30.8187	0.356698	0.118266	0.0421851
Methane, air	1142.99	504.325	638.668	1.00006	0.558768	0.0880565	NOx, air	7.35724	6.48714	0.870109	0.82996	0.118266	0.0185534	NOx, air	0.465503	0.41045	0.055053	0.917657	0.118266	0.0102328	methyl chloride, air	3.82678e-06	3.82678e-06	0	0.829825	0	0	Ethylene, air	96.027	0	96.027	0.488141	1	0.131443
dimethyl ether, air	0.733678	0	0.733678	1.00016	1	0.000101156	Ammonia, air	4.41526	0.0886428	4.32661	0.924107	0.979924	0.0922565	Ammonia, air	0.278537	0.00559204	0.272945	0.969429	0.979924	0.0507327	Methyl chloroform, air	1.97106e-06	1.97106e-06	0	0.880583	0	0	Propylene, air	87.7247	0	87.7247	0.60822	1	0.120079
chlorodifluoromethane, air	0.0697166	0.0697166	0	1.00017	0	0	SOx, air	1.86903	0.0459127	1.82312	0.96396	0.975435	0.0388744	Nitric oxide, air	0.070969	0.0439501	0.0270189	0.98262	0.380715	0.00502205	chlorodifluoromethane, air	1.92587e-06	1.92587e-06	0	0.930177	0	0	vinyl acetate, air	77.0925	0	77.0925	0.713745	1	0.105525
CFC-113, air	0.00429258	0.00429258	0	1.00017	0	0	Nitric oxide, air	1.10727	0.685718	0.421555	0.987571	0.380715	0.00898884	Nitrogen dioxide, air	0.0301877	0.00333501	0.0268527	0.988231	0.889525	0.00499116	carbon tetrachloride, air	1.52363e-06	1.52363e-06	0	0.969413	0	0	formaldehyde, air	76.2996	0.0072527	76.2923	0.818185	0.999905	0.10443
carbon tetrachloride, air	0.00292202	0.00292202	0	1.00017	0	0	Nitrogen dioxide, air	0.477115	0.0527095	0.424405	0.997744	0.889525	0.00904961	Phosphorus emission, liquid	0.0264918	0.0264918	0	0.993155	0	0	CFC-113, air	7.00257e-07	7.00257e-07	0	0.987446	0	0	Nitric oxide, air	25.6573	15.8892	9.7681	0.853305	0.380715	0.0133707
methyl chloride, air	0.00248741	0.00248741	0	1.00017	0	0	Sulfur trioxide, air	0.105773	0	0.105773	1	1	0.0022554	nitrogen, atomic, liquid	0.0219119	0.0219119	0	0.997228	0	0	CFC-114, air	2.46525e-07	2.46525e-07	0	0.993794	0	0	acetic acid, air	23.8838	0	23.8838	0.885998	1	0.0326925
CFC-114, air	0.00246525	0.00246525	0	1.00017	0	0	Hydrogen chloride, air	9.64403e-06	0	9.64403e-06	1	1	2.0564e-07	nitrogen, atomic, air	0.0144916	0.0144916	0	0.999922	0	0	CFC-11, air	2.40985e-07	2.40985e-07	0	1	0	0	Naphtha, air	16.609	0	16.609	0.908733	1	0.0227346
Methyl chloroform, air	0.00239813	0.00239813	0	1.00017	0	0	Air (untreated), raw material	0	0	0	1	0	0	COD, liquid	0.00031635	0	0.00031635	0.999981	1	5.88004e-05	Air (untreated), raw material	0	0	0	1	0	0	Nitrogen dioxide, air	11.4817	1.26844	10.2132	0.924449	0.889525	0.01398
CFC-11, air	0.00114468	0.00114468	0	1.00017	0	0	bauxite ore (in ground), raw material	0	0	0	1	0	0	BOD5, liquid	9.57153e-05	0	9.57153e-05	0.999998	1	1.77907e-05	bauxite ore (in ground), raw material	0	0	0	1	0	0	methanol, air	9.8345	0	9.8345	0.93791	1	0.0134616
methyl bromide, air	0.000278407	0.000278407	0	1.00017	0	0	blue water, raw material	0	0	0	1	0	0	BOD, liquid	8.2484e-06	0	8.2484e-06	1	1	1.53314e-06	blue water, raw material	0	0	0	1	0	0	NMVOC, air	8.37519	6.07574	2.29945	0.949374	0.274555	0.00314752
Air (untreated), raw material	0	0	0	1.00017	0	0	coal (in ground), raw material	0	0	0	1	0	0	Air (untreated), raw material	0	0	0	1	0	0	coal (in ground), raw material	0	0	0	1	0	0	isopropanol, air	7.22446	0	7.22446	0.959263	1	0.00988894
bauxite ore (in ground), raw material	0	0	0	1.00017	0	0	crude glycerol, raw material	0	0	0	1	0	0	bauxite ore (in ground), raw material	0	0	0	1	0	0	crude glycerol, raw material	0	0	0	1	0	0	Acetylene, air	6.12264	0	6.12264	0.967644	1	0.00838076
blue water, raw material	0	0	0	1.00017	0	0	Limestone (in ground), raw material	0	0	0	1	0	0	blue water, raw material	0	0	0	1	0	0	Limestone (in ground), raw material	0	0	0	1	0	0	pyrolysis gas, air	5.10195	0	5.10195	0.974628	1	0.00698362
coal (in ground), raw material	0	0	0	1.00017	0	0	Natural gas (unprocessed), raw material	0	0	0	1	0	0	coal (in ground), raw material	0	0	0	1	0	0	Natural gas (unprocessed), raw material	0	0	0	1	0	0	Butyric acid lactone, air	2.8928	0	2.8928	0.978587	1	0.0039597
crude glycerol, raw material	0	0	0	1.00017	0	0	oil (in ground), raw material	0	0	0	1	0	0	crude glycerol, raw material	0	0	0	1	0	0	oil (in ground), raw material	0	0	0	1	0	0	Diisopropyl Ether, air	2.66733	0	2.66733	0.982239	1	0.00365108
Limestone (in ground), raw material	0	0	0	1.00017	0	0	salt rock, in ground, raw material	0	0	0	1	0	0	Limestone (in ground), raw material	0	0	0	1	0	0	salt rock, in ground, raw material	0	0	0	1	0	0	Benzene, air	2.36293	2.3629	3.36674e-05	0.985473	1.42482e-05	4.60844e-08
Natural gas (unprocessed), raw material	0	0	0	1.00017	0	0	sand (in ground), raw material	0	0	0	1	0	0	Natural gas (unprocessed), raw material	0	0	0	1	0	0	sand (in ground), raw material	0	0	0	1	0	0	Carbon monoxide, air	2.31554	-0.00323938	2.31878	0.988642	1.0014	0.00317398
oil (in ground), raw material	0	0	0	1.00017	0	0	sylvinite ore (in ground), raw material	0	0	0	1	0	0	oil (in ground), raw material	0	0	0	1	0	0	sylvinite ore (in ground), raw material	0	0	0	1	0	0	Ethane, air	1.61917	0	1.61917	0.990859	1	0.00221634
salt rock, in ground, raw material	0	0	0	1.00017	0	0	Uranium, raw material	0	0	0	1	0	0	salt rock, in ground, raw material	0	0	0	1	0	0	Uranium, raw material	0	0	0	1	0	0	Propyne, air	1.31777	0	1.31777	0.992663	1	0.00180378
sand (in ground), raw material	0	0	0	1.00017	0	0	Water (untreated), raw material	0	0	0	1	0	0	sand (in ground), raw material	0	0	0	1	0	0	Water (untreated), raw material	0	0	0	1	0	0	Chlorine, air	1.06307	0	1.06307	0.994118	1	0.00145515
sylvinite ore (in ground), raw material	0	0	0	1.00017	0	0	0	0	0	0	1	0	0	sylvinite ore (in ground), raw material	0	0	0	1	0	0	0	0	0	0	1	0	0	Butene, air	0.712779	0	0.712779	0.995093	1	0.000975662
Uranium, raw material	0	0	0	1.00017	0	0	0	0	0	0	1	0	0	Uranium, raw material	0	0	0	1	0	0	0	0	0	0	1	0	0	Methane, air	0.657426	0.290078	0.367349	0.995993	0.558768	0.000502832
Water (untreated), raw material	0	0	0	1.00017	0	0	0	0	0	0	1	0	0	Water (untreated), raw material	0	0	0	1	0	0	0	0	0	0	1	0	0	dimethyl ether, air	0.59191	0	0.59191	0.996804	1	0.000810215
0	0	0	0	1.00017	0	0	0	0	0	0	1	0	0	0	0	0	0	1	0	0	0	0	0	0	1	0	0	Ethylene carbonate, air	0.541657	0	0.541657	0.997545	1	0.000741427
0	0	0	0	1.00017	0	0	0	0	0	0	1	0	0	0	0	0	0	1	0	0	0	0	0	0	1	0	0	1,3-butadiene, air	0.533577	0	0.533577	0.998275	1	0.000730368
0	0	0	0	1.00017	0	0	0	0	0	0	1	0	0	0	0	0	0	1	0	0	0	0	0	0	1	0	0	n-butanol, air	0.374692	0	0.374692	0.998788	1	0.000512884
0	0	0	0	1.00017	0	0	0	0	0	0	1	0	0	0	0	0	0	1	0	0	0	0	0	0	1	0	0	n-Propanol, air	0.324864	0	0.324864	0.999233	1	0.000444678
0	0	0	0	1.00017	0	0	0	0	0	0	1	0	0	0	0	0	0	1	0	0	0	0	0	0	1	0	0	Propane, air	0.299961	0	0.299961	0.999643	1	0.000410591
0	0	0	0	1.00017	0	0	0	0	0	0	1	0	0	0	0	0	0	1	0	0	0	0	0	0	1	0	0	methyl acetate, air	0.0972954	0	0.0972954	0.999777	1	0.000133179
0	0	0	0	1.00017	0	0	0	0	0	0	1	0	0	0	0	0	0	1	0	0	0	0	0	0	1	0	0	isoprene, air	0.0824786	0.0824786	0	0.99989	0	0
0	0	0	0	1.00017	0	0	0	0	0	0	1	0	0	0	0	0	0	1	0	0	0	0	0	0	1	0	0	Butane, air	0.0321817	0	0.0321817	0.999934	1	4.40508e-05
0	0	0	0	1.00017	0	0	0	0	0	0	1	0	0	0	0	0	0	1	0	0	0	0	0	0	1	0	0	formic acid, air	0.0161616	0	0.0161616	0.999956	1	2.21222e-05
0	0	0	0	1.00017	0	0	0	0	0	0	1	0	0	0	0	0	0	1	0	0	0	0	0	0	1	0	0	High alkanes, air	0.00605016	0	0.00605016	0.999964	1	8.28154e-06
0	0	0	0	1.00017	0	0	0	0	0	0	1	0	0	0	0	0	0	1	0	0	0	0	0	0	1	0	0	heptane, air	0.00582193	0	0.00582193	0.999972	1	7.96914e-06
0	0	0	0	1.00017	0	0	0	0	0	0	1	0	0	0	0	0	0	1	0	0	0	0	0	0	1	0	0	n-hexane, air	0.00575233	0	0.00575233	0.99998	1	7.87386e-06
0	0	0	0	1.00017	0	0	0	0	0	0	1	0	0	0	0	0	0	1	0	0	0	0	0	0	1	0	0	n-Pentane, air	0.00563299	0	0.00563299	0.999988	1	7.71051e-06
0	0	0	0	1.00017	0	0	0	0	0	0	1	0	0	0	0	0	0	1	0	0	0	0	0	0	1	0	0	Octane, air	0.00365335	0	0.00365335	0.999993	1	5.00075e-06
0	0	0	0	1.00017	0	0	1,3-butadiene, air	0	0	0	1	0	0	0	0	0	0	1	0	0	1,3-butadiene, air	0	0	0	1	0	0	ethanol, air	0.00318013	0	0.00318013	0.999997	1	4.35301e-06
0	0	0	0	1.00017	0	0	Acetaldehyde, air	0	0	0	1	0	0	0	0	0	0	1	0	0	Acetaldehyde, air	0	0	0	1	0	0	Acetaldehyde, air	0.00200682	0	0.00200682	1	1	2.74696e-06
0	0	0	0	1.00017	0	0	acetic acid, air	0	0	0	1	0	0	0	0	0	0	1	0	0	acetic acid, air	0	0	0	1	0	0	Isobutane, air	0.000229831	0	0.000229831	1	1	3.14596e-07
1,3-butadiene, air	0	0	0	1.00017	0	0	Acetylene, air	0	0	0	1	0	0	1,3-butadiene, air	0	0	0	1	0	0	Acetylene, air	0	0	0	1	0	0	methyl chloride, air	7.33225e-06	7.33225e-06	0	1	0	0
Acetaldehyde, air	0	0	0	1.00017	0	0	Ammonium Hydroxide, air	0	0	0	1	0	0	Acetaldehyde, air	0	0	0	1	0	0	Ammonia, air	0	0	0	1	0	0	methyl bromide, air	1.04211e-06	1.04211e-06	0	1	0	0
acetic acid, air	0	0	0	1.00017	0	0	Argon, air	0	0	0	1	0	0	acetic acid, air	0	0	0	1	0	0	Ammonium Hydroxide, air	0	0	0	1	0	0	Methyl chloroform, air	8.01524e-08	8.01524e-08	0	1	0	0
Acetylene, air	0	0	0	1.00017	0	0	Arsenic, air	0	0	0	1	0	0	Acetylene, air	0	0	0	1	0	0	Argon, air	0	0	0	1	0	0	Air (untreated), raw material	0	0	0	1	0	0
Ammonia, air	0	0	0	1.00017	0	0	Benzene, air	0	0	0	1	0	0	Ammonium Hydroxide, air	0	0	0	1	0	0	Arsenic, air	0	0	0	1	0	0	bauxite ore (in ground), raw material	0	0	0	1	0	0
Ammonium Hydroxide, air	0	0	0	1.00017	0	0	beryllium, air	0	0	0	1	0	0	Argon, air	0	0	0	1	0	0	Benzene, air	0	0	0	1	0	0	blue water, raw material	0	0	0	1	0	0
Argon, air	0	0	0	1.00017	0	0	Butane, air	0	0	0	1	0	0	Arsenic, air	0	0	0	1	0	0	beryllium, air	0	0	0	1	0	0	coal (in ground), raw material	0	0	0	1	0	0
Arsenic, air	0	0	0	1.00017	0	0	Butene, air	0	0	0	1	0	0	Benzene, air	0	0	0	1	0	0	Butane, air	0	0	0	1	0	0	crude glycerol, raw material	0	0	0	1	0	0
Benzene, air	0	0	0	1.00017	0	0	Butyric acid lactone, air	0	0	0	1	0	0	beryllium, air	0	0	0	1	0	0	Butene, air	0	0	0	1	0	0	Limestone (in ground), raw material	0	0	0	1	0	0
beryllium, air	0	0	0	1.00017	0	0	cadmium, air	0	0	0	1	0	0	Butane, air	0	0	0	1	0	0	Butyric acid lactone, air	0	0	0	1	0	0	Natural gas (unprocessed), raw material	0	0	0	1	0	0
Butane, air	0	0	0	1.00017	0	0	Carbon dioxide, air	0	0	0	1	0	0	Butene, air	0	0	0	1	0	0	cadmium, air	0	0	0	1	0	0	oil (in ground), raw material	0	0	0	1	0	0
Butene, air	0	0	0	1.00017	0	0	Carbon monoxide, air	0	0	0	1	0	0	Butyric acid lactone, air	0	0	0	1	0	0	Carbon dioxide, air	0	0	0	1	0	0	salt rock, in ground, raw material	0	0	0	1	0	0
Butyric acid lactone, air	0	0	0	1.00017	0	0	carbon tetrachloride, air	0	0	0	1	0	0	cadmium, air	0	0	0	1	0	0	Carbon monoxide, air	0	0	0	1	0	0	sand (in ground), raw material	0	0	0	1	0	0
cadmium, air	0	0	0	1.00017	0	0	carbon tetrafluoride, air	0	0	0	1	0	0	Carbon dioxide, air	0	0	0	1	0	0	carbon tetrafluoride, air	0	0	0	1	0	0	sylvinite ore (in ground), raw material	0	0	0	1	0	0
Carbon monoxide, air	0	0	0	1.00017	0	0	CFC-11, air	0	0	0	1	0	0	Carbon monoxide, air	0	0	0	1	0	0	Chlorine, air	0	0	0	1	0	0	Uranium, raw material	0	0	0	1	0	0
carbon tetrafluoride, air	0	0	0	1.00017	0	0	CFC-113, air	0	0	0	1	0	0	carbon tetrachloride, air	0	0	0	1	0	0	chromium, air	0	0	0	1	0	0	Water (untreated), raw material	0	0	0	1	0	0
Chlorine, air	0	0	0	1.00017	0	0	CFC-114, air	0	0	0	1	0	0	carbon tetrafluoride, air	0	0	0	1	0	0	chromium VI, air	0	0	0	1	0	0	0	0	0	0	1	0	0
chromium, air	0	0	0	1.00017	0	0	Chlorine, air	0	0	0	1	0	0	CFC-11, air	0	0	0	1	0	0	Diisopropyl Ether, air	0	0	0	1	0	0	0	0	0	0	1	0	0
chromium VI, air	0	0	0	1.00017	0	0	chlorodifluoromethane, air	0	0	0	1	0	0	CFC-113, air	0	0	0	1	0	0	dimethyl ether, air	0	0	0	1	0	0	0	0	0	0	1	0	0
Diisopropyl Ether, air	0	0	0	1.00017	0	0	chromium, air	0	0	0	1	0	0	CFC-114, air	0	0	0	1	0	0	Ethane, air	0	0	0	1	0	0	0	0	0	0	1	0	0
Ethane, air	0	0	0	1.00017	0	0	chromium VI, air	0	0	0	1	0	0	Chlorine, air	0	0	0	1	0	0	ethanol, air	0	0	0	1	0	0	0	0	0	0	1	0	0
ethanol, air	0	0	0	1.00017	0	0	Diisopropyl Ether, air	0	0	0	1	0	0	chlorodifluoromethane, air	0	0	0	1	0	0	Ethylene, air	0	0	0	1	0	0	0	0	0	0	1	0	0
Ethylene, air	0	0	0	1.00017	0	0	dimethyl ether, air	0	0	0	1	0	0	chromium, air	0	0	0	1	0	0	Ethylene carbonate, air	0	0	0	1	0	0	0	0	0	0	1	0	0
Ethylene carbonate, air	0	0	0	1.00017	0	0	Ethane, air	0	0	0	1	0	0	chromium VI, air	0	0	0	1	0	0	formaldehyde, air	0	0	0	1	0	0	0	0	0	0	1	0	0
formaldehyde, air	0	0	0	1.00017	0	0	ethanol, air	0	0	0	1	0	0	Diisopropyl Ether, air	0	0	0	1	0	0	formic acid, air	0	0	0	1	0	0	0	0	0	0	1	0	0
formic acid, air	0	0	0	1.00017	0	0	Ethylene, air	0	0	0	1	0	0	dimethyl ether, air	0	0	0	1	0	0	heptane, air	0	0	0	1	0	0	0	0	0	0	1	0	0
heptane, air	0	0	0	1.00017	0	0	Ethylene carbonate, air	0	0	0	1	0	0	Ethane, air	0	0	0	1	0	0	HFC-152a, air	0	0	0	1	0	0	0	0	0	0	1	0	0
HFC-152a, air	0	0	0	1.00017	0	0	formaldehyde, air	0	0	0	1	0	0	ethanol, air	0	0	0	1	0	0	High alkanes, air	0	0	0	1	0	0	0	0	0	0	1	0	0
High alkanes, air	0	0	0	1.00017	0	0	formic acid, air	0	0	0	1	0	0	Ethylene, air	0	0	0	1	0	0	Hydrogen, air	0	0	0	1	0	0	0	0	0	0	1	0	0
Hydrogen, air	0	0	0	1.00017	0	0	heptane, air	0	0	0	1	0	0	Ethylene carbonate, air	0	0	0	1	0	0	Hydrogen chloride, air	0	0	0	1	0	0	0	0	0	0	1	0	0
Hydrogen chloride, air	0	0	0	1.00017	0	0	HFC-152a, air	0	0	0	1	0	0	formaldehyde, air	0	0	0	1	0	0	Isobutane, air	0	0	0	1	0	0	0	0	0	0	1	0	0
Isobutane, air	0	0	0	1.00017	0	0	High alkanes, air	0	0	0	1	0	0	formic acid, air	0	0	0	1	0	0	isoprene, air	0	0	0	1	0	0	0	0	0	0	1	0	0
isoprene, air	0	0	0	1.00017	0	0	Hydrogen, air	0	0	0	1	0	0	heptane, air	0	0	0	1	0	0	isopropanol, air	0	0	0	1	0	0	0	0	0	0	1	0	0
isopropanol, air	0	0	0	1.00017	0	0	Isobutane, air	0	0	0	1	0	0	HFC-152a, air	0	0	0	1	0	0	lead, air	0	0	0	1	0	0	Ammonia, air	0	0	0	1	0	0
lead, air	0	0	0	1.00017	0	0	isoprene, air	0	0	0	1	0	0	High alkanes, air	0	0	0	1	0	0	Mercury, air	0	0	0	1	0	0	Ammonium Hydroxide, air	0	0	0	1	0	0
Mercury, air	0	0	0	1.00017	0	0	isopropanol, air	0	0	0	1	0	0	Hydrogen, air	0	0	0	1	0	0	metals (unspecified), air	0	0	0	1	0	0	Argon, air	0	0	0	1	0	0
metals (unspecified), air	0	0	0	1.00017	0	0	lead, air	0	0	0	1	0	0	Hydrogen chloride, air	0	0	0	1	0	0	Methane, air	0	0	0	1	0	0	Arsenic, air	0	0	0	1	0	0
methanol, air	0	0	0	1.00017	0	0	Mercury, air	0	0	0	1	0	0	Isobutane, air	0	0	0	1	0	0	methanol, air	0	0	0	1	0	0	beryllium, air	0	0	0	1	0	0
methyl acetate, air	0	0	0	1.00017	0	0	metals (unspecified), air	0	0	0	1	0	0	isoprene, air	0	0	0	1	0	0	methyl acetate, air	0	0	0	1	0	0	cadmium, air	0	0	0	1	0	0
Naphtha, air	0	0	0	1.00017	0	0	Methane, air	0	0	0	1	0	0	isopropanol, air	0	0	0	1	0	0	Naphtha, air	0	0	0	1	0	0	Carbon dioxide, air	0	0	0	1	0	0
n-butanol, air	0	0	0	1.00017	0	0	methanol, air	0	0	0	1	0	0	lead, air	0	0	0	1	0	0	n-butanol, air	0	0	0	1	0	0	carbon tetrachloride, air	0	0	0	1	0	0
n-hexane, air	0	0	0	1.00017	0	0	methyl acetate, air	0	0	0	1	0	0	Mercury, air	0	0	0	1	0	0	n-hexane, air	0	0	0	1	0	0	carbon tetrafluoride, air	0	0	0	1	0	0
nickel, air	0	0	0	1.00017	0	0	methyl bromide, air	0	0	0	1	0	0	metals (unspecified), air	0	0	0	1	0	0	nickel, air	0	0	0	1	0	0	CFC-11, air	0	0	0	1	0	0
Nitric oxide, air	0	0	0	1.00017	0	0	methyl chloride, air	0	0	0	1	0	0	Methane, air	0	0	0	1	0	0	Nitric oxide, air	0	0	0	1	0	0	CFC-113, air	0	0	0	1	0	0
Nitrogen dioxide, air	0	0	0	1.00017	0	0	Methyl chloroform, air	0	0	0	1	0	0	methanol, air	0	0	0	1	0	0	Nitrogen dioxide, air	0	0	0	1	0	0	CFC-114, air	0	0	0	1	0	0
nitrogen, atomic, air	0	0	0	1.00017	0	0	Naphtha, air	0	0	0	1	0	0	methyl acetate, air	0	0	0	1	0	0	nitrogen, atomic, air	0	0	0	1	0	0	chlorodifluoromethane, air	0	0	0	1	0	0
NMVOC, air	0	0	0	1.00017	0	0	n-butanol, air	0	0	0	1	0	0	methyl bromide, air	0	0	0	1	0	0	Nitrous oxide, air	0	0	0	1	0	0	chromium, air	0	0	0	1	0	0
NOx, air	0	0	0	1.00017	0	0	n-hexane, air	0	0	0	1	0	0	methyl chloride, air	0	0	0	1	0	0	NMVOC, air	0	0	0	1	0	0	chromium VI, air	0	0	0	1	0	0
n-Pentane, air	0	0	0	1.00017	0	0	nickel, air	0	0	0	1	0	0	Methyl chloroform, air	0	0	0	1	0	0	NOx, air	0	0	0	1	0	0	HFC-152a, air	0	0	0	1	0	0
n-Propanol, air	0	0	0	1.00017	0	0	nitrogen, atomic, air	0	0	0	1	0	0	Naphtha, air	0	0	0	1	0	0	n-Pentane, air	0	0	0	1	0	0	Hydrogen, air	0	0	0	1	0	0
NVP, air	0	0	0	1.00017	0	0	Nitrous oxide, air	0	0	0	1	0	0	n-butanol, air	0	0	0	1	0	0	n-Propanol, air	0	0	0	1	0	0	Hydrogen chloride, air	0	0	0	1	0	0
Octane, air	0	0	0	1.00017	0	0	NMVOC, air	0	0	0	1	0	0	n-hexane, air	0	0	0	1	0	0	NVP, air	0	0	0	1	0	0	lead, air	0	0	0	1	0	0
organic matter (unspecified), air	0	0	0	1.00017	0	0	n-Pentane, air	0	0	0	1	0	0	nickel, air	0	0	0	1	0	0	Octane, air	0	0	0	1	0	0	Mercury, air	0	0	0	1	0	0
Particulate matter, air	0	0	0	1.00017	0	0	n-Propanol, air	0	0	0	1	0	0	Nitrous oxide, air	0	0	0	1	0	0	organic matter (unspecified), air	0	0	0	1	0	0	metals (unspecified), air	0	0	0	1	0	0
particulate matter 2.5, air	0	0	0	1.00017	0	0	NVP, air	0	0	0	1	0	0	NMVOC, air	0	0	0	1	0	0	Particulate matter, air	0	0	0	1	0	0	nickel, air	0	0	0	1	0	0
perfluoroethane, air	0	0	0	1.00017	0	0	Octane, air	0	0	0	1	0	0	n-Pentane, air	0	0	0	1	0	0	particulate matter 2.5, air	0	0	0	1	0	0	nitrogen, atomic, air	0	0	0	1	0	0
PM10, air	0	0	0	1.00017	0	0	organic matter (unspecified), air	0	0	0	1	0	0	n-Propanol, air	0	0	0	1	0	0	perfluoroethane, air	0	0	0	1	0	0	Nitrous oxide, air	0	0	0	1	0	0
Propane, air	0	0	0	1.00017	0	0	Particulate matter, air	0	0	0	1	0	0	NVP, air	0	0	0	1	0	0	PM10, air	0	0	0	1	0	0	NVP, air	0	0	0	1	0	0
propargyl alcohol, air	0	0	0	1.00017	0	0	particulate matter 2.5, air	0	0	0	1	0	0	Octane, air	0	0	0	1	0	0	Propane, air	0	0	0	1	0	0	organic matter (unspecified), air	0	0	0	1	0	0
Propylene, air	0	0	0	1.00017	0	0	perfluoroethane, air	0	0	0	1	0	0	organic matter (unspecified), air	0	0	0	1	0	0	propargyl alcohol, air	0	0	0	1	0	0	Particulate matter, air	0	0	0	1	0	0
Propyne, air	0	0	0	1.00017	0	0	PM10, air	0	0	0	1	0	0	Particulate matter, air	0	0	0	1	0	0	Propylene, air	0	0	0	1	0	0	particulate matter 2.5, air	0	0	0	1	0	0
pyrolysis gas, air	0	0	0	1.00017	0	0	Propane, air	0	0	0	1	0	0	particulate matter 2.5, air	0	0	0	1	0	0	Propyne, air	0	0	0	1	0	0	perfluoroethane, air	0	0	0	1	0	0
silver, air	0	0	0	1.00017	0	0	propargyl alcohol, air	0	0	0	1	0	0	perfluoroethane, air	0	0	0	1	0	0	pyrolysis gas, air	0	0	0	1	0	0	PM10, air	0	0	0	1	0	0
SOx, air	0	0	0	1.00017	0	0	Propylene, air	0	0	0	1	0	0	PM10, air	0	0	0	1	0	0	silver, air	0	0	0	1	0	0	propargyl alcohol, air	0	0	0	1	0	0
Sulfur, air	0	0	0	1.00017	0	0	Propyne, air	0	0	0	1	0	0	Propane, air	0	0	0	1	0	0	SOx, air	0	0	0	1	0	0	silver, air	0	0	0	1	0	0
sulfur dioxide, air	0	0	0	1.00017	0	0	pyrolysis gas, air	0	0	0	1	0	0	propargyl alcohol, air	0	0	0	1	0	0	Sulfur, air	0	0	0	1	0	0	SOx, air	0	0	0	1	0	0
Sulfur hexafluoride, air	0	0	0	1.00017	0	0	silver, air	0	0	0	1	0	0	Propylene, air	0	0	0	1	0	0	sulfur dioxide, air	0	0	0	1	0	0	Sulfur, air	0	0	0	1	0	0
Sulfur trioxide, air	0	0	0	1.00017	0	0	Sulfur, air	0	0	0	1	0	0	Propyne, air	0	0	0	1	0	0	Sulfur hexafluoride, air	0	0	0	1	0	0	sulfur dioxide, air	0	0	0	1	0	0
vinyl acetate, air	0	0	0	1.00017	0	0	Sulfur hexafluoride, air	0	0	0	1	0	0	pyrolysis gas, air	0	0	0	1	0	0	Sulfur trioxide, air	0	0	0	1	0	0	Sulfur hexafluoride, air	0	0	0	1	0	0
VOCs (unspecified), air	0	0	0	1.00017	0	0	vinyl acetate, air	0	0	0	1	0	0	silver, air	0	0	0	1	0	0	vinyl acetate, air	0	0	0	1	0	0	Sulfur trioxide, air	0	0	0	1	0	0
Zinc, air	0	0	0	1.00017	0	0	VOCs (unspecified), air	0	0	0	1	0	0	SOx, air	0	0	0	1	0	0	VOCs (unspecified), air	0	0	0	1	0	0	VOCs (unspecified), air	0	0	0	1	0	0
2-pyrrolidone, liquid	0	0	0	1.00017	0	0	Zinc, air	0	0	0	1	0	0	Sulfur, air	0	0	0	1	0	0	Zinc, air	0	0	0	1	0	0	Zinc, air	0	0	0	1	0	0
Acetaldehyde, liquid	0	0	0	1.00017	0	0	2-pyrrolidone, liquid	0	0	0	1	0	0	sulfur dioxide, air	0	0	0	1	0	0	2-pyrrolidone, liquid	0	0	0	1	0	0	2-pyrrolidone, liquid	0	0	0	1	0	0
acetic acid, liquid	0	0	0	1.00017	0	0	Acetaldehyde, liquid	0	0	0	1	0	0	Sulfur hexafluoride, air	0	0	0	1	0	0	Acetaldehyde, liquid	0	0	0	1	0	0	Acetaldehyde, liquid	0	0	0	1	0	0
activated carbon, liquid	0	0	0	1.00017	0	0	acetic acid, liquid	0	0	0	1	0	0	Sulfur trioxide, air	0	0	0	1	0	0	acetic acid, liquid	0	0	0	1	0	0	acetic acid, liquid	0	0	0	1	0	0
Ammonia, liquid	0	0	0	1.00017	0	0	activated carbon, liquid	0	0	0	1	0	0	vinyl acetate, air	0	0	0	1	0	0	activated carbon, liquid	0	0	0	1	0	0	activated carbon, liquid	0	0	0	1	0	0
Arsenic, liquid	0	0	0	1.00017	0	0	Ammonia, liquid	0	0	0	1	0	0	VOCs (unspecified), air	0	0	0	1	0	0	Ammonia, liquid	0	0	0	1	0	0	Ammonia, liquid	0	0	0	1	0	0
Ash, liquid	0	0	0	1.00017	0	0	Arsenic, liquid	0	0	0	1	0	0	Zinc, air	0	0	0	1	0	0	Arsenic, liquid	0	0	0	1	0	0	Arsenic, liquid	0	0	0	1	0	0
barium, liquid	0	0	0	1.00017	0	0	Ash, liquid	0	0	0	1	0	0	2-pyrrolidone, liquid	0	0	0	1	0	0	Ash, liquid	0	0	0	1	0	0	Ash, liquid	0	0	0	1	0	0
barium carbonate, liquid	0	0	0	1.00017	0	0	barium, liquid	0	0	0	1	0	0	Acetaldehyde, liquid	0	0	0	1	0	0	barium, liquid	0	0	0	1	0	0	barium, liquid	0	0	0	1	0	0
Benzene, liquid	0	0	0	1.00017	0	0	barium carbonate, liquid	0	0	0	1	0	0	acetic acid, liquid	0	0	0	1	0	0	barium carbonate, liquid	0	0	0	1	0	0	barium carbonate, liquid	0	0	0	1	0	0
BOD, liquid	0	0	0	1.00017	0	0	Benzene, liquid	0	0	0	1	0	0	activated carbon, liquid	0	0	0	1	0	0	Benzene, liquid	0	0	0	1	0	0	Benzene, liquid	0	0	0	1	0	0
BOD5, liquid	0	0	0	1.00017	0	0	BOD, liquid	0	0	0	1	0	0	Arsenic, liquid	0	0	0	1	0	0	BOD, liquid	0	0	0	1	0	0	BOD, liquid	0	0	0	1	0	0
Boron, liquid	0	0	0	1.00017	0	0	BOD5, liquid	0	0	0	1	0	0	Ash, liquid	0	0	0	1	0	0	BOD5, liquid	0	0	0	1	0	0	BOD5, liquid	0	0	0	1	0	0
brine impurities, liquid	0	0	0	1.00017	0	0	Boron, liquid	0	0	0	1	0	0	barium, liquid	0	0	0	1	0	0	Boron, liquid	0	0	0	1	0	0	Boron, liquid	0	0	0	1	0	0
Butyric acid lactone, liquid	0	0	0	1.00017	0	0	brine impurities, liquid	0	0	0	1	0	0	barium carbonate, liquid	0	0	0	1	0	0	brine impurities, liquid	0	0	0	1	0	0	brine impurities, liquid	0	0	0	1	0	0
Carbon dioxide, liquid	0	0	0	1.00017	0	0	Butyric acid lactone, liquid	0	0	0	1	0	0	Benzene, liquid	0	0	0	1	0	0	Butyric acid lactone, liquid	0	0	0	1	0	0	Butyric acid lactone, liquid	0	0	0	1	0	0
Carbon monoxide, liquid	0	0	0	1.00017	0	0	Carbon dioxide, liquid	0	0	0	1	0	0	Boron, liquid	0	0	0	1	0	0	Carbon dioxide, liquid	0	0	0	1	0	0	Carbon dioxide, liquid	0	0	0	1	0	0
Chloride, liquid	0	0	0	1.00017	0	0	Carbon monoxide, liquid	0	0	0	1	0	0	brine impurities, liquid	0	0	0	1	0	0	Carbon monoxide, liquid	0	0	0	1	0	0	Carbon monoxide, liquid	0	0	0	1	0	0
chromium, liquid	0	0	0	1.00017	0	0	Chloride, liquid	0	0	0	1	0	0	Butyric acid lactone, liquid	0	0	0	1	0	0	Chloride, liquid	0	0	0	1	0	0	Chloride, liquid	0	0	0	1	0	0
Chromium III, liquid	0	0	0	1.00017	0	0	chromium, liquid	0	0	0	1	0	0	Carbon dioxide, liquid	0	0	0	1	0	0	chromium, liquid	0	0	0	1	0	0	chromium, liquid	0	0	0	1	0	0
Chromium VI, liquid	0	0	0	1.00017	0	0	Chromium III, liquid	0	0	0	1	0	0	Carbon monoxide, liquid	0	0	0	1	0	0	Chromium III, liquid	0	0	0	1	0	0	Chromium III, liquid	0	0	0	1	0	0
COD, liquid	0	0	0	1.00017	0	0	Chromium VI, liquid	0	0	0	1	0	0	Chloride, liquid	0	0	0	1	0	0	Chromium VI, liquid	0	0	0	1	0	0	Chromium VI, liquid	0	0	0	1	0	0
Diisopropyl Ether, liquid	0	0	0	1.00017	0	0	COD, liquid	0	0	0	1	0	0	chromium, liquid	0	0	0	1	0	0	COD, liquid	0	0	0	1	0	0	COD, liquid	0	0	0	1	0	0
dimethyl ether, liquid	0	0	0	1.00017	0	0	Diisopropyl Ether, liquid	0	0	0	1	0	0	Chromium III, liquid	0	0	0	1	0	0	Diisopropyl Ether, liquid	0	0	0	1	0	0	Diisopropyl Ether, liquid	0	0	0	1	0	0
ethanecarboxylic acid, liquid	0	0	0	1.00017	0	0	dimethyl ether, liquid	0	0	0	1	0	0	Chromium VI, liquid	0	0	0	1	0	0	dimethyl ether, liquid	0	0	0	1	0	0	dimethyl ether, liquid	0	0	0	1	0	0
ethanol, liquid	0	0	0	1.00017	0	0	ethanecarboxylic acid, liquid	0	0	0	1	0	0	Diisopropyl Ether, liquid	0	0	0	1	0	0	ethanecarboxylic acid, liquid	0	0	0	1	0	0	ethanecarboxylic acid, liquid	0	0	0	1	0	0
ethyl butanol, liquid	0	0	0	1.00017	0	0	ethanol, liquid	0	0	0	1	0	0	dimethyl ether, liquid	0	0	0	1	0	0	ethanol, liquid	0	0	0	1	0	0	ethanol, liquid	0	0	0	1	0	0
formaldehyde, liquid	0	0	0	1.00017	0	0	ethyl butanol, liquid	0	0	0	1	0	0	ethanecarboxylic acid, liquid	0	0	0	1	0	0	ethyl butanol, liquid	0	0	0	1	0	0	ethyl butanol, liquid	0	0	0	1	0	0
glycerol, liquid	0	0	0	1.00017	0	0	formaldehyde, liquid	0	0	0	1	0	0	ethanol, liquid	0	0	0	1	0	0	formaldehyde, liquid	0	0	0	1	0	0	formaldehyde, liquid	0	0	0	1	0	0
grease / oil, liquid	0	0	0	1.00017	0	0	glycerol, liquid	0	0	0	1	0	0	ethyl butanol, liquid	0	0	0	1	0	0	glycerol, liquid	0	0	0	1	0	0	glycerol, liquid	0	0	0	1	0	0
heavy organics, liquid	0	0	0	1.00017	0	0	grease / oil, liquid	0	0	0	1	0	0	formaldehyde, liquid	0	0	0	1	0	0	grease / oil, liquid	0	0	0	1	0	0	grease / oil, liquid	0	0	0	1	0	0
Heavy waste of pyrrolidone, liquid	0	0	0	1.00017	0	0	heavy organics, liquid	0	0	0	1	0	0	glycerol, liquid	0	0	0	1	0	0	heavy organics, liquid	0	0	0	1	0	0	heavy organics, liquid	0	0	0	1	0	0
Hydrogen, liquid	0	0	0	1.00017	0	0	Heavy waste of pyrrolidone, liquid	0	0	0	1	0	0	grease / oil, liquid	0	0	0	1	0	0	Heavy waste of pyrrolidone, liquid	0	0	0	1	0	0	Heavy waste of pyrrolidone, liquid	0	0	0	1	0	0
Hydrogen chloride, liquid	0	0	0	1.00017	0	0	Hydrogen, liquid	0	0	0	1	0	0	heavy organics, liquid	0	0	0	1	0	0	Hydrogen, liquid	0	0	0	1	0	0	Hydrogen, liquid	0	0	0	1	0	0
isopropanol, liquid	0	0	0	1.00017	0	0	Hydrogen chloride, liquid	0	0	0	1	0	0	Heavy waste of pyrrolidone, liquid	0	0	0	1	0	0	Hydrogen chloride, liquid	0	0	0	1	0	0	Hydrogen chloride, liquid	0	0	0	1	0	0
lead, liquid	0	0	0	1.00017	0	0	isopropanol, liquid	0	0	0	1	0	0	Hydrogen, liquid	0	0	0	1	0	0	isopropanol, liquid	0	0	0	1	0	0	isopropanol, liquid	0	0	0	1	0	0
methanol, liquid	0	0	0	1.00017	0	0	lead, liquid	0	0	0	1	0	0	Hydrogen chloride, liquid	0	0	0	1	0	0	lead, liquid	0	0	0	1	0	0	lead, liquid	0	0	0	1	0	0
methyl acetate, liquid	0	0	0	1.00017	0	0	methanol, liquid	0	0	0	1	0	0	isopropanol, liquid	0	0	0	1	0	0	methanol, liquid	0	0	0	1	0	0	methanol, liquid	0	0	0	1	0	0
Methyl iodide, liquid	0	0	0	1.00017	0	0	methyl acetate, liquid	0	0	0	1	0	0	lead, liquid	0	0	0	1	0	0	methyl acetate, liquid	0	0	0	1	0	0	methyl acetate, liquid	0	0	0	1	0	0
Mobile ions, liquid	0	0	0	1.00017	0	0	Methyl iodide, liquid	0	0	0	1	0	0	methanol, liquid	0	0	0	1	0	0	Methyl iodide, liquid	0	0	0	1	0	0	Methyl iodide, liquid	0	0	0	1	0	0
n-butanol, liquid	0	0	0	1.00017	0	0	Mobile ions, liquid	0	0	0	1	0	0	methyl acetate, liquid	0	0	0	1	0	0	Mobile ions, liquid	0	0	0	1	0	0	Mobile ions, liquid	0	0	0	1	0	0
nickel, liquid	0	0	0	1.00017	0	0	n-butanol, liquid	0	0	0	1	0	0	Methyl iodide, liquid	0	0	0	1	0	0	n-butanol, liquid	0	0	0	1	0	0	n-butanol, liquid	0	0	0	1	0	0
nitrogen, atomic, liquid	0	0	0	1.00017	0	0	nickel, liquid	0	0	0	1	0	0	Mobile ions, liquid	0	0	0	1	0	0	nickel, liquid	0	0	0	1	0	0	nickel, liquid	0	0	0	1	0	0
n-Propanol, liquid	0	0	0	1.00017	0	0	nitrogen, atomic, liquid	0	0	0	1	0	0	n-butanol, liquid	0	0	0	1	0	0	nitrogen, atomic, liquid	0	0	0	1	0	0	nitrogen, atomic, liquid	0	0	0	1	0	0
NVP, liquid	0	0	0	1.00017	0	0	n-Propanol, liquid	0	0	0	1	0	0	nickel, liquid	0	0	0	1	0	0	n-Propanol, liquid	0	0	0	1	0	0	n-Propanol, liquid	0	0	0	1	0	0
organic matter (unspecified), liquid	0	0	0	1.00017	0	0	NVP, liquid	0	0	0	1	0	0	n-Propanol, liquid	0	0	0	1	0	0	NVP, liquid	0	0	0	1	0	0	NVP, liquid	0	0	0	1	0	0
Phosphorus emission, liquid	0	0	0	1.00017	0	0	organic matter (unspecified), liquid	0	0	0	1	0	0	NVP, liquid	0	0	0	1	0	0	organic matter (unspecified), liquid	0	0	0	1	0	0	organic matter (unspecified), liquid	0	0	0	1	0	0
Potassium carbonate, liquid	0	0	0	1.00017	0	0	Phosphorus emission, liquid	0	0	0	1	0	0	organic matter (unspecified), liquid	0	0	0	1	0	0	Phosphorus emission, liquid	0	0	0	1	0	0	Phosphorus emission, liquid	0	0	0	1	0	0
Potassium chloride, liquid	0	0	0	1.00017	0	0	Potassium carbonate, liquid	0	0	0	1	0	0	Potassium carbonate, liquid	0	0	0	1	0	0	Potassium carbonate, liquid	0	0	0	1	0	0	Potassium carbonate, liquid	0	0	0	1	0	0
propargyl alcohol, liquid	0	0	0	1.00017	0	0	Potassium chloride, liquid	0	0	0	1	0	0	Potassium chloride, liquid	0	0	0	1	0	0	Potassium chloride, liquid	0	0	0	1	0	0	Potassium chloride, liquid	0	0	0	1	0	0
pyrolysis gas, liquid	0	0	0	1.00017	0	0	propargyl alcohol, liquid	0	0	0	1	0	0	propargyl alcohol, liquid	0	0	0	1	0	0	propargyl alcohol, liquid	0	0	0	1	0	0	propargyl alcohol, liquid	0	0	0	1	0	0
Rh-Complex, liquid	0	0	0	1.00017	0	0	pyrolysis gas, liquid	0	0	0	1	0	0	pyrolysis gas, liquid	0	0	0	1	0	0	pyrolysis gas, liquid	0	0	0	1	0	0	pyrolysis gas, liquid	0	0	0	1	0	0
silver, liquid	0	0	0	1.00017	0	0	Rh-Complex, liquid	0	0	0	1	0	0	Rh-Complex, liquid	0	0	0	1	0	0	Rh-Complex, liquid	0	0	0	1	0	0	Rh-Complex, liquid	0	0	0	1	0	0
Sodium chloride, liquid	0	0	0	1.00017	0	0	silver, liquid	0	0	0	1	0	0	silver, liquid	0	0	0	1	0	0	silver, liquid	0	0	0	1	0	0	silver, liquid	0	0	0	1	0	0
Sodium hydroxide, liquid	0	0	0	1.00017	0	0	Sodium chloride, liquid	0	0	0	1	0	0	Sodium chloride, liquid	0	0	0	1	0	0	Sodium chloride, liquid	0	0	0	1	0	0	Sodium chloride, liquid	0	0	0	1	0	0
sodium ion, liquid	0	0	0	1.00017	0	0	Sodium hydroxide, liquid	0	0	0	1	0	0	Sodium hydroxide, liquid	0	0	0	1	0	0	Sodium hydroxide, liquid	0	0	0	1	0	0	Sodium hydroxide, liquid	0	0	0	1	0	0
Sulfuric acid, liquid	0	0	0	1.00017	0	0	sodium ion, liquid	0	0	0	1	0	0	sodium ion, liquid	0	0	0	1	0	0	sodium ion, liquid	0	0	0	1	0	0	sodium ion, liquid	0	0	0	1	0	0
TDS, liquid	0	0	0	1.00017	0	0	Sulfuric acid, liquid	0	0	0	1	0	0	Sulfuric acid, liquid	0	0	0	1	0	0	Sulfuric acid, liquid	0	0	0	1	0	0	Sulfuric acid, liquid	0	0	0	1	0	0
tetrahydrofuran, liquid	0	0	0	1.00017	0	0	TDS, liquid	0	0	0	1	0	0	TDS, liquid	0	0	0	1	0	0	TDS, liquid	0	0	0	1	0	0	TDS, liquid	0	0	0	1	0	0
vinyl acetate, liquid	0	0	0	1.00017	0	0	tetrahydrofuran, liquid	0	0	0	1	0	0	tetrahydrofuran, liquid	0	0	0	1	0	0	tetrahydrofuran, liquid	0	0	0	1	0	0	tetrahydrofuran, liquid	0	0	0	1	0	0
Zinc, liquid	0	0	0	1.00017	0	0	vinyl acetate, liquid	0	0	0	1	0	0	vinyl acetate, liquid	0	0	0	1	0	0	vinyl acetate, liquid	0	0	0	1	0	0	vinyl acetate, liquid	0	0	0	1	0	0
2-pyrrolidone, solid	0	0	0	1.00017	0	0	Zinc, liquid	0	0	0	1	0	0	Zinc, liquid	0	0	0	1	0	0	Zinc, liquid	0	0	0	1	0	0	Zinc, liquid	0	0	0	1	0	0
Acetylene, solid	0	0	0	1.00017	0	0	2-pyrrolidone, solid	0	0	0	1	0	0	2-pyrrolidone, solid	0	0	0	1	0	0	2-pyrrolidone, solid	0	0	0	1	0	0	2-pyrrolidone, solid	0	0	0	1	0	0
activated carbon, solid	0	0	0	1.00017	0	0	Acetylene, solid	0	0	0	1	0	0	Acetylene, solid	0	0	0	1	0	0	Acetylene, solid	0	0	0	1	0	0	Acetylene, solid	0	0	0	1	0	0
ARSENIC(V), solid	0	0	0	1.00017	0	0	activated carbon, solid	0	0	0	1	0	0	activated carbon, solid	0	0	0	1	0	0	activated carbon, solid	0	0	0	1	0	0	activated carbon, solid	0	0	0	1	0	0
Ash, solid	0	0	0	1.00017	0	0	ARSENIC(V), solid	0	0	0	1	0	0	ARSENIC(V), solid	0	0	0	1	0	0	ARSENIC(V), solid	0	0	0	1	0	0	ARSENIC(V), solid	0	0	0	1	0	0
Clay, solid	0	0	0	1.00017	0	0	Ash, solid	0	0	0	1	0	0	Ash, solid	0	0	0	1	0	0	Ash, solid	0	0	0	1	0	0	Ash, solid	0	0	0	1	0	0
Coke, solid	0	0	0	1.00017	0	0	Clay, solid	0	0	0	1	0	0	Clay, solid	0	0	0	1	0	0	Clay, solid	0	0	0	1	0	0	Clay, solid	0	0	0	1	0	0
glycerol, solid	0	0	0	1.00017	0	0	Coke, solid	0	0	0	1	0	0	Coke, solid	0	0	0	1	0	0	Coke, solid	0	0	0	1	0	0	Coke, solid	0	0	0	1	0	0
hazardous waste, solid	0	0	0	1.00017	0	0	glycerol, solid	0	0	0	1	0	0	glycerol, solid	0	0	0	1	0	0	glycerol, solid	0	0	0	1	0	0	glycerol, solid	0	0	0	1	0	0
Heavy Waste of NVP, solid	0	0	0	1.00017	0	0	hazardous waste, solid	0	0	0	1	0	0	hazardous waste, solid	0	0	0	1	0	0	hazardous waste, solid	0	0	0	1	0	0	hazardous waste, solid	0	0	0	1	0	0
Heavy waste of pyrrolidone, solid	0	0	0	1.00017	0	0	Heavy Waste of NVP, solid	0	0	0	1	0	0	Heavy Waste of NVP, solid	0	0	0	1	0	0	Heavy Waste of NVP, solid	0	0	0	1	0	0	Heavy Waste of NVP, solid	0	0	0	1	0	0
lead, solid	0	0	0	1.00017	0	0	Heavy waste of pyrrolidone, solid	0	0	0	1	0	0	Heavy waste of pyrrolidone, solid	0	0	0	1	0	0	Heavy waste of pyrrolidone, solid	0	0	0	1	0	0	Heavy waste of pyrrolidone, solid	0	0	0	1	0	0
Mercury, solid	0	0	0	1.00017	0	0	lead, solid	0	0	0	1	0	0	lead, solid	0	0	0	1	0	0	lead, solid	0	0	0	1	0	0	lead, solid	0	0	0	1	0	0
methanol, solid	0	0	0	1.00017	0	0	Mercury, solid	0	0	0	1	0	0	Mercury, solid	0	0	0	1	0	0	Mercury, solid	0	0	0	1	0	0	Mercury, solid	0	0	0	1	0	0
NVP, solid	0	0	0	1.00017	0	0	methanol, solid	0	0	0	1	0	0	methanol, solid	0	0	0	1	0	0	methanol, solid	0	0	0	1	0	0	methanol, solid	0	0	0	1	0	0
organic matter (unspecified), solid	0	0	0	1.00017	0	0	NVP, solid	0	0	0	1	0	0	NVP, solid	0	0	0	1	0	0	NVP, solid	0	0	0	1	0	0	NVP, solid	0	0	0	1	0	0
Potassium chloride, solid	0	0	0	1.00017	0	0	organic matter (unspecified), solid	0	0	0	1	0	0	organic matter (unspecified), solid	0	0	0	1	0	0	organic matter (unspecified), solid	0	0	0	1	0	0	organic matter (unspecified), solid	0	0	0	1	0	0
Potassium Pyrrolidone, solid	0	0	0	1.00017	0	0	Potassium chloride, solid	0	0	0	1	0	0	Potassium chloride, solid	0	0	0	1	0	0	Potassium chloride, solid	0	0	0	1	0	0	Potassium chloride, solid	0	0	0	1	0	0
Sodium chloride, solid	0	0	0	1.00017	0	0	Potassium Pyrrolidone, solid	0	0	0	1	0	0	Potassium Pyrrolidone, solid	0	0	0	1	0	0	Potassium Pyrrolidone, solid	0	0	0	1	0	0	Potassium Pyrrolidone, solid	0	0	0	1	0	0
Sodium hydroxide, solid	0	0	0	1.00017	0	0	Sodium chloride, solid	0	0	0	1	0	0	Sodium chloride, solid	0	0	0	1	0	0	Sodium chloride, solid	0	0	0	1	0	0	Sodium chloride, solid	0	0	0	1	0	0
Solid waste, solid	0	0	0	1.00017	0	0	Sodium hydroxide, solid	0	0	0	1	0	0	Sodium hydroxide, solid	0	0	0	1	0	0	Sodium hydroxide, solid	0	0	0	1	0	0	Sodium hydroxide, solid	0	0	0	1	0	0
starch suppressant, solid	0	0	0	1.00017	0	0	Solid waste, solid	0	0	0	1	0	0	Solid waste, solid	0	0	0	1	0	0	Solid waste, solid	0	0	0	1	0	0	Solid waste, solid	0	0	0	1	0	0
thallium, solid	0	0	0	1.00017	0	0	starch suppressant, solid	0	0	0	1	0	0	starch suppressant, solid	0	0	0	1	0	0	starch suppressant, solid	0	0	0	1	0	0	starch suppressant, solid	0	0	0	1	0	0
Vanadium, solid	0	0	0	1.00017	0	0	thallium, solid	0	0	0	1	0	0	thallium, solid	0	0	0	1	0	0	thallium, solid	0	0	0	1	0	0	thallium, solid	0	0	0	1	0	0
Nitrous oxide, air	-1.22005	-1.22005	0	1	0	0	Vanadium, solid	0	0	0	1	0	0	Vanadium, solid	0	0	0	1	0	0	Vanadium, solid	0	0	0	1	0	0	Vanadium, solid	0	0	0	1	0	0
Total raw materials, raw material	0	0	0	1	0	0	Total raw materials, raw material	0	0	0	1	0	0	Total raw materials, raw material	0	0	0	1	0	0	Total raw materials, raw material	0	0	0	1	0	0	Total raw materials, raw material	0	0	0	1	0	0
0	0	0	0	1	0	0	0	0	0	0	1	0	0	0	0	0	0	1	0	0	0	0	0	0	1	0	0	0	0	0	0	1	0	0
0	0	0	0	1	0	0	0	0	0	0	1	0	0	0	0	0	0	1	0	0	0	0	0	0	1	0	0	0	0	0	0	1	0	0
0	0	0	0	1	0	0	0	0	0	0	1	0	0	0	0	0	0	1	0	0	0	0	0	0	1	0	0	0	0	0	0	1	0	0
0	0	0	0	1	0	0	0	0	0	0	1	0	0	0	0	0	0	1	0	0	0	0	0	0	1	0	0	0	0	0	0	1	0	0
0	0	0	0	1	0	0	0	0	0	0	1	0	0	0	0	0	0	1	0	0	0	0	0	0	1	0	0	0	0	0	0	1	0	0
0	0	0	0	1	0	0	0	0	0	0	1	0	0	0	0	0	0	1	0	0	0	0	0	0	1	0	0	0	0	0	0	1	0	0
name, air	0	0	0	1	0	0	name, air	0	0	0	1	0	0	name, air	0	0	0	1	0	0	name, air	0	0	0	1	0	0	name, air	0	0	0	1	0	0
Total Air emissions, air	0	0	0	1	0	0	Total Air emissions, air	0	0	0	1	0	0	Total Air emissions, air	0	0	0	1	0	0	Total Air emissions, air	0	0	0	1	0	0	Total Air emissions, air	0	0	0	1	0	0
0	0	0	0	1	0	0	0	0	0	0	1	0	0	0	0	0	0	1	0	0	0	0	0	0	1	0	0	0	0	0	0	1	0	0
0	0	0	0	1	0	0	0	0	0	0	1	0	0	0	0	0	0	1	0	0	0	0	0	0	1	0	0	0	0	0	0	1	0	0
name, liquid	0	0	0	1	0	0	name, liquid	0	0	0	1	0	0	name, liquid	0	0	0	1	0	0	name, liquid	0	0	0	1	0	0	name, liquid	0	0	0	1	0	0
Total Water emissions, liquid	0	0	0	1	0	0	Total Water emissions, liquid	0	0	0	1	0	0	Total Water emissions, liquid	0	0	0	1	0	0	Total Water emissions, liquid	0	0	0	1	0	0	Total Water emissions, liquid	0	0	0	1	0	0
0	0	0	0	1	0	0	0	0	0	0	1	0	0	0	0	0	0	1	0	0	0	0	0	0	1	0	0	0	0	0	0	1	0	0
0	0	0	0	1	0	0	0	0	0	0	1	0	0	0	0	0	0	1	0	0	0	0	0	0	1	0	0	0	0	0	0	1	0	0
solid	0	0	0	1	0	0	solid	0	0	0	1	0	0	solid	0	0	0	1	0	0	solid	0	0	0	1	0	0	solid	0	0	0	1	0	0
Total Solid emissions, solid	0	0	0	1	0	0	Total Solid emissions, solid	0	0	0	1	0	0	Total Solid emissions, solid	0	0	0	1	0	0	Total Solid emissions, solid	0	0	0	1	0	0	Total Solid emissions, solid	0	0	0	1	0	0

## Sheet: ethyl cellulose CT
Cradle to gate chemical tree for ethyl cellulose (ethyl cellulose 2p4 DS)
Key	Natural resources	Unallocated	Allocated
Level 1	Level 2	Level 3	Level 4	Level 5	Level 6	Level 7	Level 8	Level 9	Level 10	Level 11
ethyl cellulose 2p4 DS	cellulose	Dissolving pulp	biomass for pulp	blue water
1000	556.78	556.78	3944.07	3087.12
				N in DAP	diammonium phosphate (DAP)	Ammonia	Natural gas	blue water
				1.34598	3.0452	0.782008	0.161142	0.0521431
								Natural gas (unprocessed)
								0.164365
							nitrogen from air	Air (untreated)
							0.300761	0.300762
							oxygen from air	Air (untreated)
							0.133512	0.133512
							Water for rxn	Water (untreated)
							0.208523	0.208523
						Phosphoric acid	Phosphate rock	phosphate ore, in ground
						2.24949	4.87727	17.0077
							Sulfuric acid	Sulfur trioxide	oxygen from air	Air (untreated)
							4.18051	3.39382	2.10784	2.10784
									Sulfur	oil (in ground)
									1.46351	1.50742
									Water for rxn	Water (untreated)
									0.127789	0.127788
								Water for rxn	Water (untreated)
								0.848836	0.848836
							Water for rxn	Water (untreated)
							1.31985	1.31985
				P in DAP	diammonium phosphate (DAP)	Ammonia	Natural gas	blue water
				1.4849	3.3595	0.862719	0.177773	0.0575248
								Natural gas (unprocessed)
								0.181329
							nitrogen from air	Air (untreated)
							0.331803	0.331803
							oxygen from air	Air (untreated)
							0.147292	0.147292
							Water for rxn	Water (untreated)
							0.230045	0.230045
						Phosphoric acid	Phosphate rock	phosphate ore, in ground
						2.48166	5.38065	18.7631
							Sulfuric acid	Sulfur trioxide	oxygen from air	Air (untreated)
							4.61198	3.7441	2.32539	2.32539
									Sulfur	oil (in ground)
									1.61456	1.663
									Water for rxn	Water (untreated)
									0.140977	0.140978
								Water for rxn	Water (untreated)
								0.936444	0.936444
							Water for rxn	Water (untreated)
							1.45607	1.45607
				Urea	Ammonia	Natural gas	blue water
				3.88667	2.20063	0.453466	0.146735
							Natural gas (unprocessed)
							0.462536
						nitrogen from air	Air (untreated)
						0.846366	0.846367
						oxygen from air	Air (untreated)
						0.375714	0.375714
						Water for rxn	Water (untreated)
						0.5868	0.5868
					Carbon dioxide	Natural gas	blue water
					2.84349	0.585934	0.189599
							Natural gas (unprocessed)
							0.597653
						nitrogen from air	Air (untreated)
						1.09361	1.09361
						oxygen from air	Air (untreated)
						0.485468	0.485469
						Water for rxn	Water (untreated)
						0.758218	0.758218
			calcium monoxide	Calcium carbonate	Limestone (in ground)
			15.5357	31.0714	33.4096
			hydrogen peroxide	Benzene	pyrolysis gas	Naphtha	blue water
			15.0346	1.14943	0.333691	0.340224	0.953988
							oil (in ground)
							0.344647
					reformate, from naphtha	Naphtha	blue water
					0.819061	0.831424	2.33131
							oil (in ground)
							0.842233
				Hydrogen	hydrogen from SMR natural gas	Methane	Natural gas	blue water
				0.942534	0.942534	1.97343	1.99692	0.646173
								Natural gas (unprocessed)
								2.03686
						oxygen from air	Air (untreated)
						0.349743	0.349744
						Water for rxn	Water (untreated)
						4.29947	4.29947
				oxygen from air	Air (untreated)
				22.9886	22.9887
			Methane	Natural gas	blue water
			2.50576	2.53559	0.820478
					Natural gas (unprocessed)
					2.5863
			oxygen from air	Air (untreated)
			2246.09	2246.09
			Sodium chlorate	sodium chloride in brine 26 wtpct	salt rock, in ground
			28.5657	64.1327	64.1327
			Sodium hydroxide	sodium chloride in brine 26 wtpct	salt rock, in ground
			95.7201	77.48	77.48
				Water for rxn	Water (untreated)
				22.6161	22.6161
			Sodium sulfate	Sulfuric acid	Sulfur trioxide	oxygen from air	Air (untreated)
			10.5242	3.01255	2.44565	1.51895	1.51895
						Sulfur	oil (in ground)
						1.05463	1.08627
						Water for rxn	Water (untreated)
						0.0920867	0.0920867
					Water for rxn	Water (untreated)
					0.611687	0.611687
				tincal (borax)	B2O3 in tincal ore	borax ore (in ground)
				11.8397	4.76921	18.3431
			Sulfuric acid	Sulfur trioxide	oxygen from air	Air (untreated)
			26.0599	21.156	13.1396	13.1396
					Sulfur	oil (in ground)
					9.12306	9.39675
					Water for rxn	Water (untreated)
					0.796591	0.796591
				Water for rxn	Water (untreated)
				5.29136	5.29136
	Chloroethane	Ethylene	Naphtha	blue water
	851.528	374.672	382.008	1071.15
				oil (in ground)
				386.974
		Hydrogen chloride	Chlorine	sodium chloride in brine 26 wtpct	salt rock, in ground
		486.222	350.57	283.767	283.767
				Water for rxn	Water (untreated)
				82.8301	82.8301
			Ethylene	Naphtha	blue water
			138.253	140.96	395.251
					oil (in ground)
					142.792
	Sodium hydroxide	sodium chloride in brine 26 wtpct	salt rock, in ground
	556.78	450.682	450.682
		Water for rxn	Water (untreated)
		131.552	131.552
	toluene	pyrolysis gas	Naphtha	blue water
	85.6686	24.8704	25.3573	71.1019
				oil (in ground)
				25.687
		reformate, from naphtha	Naphtha	blue water
		61.0456	61.967	173.756
				oil (in ground)
				62.7726

## Sheet: ethyl cellulose CC
Material:	ethyl cellulose (ethyl cellulose 2p4 DS)
Date:	6Jun2024
GWP 100, kg CO2							Acidification, kg SO2							Eutrophication, kg N							OzoneDepletion, kg CFC-11							Smog, kg O3
Chemicals	Total impact	Energy impact	Process impact	Cumulative impact	Process / Total this chemical	Process / Total this category	Chemicals	Total impact	Energy impact	Process impact	Cumulative impact	Process / Total this chemical	Process / Total this category	Chemicals	Total impact	Energy impact	Process impact	Cumulative impact	Process / Total this chemical	Process / Total this category	Chemicals	Total impact	Energy impact	Process impact	Cumulative impact	Process / Total this chemical	Process / Total this category	Chemicals	Total impact	Energy impact	Process impact	Cumulative impact	Process / Total this chemical	Process / Total this category
Total	3455.32	4232.69	-777.37			0.0165348	Total	32.3272	19.8632	12.464			0.385557	Total	0.903775	0.519332	0.384443			0.425375	Total	1.78627e-05	1.78627e-05	0			0	Total	573.835	275.213	298.621			0.520396
Carbon dioxide, air	3995.21	3947.67	-801	0.928285	0.0118975	0.0110443	sulfur dioxide, air	12.4105	12.1198	0.290668	0.383903	0.0234212	0.00899145	NOx, air	0.465597	0.463632	0.00196578	0.515169	0.00422206	0.00217508	methyl bromide, air	1.30584e-05	1.30584e-05	0	0.731042	0	0	NOx, air	260.642	259.541	1.10045	0.454211	0.00422206	0.00191771
Methane, air	307.383	283.754	23.6292	0.999706	0.0768721	0.00549023	Hydrogen chloride, air	11.2798	0	11.2798	0.732829	1	0.348927	ammonium as N, liquid	0.374688	0	0.374688	0.92975	1	0.414581	methyl chloride, air	1.75972e-06	1.75972e-06	0	0.829555	0	0	toluene, air	81.5041	0	81.5041	0.596245	1	0.142034
Nitrous oxide, air	1.22741	1.22607	0.00134409	0.999991	0.00109506	3.12299e-07	NOx, air	7.35873	7.32766	0.031069	0.960462	0.00422206	0.00096108	Nitric oxide, air	0.0209512	0.0202101	0.000741068	0.952932	0.0353712	0.000819969	Methyl chloroform, air	9.0638e-07	9.0638e-07	0	0.880297	0	0	Chlorine, air	78.0263	0	78.0263	0.732218	1	0.135974
chlorodifluoromethane, air	0.0322689	0.0322689	0	0.999998	0	0	SOx, air	0.619622	0.0211126	0.598509	0.97963	0.965927	0.0185141	Phosphorus emission, liquid	0.0121821	0.0121821	0	0.966411	0	0	chlorodifluoromethane, air	8.91406e-07	8.91406e-07	0	0.9302	0	0	Naphtha, air	41.8235	0	41.8235	0.805103	1	0.0728842
CFC-113, air	0.00197391	0.00197391	0	0.999999	0	0	Nitric oxide, air	0.326885	0.315323	0.0115623	0.989741	0.0353712	0.000357665	nitrogen, atomic, liquid	0.010076	0.010076	0	0.97756	0	0	carbon tetrachloride, air	7.00629e-07	7.00629e-07	0	0.969423	0	0	Ethylene, air	35.4422	0	35.4422	0.866866	1	0.0617638
carbon tetrachloride, air	0.00134367	0.00134367	0	0.999999	0	0	Ammonia, air	0.148537	0.0550739	0.0934626	0.994336	0.629223	0.00289115	Ammonia, air	0.00937044	0.00347435	0.0058961	0.987928	0.629223	0.00652386	CFC-113, air	3.22008e-07	3.22008e-07	0	0.98745	0	0	Propylene, air	20.5712	0	20.5712	0.902715	1	0.0358486
methyl chloride, air	0.00114382	0.00114382	0	0.999999	0	0	Sulfur trioxide, air	0.147219	0	0.147219	0.99889	1	0.00455403	nitrogen, atomic, air	0.00666388	0.00666388	0	0.995302	0	0	CFC-114, air	1.13363e-07	1.13363e-07	0	0.993796	0	0	pyrolysis gas, air	12.8474	0	12.8474	0.925104	1	0.0223886
CFC-114, air	0.00113363	0.00113363	0	1	0	0	Nitrogen dioxide, air	0.0358786	0.0242381	0.0116405	1	0.324441	0.000360083	Nitrogen dioxide, air	0.00227009	0.00153358	0.00073651	0.997813	0.324441	0.000814926	CFC-11, air	1.10815e-07	1.10815e-07	0	1	0	0	diethyl ether, air	8.96164	0	8.96164	0.940721	1	0.0156171
Methyl chloroform, air	0.00110276	0.00110276	0	1	0	0	Hydrogen fluoride, air	8.93206e-07	0	8.93206e-07	1	1	2.76302e-08	Ammonia, liquid	0.00156064	0.00156064	0	0.99954	0	0	Air (untreated), raw material	0	0	0	1	0	0	Nitric oxide, air	7.57444	7.30652	0.267917	0.95392	0.0353712	0.000466888
CFC-11, air	0.000526373	0.000526373	0	1	0	0	Air (untreated), raw material	0	0	0	1	0	0	COD, liquid	0.00028222	0	0.00028222	0.999853	1	0.000312268	bauxite ore (in ground), raw material	0	0	0	1	0	0	NMVOC, air	6.38081	5.95108	0.429727	0.96504	0.0673468	0.000748869
methyl bromide, air	0.000128023	0.000128023	0	1	0	0	bauxite ore (in ground), raw material	0	0	0	1	0	0	BOD5, liquid	0.000133221	0	0.000133221	1	1	0.000147404	blue water, raw material	0	0	0	1	0	0	Chloroethane, air	4.92617	0	4.92617	0.973625	1	0.00858464
Air (untreated), raw material	0	0	0	1	0	0	blue water, raw material	0	0	0	1	0	0	BOD, liquid	3.87159e-08	0	3.87159e-08	1	1	4.2838e-08	borax ore (in ground), raw material	0	0	0	1	0	0	Vinyl Chloride, air	4.3409	0	4.3409	0.981189	1	0.00756472
bauxite ore (in ground), raw material	0	0	0	1	0	0	borax ore (in ground), raw material	0	0	0	1	0	0	Air (untreated), raw material	0	0	0	1	0	0	coal (in ground), raw material	0	0	0	1	0	0	Benzene, air	2.31583	1.08656	1.22927	0.985225	0.530812	0.0021422
blue water, raw material	0	0	0	1	0	0	coal (in ground), raw material	0	0	0	1	0	0	bauxite ore (in ground), raw material	0	0	0	1	0	0	Limestone (in ground), raw material	0	0	0	1	0	0	Butene, air	1.79487	0	1.79487	0.988353	1	0.00312785
borax ore (in ground), raw material	0	0	0	1	0	0	Limestone (in ground), raw material	0	0	0	1	0	0	blue water, raw material	0	0	0	1	0	0	Natural gas (unprocessed), raw material	0	0	0	1	0	0	dichloroethane,-1,2, air	1.6726	0	1.6726	0.991268	1	0.00291477
coal (in ground), raw material	0	0	0	1	0	0	Natural gas (unprocessed), raw material	0	0	0	1	0	0	borax ore (in ground), raw material	0	0	0	1	0	0	oil (in ground), raw material	0	0	0	1	0	0	1,3-butadiene, air	1.34362	0	1.34362	0.993609	1	0.00234147
Limestone (in ground), raw material	0	0	0	1	0	0	oil (in ground), raw material	0	0	0	1	0	0	coal (in ground), raw material	0	0	0	1	0	0	phosphate ore, in ground, raw material	0	0	0	1	0	0	ethanol, air	1.13122	0	1.13122	0.99558	1	0.00197133
Natural gas (unprocessed), raw material	0	0	0	1	0	0	phosphate ore, in ground, raw material	0	0	0	1	0	0	Limestone (in ground), raw material	0	0	0	1	0	0	salt rock, in ground, raw material	0	0	0	1	0	0	Nitrogen dioxide, air	0.863409	0.583284	0.280125	0.997085	0.324441	0.000488164
oil (in ground), raw material	0	0	0	1	0	0	salt rock, in ground, raw material	0	0	0	1	0	0	Natural gas (unprocessed), raw material	0	0	0	1	0	0	sand (in ground), raw material	0	0	0	1	0	0	n-hexane, air	0.351085	0	0.351085	0.997697	1	0.000611823
phosphate ore, in ground, raw material	0	0	0	1	0	0	sand (in ground), raw material	0	0	0	1	0	0	oil (in ground), raw material	0	0	0	1	0	0	Uranium, raw material	0	0	0	1	0	0	Carbon monoxide, air	0.32723	0.326201	0.00102939	0.998267	0.00314577	1.79388e-06
salt rock, in ground, raw material	0	0	0	1	0	0	Uranium, raw material	0	0	0	1	0	0	phosphate ore, in ground, raw material	0	0	0	1	0	0	Water (untreated), raw material	0	0	0	1	0	0	cyclohexane, air	0.293797	0	0.293797	0.998779	1	0.000511988
sand (in ground), raw material	0	0	0	1	0	0	Water (untreated), raw material	0	0	0	1	0	0	salt rock, in ground, raw material	0	0	0	1	0	0	0	0	0	0	1	0	0	isoprene, air	0.239795	0.239795	0	0.999197	0	0
Uranium, raw material	0	0	0	1	0	0	0	0	0	0	1	0	0	sand (in ground), raw material	0	0	0	1	0	0	0	0	0	0	1	0	0	Methane, air	0.1768	0.163209	0.013591	0.999505	0.0768721	2.36845e-05
Water (untreated), raw material	0	0	0	1	0	0	0	0	0	0	1	0	0	Uranium, raw material	0	0	0	1	0	0	0	0	0	0	1	0	0	Propyne, air	0.0859321	0	0.0859321	0.999655	1	0.000149751
0	0	0	0	1	0	0	0	0	0	0	1	0	0	Water (untreated), raw material	0	0	0	1	0	0	0	0	0	0	1	0	0	Butane, air	0.0727396	0	0.0727396	0.999782	1	0.000126761
0	0	0	0	1	0	0	0	0	0	0	1	0	0	0	0	0	0	1	0	0	0	0	0	0	1	0	0	Ethane, air	0.0511471	0	0.0511471	0.999871	1	8.91321e-05
0	0	0	0	1	0	0	0	0	0	0	1	0	0	0	0	0	0	1	0	0	0	0	0	0	1	0	0	heptane, air	0.0163383	0	0.0163383	0.999899	1	2.84722e-05
0	0	0	0	1	0	0	0	0	0	0	1	0	0	0	0	0	0	1	0	0	0	0	0	0	1	0	0	formaldehyde, air	0.0153273	0.0153273	0	0.999926	0	0
0	0	0	0	1	0	0	0	0	0	0	1	0	0	0	0	0	0	1	0	0	0	0	0	0	1	0	0	Acetylene, air	0.0136175	0	0.0136175	0.99995	1	2.37307e-05
0	0	0	0	1	0	0	0	0	0	0	1	0	0	0	0	0	0	1	0	0	0	0	0	0	1	0	0	Octane, air	0.0102525	0	0.0102525	0.999968	1	1.78667e-05
0	0	0	0	1	0	0	0	0	0	0	1	0	0	0	0	0	0	1	0	0	0	0	0	0	1	0	0	n-Pentane, air	0.0097878	0	0.0097878	0.999985	1	1.70568e-05
0	0	0	0	1	0	0	0	0	0	0	1	0	0	0	0	0	0	1	0	0	0	0	0	0	1	0	0	Propane, air	0.00819505	0	0.00819505	0.999999	1	1.42812e-05
0	0	0	0	1	0	0	0	0	0	0	1	0	0	0	0	0	0	1	0	0	0	0	0	0	1	0	0	Isobutane, air	0.000644984	0	0.000644984	1	1	1.12399e-06
0	0	0	0	1	0	0	0	0	0	0	1	0	0	0	0	0	0	1	0	0	0	0	0	0	1	0	0	methyl chloride, air	3.37168e-06	3.37168e-06	0	1	0	0
0	0	0	0	1	0	0	0	0	0	0	1	0	0	0	0	0	0	1	0	0	0	0	0	0	1	0	0	methyl bromide, air	4.79208e-07	4.79208e-07	0	1	0	0
0	0	0	0	1	0	0	0	0	0	0	1	0	0	0	0	0	0	1	0	0	0	0	0	0	1	0	0	Methyl chloroform, air	3.68575e-08	3.68575e-08	0	1	0	0
0	0	0	0	1	0	0	0	0	0	0	1	0	0	0	0	0	0	1	0	0	0	0	0	0	1	0	0	Air (untreated), raw material	0	0	0	1	0	0
0	0	0	0	1	0	0	0	0	0	0	1	0	0	0	0	0	0	1	0	0	0	0	0	0	1	0	0	bauxite ore (in ground), raw material	0	0	0	1	0	0
0	0	0	0	1	0	0	0	0	0	0	1	0	0	0	0	0	0	1	0	0	1,3-butadiene, air	0	0	0	1	0	0	blue water, raw material	0	0	0	1	0	0
0	0	0	0	1	0	0	1,3-butadiene, air	0	0	0	1	0	0	0	0	0	0	1	0	0	Acetylene, air	0	0	0	1	0	0	borax ore (in ground), raw material	0	0	0	1	0	0
0	0	0	0	1	0	0	Acetylene, air	0	0	0	1	0	0	0	0	0	0	1	0	0	Ammonia, air	0	0	0	1	0	0	coal (in ground), raw material	0	0	0	1	0	0
1,3-butadiene, air	0	0	0	1	0	0	Argon, air	0	0	0	1	0	0	0	0	0	0	1	0	0	Argon, air	0	0	0	1	0	0	Limestone (in ground), raw material	0	0	0	1	0	0
Acetylene, air	0	0	0	1	0	0	Arsenic, air	0	0	0	1	0	0	1,3-butadiene, air	0	0	0	1	0	0	Arsenic, air	0	0	0	1	0	0	Natural gas (unprocessed), raw material	0	0	0	1	0	0
Ammonia, air	0	0	0	1	0	0	Benzene, air	0	0	0	1	0	0	Acetylene, air	0	0	0	1	0	0	Benzene, air	0	0	0	1	0	0	oil (in ground), raw material	0	0	0	1	0	0
Argon, air	0	0	0	1	0	0	beryllium, air	0	0	0	1	0	0	Argon, air	0	0	0	1	0	0	beryllium, air	0	0	0	1	0	0	phosphate ore, in ground, raw material	0	0	0	1	0	0
Arsenic, air	0	0	0	1	0	0	Boric acid, air	0	0	0	1	0	0	Arsenic, air	0	0	0	1	0	0	Boric acid, air	0	0	0	1	0	0	salt rock, in ground, raw material	0	0	0	1	0	0
Benzene, air	0	0	0	1	0	0	Butane, air	0	0	0	1	0	0	Benzene, air	0	0	0	1	0	0	Butane, air	0	0	0	1	0	0	sand (in ground), raw material	0	0	0	1	0	0
beryllium, air	0	0	0	1	0	0	Butene, air	0	0	0	1	0	0	beryllium, air	0	0	0	1	0	0	Butene, air	0	0	0	1	0	0	Uranium, raw material	0	0	0	1	0	0
Boric acid, air	0	0	0	1	0	0	cadmium, air	0	0	0	1	0	0	Boric acid, air	0	0	0	1	0	0	cadmium, air	0	0	0	1	0	0	Water (untreated), raw material	0	0	0	1	0	0
Butane, air	0	0	0	1	0	0	Carbon dioxide, air	0	0	0	1	0	0	Butane, air	0	0	0	1	0	0	Carbon dioxide, air	0	0	0	1	0	0	0	0	0	0	1	0	0
Butene, air	0	0	0	1	0	0	Carbon dioxide, biogenic, air	0	0	0	1	0	0	Butene, air	0	0	0	1	0	0	Carbon dioxide, biogenic, air	0	0	0	1	0	0	0	0	0	0	1	0	0
cadmium, air	0	0	0	1	0	0	Carbon monoxide, air	0	0	0	1	0	0	cadmium, air	0	0	0	1	0	0	Carbon monoxide, air	0	0	0	1	0	0	0	0	0	0	1	0	0
Carbon dioxide, biogenic, air	0	0	0	1	0	0	carbon tetrachloride, air	0	0	0	1	0	0	Carbon dioxide, air	0	0	0	1	0	0	carbon tetrafluoride, air	0	0	0	1	0	0	0	0	0	0	1	0	0
Carbon monoxide, air	0	0	0	1	0	0	carbon tetrafluoride, air	0	0	0	1	0	0	Carbon dioxide, biogenic, air	0	0	0	1	0	0	Chlorine, air	0	0	0	1	0	0	0	0	0	0	1	0	0
carbon tetrafluoride, air	0	0	0	1	0	0	CFC-11, air	0	0	0	1	0	0	Carbon monoxide, air	0	0	0	1	0	0	Chloroethane, air	0	0	0	1	0	0	0	0	0	0	1	0	0
Chlorine, air	0	0	0	1	0	0	CFC-113, air	0	0	0	1	0	0	carbon tetrachloride, air	0	0	0	1	0	0	chromium, air	0	0	0	1	0	0	0	0	0	0	1	0	0
Chloroethane, air	0	0	0	1	0	0	CFC-114, air	0	0	0	1	0	0	carbon tetrafluoride, air	0	0	0	1	0	0	chromium VI, air	0	0	0	1	0	0	0	0	0	0	1	0	0
chromium, air	0	0	0	1	0	0	Chlorine, air	0	0	0	1	0	0	CFC-11, air	0	0	0	1	0	0	COD, air	0	0	0	1	0	0	0	0	0	0	1	0	0
chromium VI, air	0	0	0	1	0	0	chlorodifluoromethane, air	0	0	0	1	0	0	CFC-113, air	0	0	0	1	0	0	cyclohexane, air	0	0	0	1	0	0	0	0	0	0	1	0	0
COD, air	0	0	0	1	0	0	Chloroethane, air	0	0	0	1	0	0	CFC-114, air	0	0	0	1	0	0	dichloroethane,-1,2, air	0	0	0	1	0	0	0	0	0	0	1	0	0
cyclohexane, air	0	0	0	1	0	0	chromium, air	0	0	0	1	0	0	Chlorine, air	0	0	0	1	0	0	diethyl ether, air	0	0	0	1	0	0	0	0	0	0	1	0	0
dichloroethane,-1,2, air	0	0	0	1	0	0	chromium VI, air	0	0	0	1	0	0	chlorodifluoromethane, air	0	0	0	1	0	0	Ethane, air	0	0	0	1	0	0	0	0	0	0	1	0	0
diethyl ether, air	0	0	0	1	0	0	COD, air	0	0	0	1	0	0	Chloroethane, air	0	0	0	1	0	0	ethanol, air	0	0	0	1	0	0	0	0	0	0	1	0	0
Ethane, air	0	0	0	1	0	0	cyclohexane, air	0	0	0	1	0	0	chromium, air	0	0	0	1	0	0	Ethylene, air	0	0	0	1	0	0	0	0	0	0	1	0	0
ethanol, air	0	0	0	1	0	0	dichloroethane,-1,2, air	0	0	0	1	0	0	chromium VI, air	0	0	0	1	0	0	formaldehyde, air	0	0	0	1	0	0	0	0	0	0	1	0	0
Ethylene, air	0	0	0	1	0	0	diethyl ether, air	0	0	0	1	0	0	COD, air	0	0	0	1	0	0	gas from explosives, air	0	0	0	1	0	0	0	0	0	0	1	0	0
formaldehyde, air	0	0	0	1	0	0	Ethane, air	0	0	0	1	0	0	cyclohexane, air	0	0	0	1	0	0	heptane, air	0	0	0	1	0	0	Ammonia, air	0	0	0	1	0	0
gas from explosives, air	0	0	0	1	0	0	ethanol, air	0	0	0	1	0	0	dichloroethane,-1,2, air	0	0	0	1	0	0	HFC-152a, air	0	0	0	1	0	0	Argon, air	0	0	0	1	0	0
heptane, air	0	0	0	1	0	0	Ethylene, air	0	0	0	1	0	0	diethyl ether, air	0	0	0	1	0	0	Hydrogen, air	0	0	0	1	0	0	Arsenic, air	0	0	0	1	0	0
HFC-152a, air	0	0	0	1	0	0	formaldehyde, air	0	0	0	1	0	0	Ethane, air	0	0	0	1	0	0	Hydrogen chloride, air	0	0	0	1	0	0	beryllium, air	0	0	0	1	0	0
Hydrogen, air	0	0	0	1	0	0	gas from explosives, air	0	0	0	1	0	0	ethanol, air	0	0	0	1	0	0	Hydrogen fluoride, air	0	0	0	1	0	0	Boric acid, air	0	0	0	1	0	0
Hydrogen chloride, air	0	0	0	1	0	0	heptane, air	0	0	0	1	0	0	Ethylene, air	0	0	0	1	0	0	Hydrogen sulfide, air	0	0	0	1	0	0	cadmium, air	0	0	0	1	0	0
Hydrogen fluoride, air	0	0	0	1	0	0	HFC-152a, air	0	0	0	1	0	0	formaldehyde, air	0	0	0	1	0	0	Isobutane, air	0	0	0	1	0	0	Carbon dioxide, air	0	0	0	1	0	0
Hydrogen sulfide, air	0	0	0	1	0	0	Hydrogen, air	0	0	0	1	0	0	gas from explosives, air	0	0	0	1	0	0	isoprene, air	0	0	0	1	0	0	Carbon dioxide, biogenic, air	0	0	0	1	0	0
Isobutane, air	0	0	0	1	0	0	Hydrogen sulfide, air	0	0	0	1	0	0	heptane, air	0	0	0	1	0	0	lead, air	0	0	0	1	0	0	carbon tetrachloride, air	0	0	0	1	0	0
isoprene, air	0	0	0	1	0	0	Isobutane, air	0	0	0	1	0	0	HFC-152a, air	0	0	0	1	0	0	Mercury, air	0	0	0	1	0	0	carbon tetrafluoride, air	0	0	0	1	0	0
lead, air	0	0	0	1	0	0	isoprene, air	0	0	0	1	0	0	Hydrogen, air	0	0	0	1	0	0	metals (unspecified), air	0	0	0	1	0	0	CFC-11, air	0	0	0	1	0	0
Mercury, air	0	0	0	1	0	0	lead, air	0	0	0	1	0	0	Hydrogen chloride, air	0	0	0	1	0	0	Methane, air	0	0	0	1	0	0	CFC-113, air	0	0	0	1	0	0
metals (unspecified), air	0	0	0	1	0	0	Mercury, air	0	0	0	1	0	0	Hydrogen fluoride, air	0	0	0	1	0	0	Naphtha, air	0	0	0	1	0	0	CFC-114, air	0	0	0	1	0	0
Naphtha, air	0	0	0	1	0	0	metals (unspecified), air	0	0	0	1	0	0	Hydrogen sulfide, air	0	0	0	1	0	0	n-hexane, air	0	0	0	1	0	0	chlorodifluoromethane, air	0	0	0	1	0	0
n-hexane, air	0	0	0	1	0	0	Methane, air	0	0	0	1	0	0	Isobutane, air	0	0	0	1	0	0	nickel, air	0	0	0	1	0	0	chromium, air	0	0	0	1	0	0
nickel, air	0	0	0	1	0	0	methyl bromide, air	0	0	0	1	0	0	isoprene, air	0	0	0	1	0	0	Nitric oxide, air	0	0	0	1	0	0	chromium VI, air	0	0	0	1	0	0
Nitric oxide, air	0	0	0	1	0	0	methyl chloride, air	0	0	0	1	0	0	lead, air	0	0	0	1	0	0	Nitrogen dioxide, air	0	0	0	1	0	0	COD, air	0	0	0	1	0	0
Nitrogen dioxide, air	0	0	0	1	0	0	Methyl chloroform, air	0	0	0	1	0	0	Mercury, air	0	0	0	1	0	0	nitrogen, atomic, air	0	0	0	1	0	0	gas from explosives, air	0	0	0	1	0	0
nitrogen, atomic, air	0	0	0	1	0	0	Naphtha, air	0	0	0	1	0	0	metals (unspecified), air	0	0	0	1	0	0	Nitrous oxide, air	0	0	0	1	0	0	HFC-152a, air	0	0	0	1	0	0
NMVOC, air	0	0	0	1	0	0	n-hexane, air	0	0	0	1	0	0	Methane, air	0	0	0	1	0	0	NMVOC, air	0	0	0	1	0	0	Hydrogen, air	0	0	0	1	0	0
NOx, air	0	0	0	1	0	0	nickel, air	0	0	0	1	0	0	methyl bromide, air	0	0	0	1	0	0	NOx, air	0	0	0	1	0	0	Hydrogen chloride, air	0	0	0	1	0	0
n-Pentane, air	0	0	0	1	0	0	nitrogen, atomic, air	0	0	0	1	0	0	methyl chloride, air	0	0	0	1	0	0	n-Pentane, air	0	0	0	1	0	0	Hydrogen fluoride, air	0	0	0	1	0	0
Octane, air	0	0	0	1	0	0	Nitrous oxide, air	0	0	0	1	0	0	Methyl chloroform, air	0	0	0	1	0	0	Octane, air	0	0	0	1	0	0	Hydrogen sulfide, air	0	0	0	1	0	0
organic matter (unspecified), air	0	0	0	1	0	0	NMVOC, air	0	0	0	1	0	0	Naphtha, air	0	0	0	1	0	0	organic matter (unspecified), air	0	0	0	1	0	0	lead, air	0	0	0	1	0	0
Particulate matter, air	0	0	0	1	0	0	n-Pentane, air	0	0	0	1	0	0	n-hexane, air	0	0	0	1	0	0	Particulate matter, air	0	0	0	1	0	0	Mercury, air	0	0	0	1	0	0
particulate matter 2.5, air	0	0	0	1	0	0	Octane, air	0	0	0	1	0	0	nickel, air	0	0	0	1	0	0	particulate matter 2.5, air	0	0	0	1	0	0	metals (unspecified), air	0	0	0	1	0	0
perfluoroethane, air	0	0	0	1	0	0	organic matter (unspecified), air	0	0	0	1	0	0	Nitrous oxide, air	0	0	0	1	0	0	perfluoroethane, air	0	0	0	1	0	0	nickel, air	0	0	0	1	0	0
PM10, air	0	0	0	1	0	0	Particulate matter, air	0	0	0	1	0	0	NMVOC, air	0	0	0	1	0	0	PM10, air	0	0	0	1	0	0	nitrogen, atomic, air	0	0	0	1	0	0
Propane, air	0	0	0	1	0	0	particulate matter 2.5, air	0	0	0	1	0	0	n-Pentane, air	0	0	0	1	0	0	Propane, air	0	0	0	1	0	0	Nitrous oxide, air	0	0	0	1	0	0
Propylene, air	0	0	0	1	0	0	perfluoroethane, air	0	0	0	1	0	0	Octane, air	0	0	0	1	0	0	Propylene, air	0	0	0	1	0	0	organic matter (unspecified), air	0	0	0	1	0	0
Propyne, air	0	0	0	1	0	0	PM10, air	0	0	0	1	0	0	organic matter (unspecified), air	0	0	0	1	0	0	Propyne, air	0	0	0	1	0	0	Particulate matter, air	0	0	0	1	0	0
pyrolysis gas, air	0	0	0	1	0	0	Propane, air	0	0	0	1	0	0	Particulate matter, air	0	0	0	1	0	0	pyrolysis gas, air	0	0	0	1	0	0	particulate matter 2.5, air	0	0	0	1	0	0
silver, air	0	0	0	1	0	0	Propylene, air	0	0	0	1	0	0	particulate matter 2.5, air	0	0	0	1	0	0	silver, air	0	0	0	1	0	0	perfluoroethane, air	0	0	0	1	0	0
Sodium chlorate, air	0	0	0	1	0	0	Propyne, air	0	0	0	1	0	0	perfluoroethane, air	0	0	0	1	0	0	Sodium chlorate, air	0	0	0	1	0	0	PM10, air	0	0	0	1	0	0
Sodium sulfate, air	0	0	0	1	0	0	pyrolysis gas, air	0	0	0	1	0	0	PM10, air	0	0	0	1	0	0	Sodium sulfate, air	0	0	0	1	0	0	silver, air	0	0	0	1	0	0
SOx, air	0	0	0	1	0	0	silver, air	0	0	0	1	0	0	Propane, air	0	0	0	1	0	0	SOx, air	0	0	0	1	0	0	Sodium chlorate, air	0	0	0	1	0	0
Sulfur, air	0	0	0	1	0	0	Sodium chlorate, air	0	0	0	1	0	0	Propylene, air	0	0	0	1	0	0	Sulfur, air	0	0	0	1	0	0	Sodium sulfate, air	0	0	0	1	0	0
sulfur dioxide, air	0	0	0	1	0	0	Sodium sulfate, air	0	0	0	1	0	0	Propyne, air	0	0	0	1	0	0	sulfur dioxide, air	0	0	0	1	0	0	SOx, air	0	0	0	1	0	0
Sulfur hexafluoride, air	0	0	0	1	0	0	Sulfur, air	0	0	0	1	0	0	pyrolysis gas, air	0	0	0	1	0	0	Sulfur hexafluoride, air	0	0	0	1	0	0	Sulfur, air	0	0	0	1	0	0
Sulfur trioxide, air	0	0	0	1	0	0	Sulfur hexafluoride, air	0	0	0	1	0	0	silver, air	0	0	0	1	0	0	Sulfur trioxide, air	0	0	0	1	0	0	sulfur dioxide, air	0	0	0	1	0	0
toluene, air	0	0	0	1	0	0	toluene, air	0	0	0	1	0	0	Sodium chlorate, air	0	0	0	1	0	0	toluene, air	0	0	0	1	0	0	Sulfur hexafluoride, air	0	0	0	1	0	0
Urea, air	0	0	0	1	0	0	Urea, air	0	0	0	1	0	0	Sodium sulfate, air	0	0	0	1	0	0	Urea, air	0	0	0	1	0	0	Sulfur trioxide, air	0	0	0	1	0	0
Vinyl Chloride, air	0	0	0	1	0	0	Vinyl Chloride, air	0	0	0	1	0	0	SOx, air	0	0	0	1	0	0	Vinyl Chloride, air	0	0	0	1	0	0	Urea, air	0	0	0	1	0	0
VOCs (unspecified), air	0	0	0	1	0	0	VOCs (unspecified), air	0	0	0	1	0	0	Sulfur, air	0	0	0	1	0	0	VOCs (unspecified), air	0	0	0	1	0	0	VOCs (unspecified), air	0	0	0	1	0	0
Zinc, air	0	0	0	1	0	0	Zinc, air	0	0	0	1	0	0	sulfur dioxide, air	0	0	0	1	0	0	Zinc, air	0	0	0	1	0	0	Zinc, air	0	0	0	1	0	0
Ammonia, liquid	0	0	0	1	0	0	Ammonia, liquid	0	0	0	1	0	0	Sulfur hexafluoride, air	0	0	0	1	0	0	Ammonia, liquid	0	0	0	1	0	0	Ammonia, liquid	0	0	0	1	0	0
ammonium as N, liquid	0	0	0	1	0	0	ammonium as N, liquid	0	0	0	1	0	0	Sulfur trioxide, air	0	0	0	1	0	0	ammonium as N, liquid	0	0	0	1	0	0	ammonium as N, liquid	0	0	0	1	0	0
Arsenic, liquid	0	0	0	1	0	0	Arsenic, liquid	0	0	0	1	0	0	toluene, air	0	0	0	1	0	0	Arsenic, liquid	0	0	0	1	0	0	Arsenic, liquid	0	0	0	1	0	0
barium, liquid	0	0	0	1	0	0	barium, liquid	0	0	0	1	0	0	Urea, air	0	0	0	1	0	0	barium, liquid	0	0	0	1	0	0	barium, liquid	0	0	0	1	0	0
Benzene, liquid	0	0	0	1	0	0	Benzene, liquid	0	0	0	1	0	0	Vinyl Chloride, air	0	0	0	1	0	0	Benzene, liquid	0	0	0	1	0	0	Benzene, liquid	0	0	0	1	0	0
BOD, liquid	0	0	0	1	0	0	BOD, liquid	0	0	0	1	0	0	VOCs (unspecified), air	0	0	0	1	0	0	BOD, liquid	0	0	0	1	0	0	BOD, liquid	0	0	0	1	0	0
BOD5, liquid	0	0	0	1	0	0	BOD5, liquid	0	0	0	1	0	0	Zinc, air	0	0	0	1	0	0	BOD5, liquid	0	0	0	1	0	0	BOD5, liquid	0	0	0	1	0	0
Boron, liquid	0	0	0	1	0	0	Boron, liquid	0	0	0	1	0	0	Arsenic, liquid	0	0	0	1	0	0	Boron, liquid	0	0	0	1	0	0	Boron, liquid	0	0	0	1	0	0
Chloride, liquid	0	0	0	1	0	0	Chloride, liquid	0	0	0	1	0	0	barium, liquid	0	0	0	1	0	0	Chloride, liquid	0	0	0	1	0	0	Chloride, liquid	0	0	0	1	0	0
Chlorine, liquid	0	0	0	1	0	0	Chlorine, liquid	0	0	0	1	0	0	Benzene, liquid	0	0	0	1	0	0	Chlorine, liquid	0	0	0	1	0	0	Chlorine, liquid	0	0	0	1	0	0
Chlorine dioxide, liquid	0	0	0	1	0	0	Chlorine dioxide, liquid	0	0	0	1	0	0	Boron, liquid	0	0	0	1	0	0	Chlorine dioxide, liquid	0	0	0	1	0	0	Chlorine dioxide, liquid	0	0	0	1	0	0
Chloroethane, liquid	0	0	0	1	0	0	Chloroethane, liquid	0	0	0	1	0	0	Chloride, liquid	0	0	0	1	0	0	Chloroethane, liquid	0	0	0	1	0	0	Chloroethane, liquid	0	0	0	1	0	0
chromium, liquid	0	0	0	1	0	0	chromium, liquid	0	0	0	1	0	0	Chlorine, liquid	0	0	0	1	0	0	chromium, liquid	0	0	0	1	0	0	chromium, liquid	0	0	0	1	0	0
Chromium III, liquid	0	0	0	1	0	0	Chromium III, liquid	0	0	0	1	0	0	Chlorine dioxide, liquid	0	0	0	1	0	0	Chromium III, liquid	0	0	0	1	0	0	Chromium III, liquid	0	0	0	1	0	0
Chromium VI, liquid	0	0	0	1	0	0	Chromium VI, liquid	0	0	0	1	0	0	Chloroethane, liquid	0	0	0	1	0	0	Chromium VI, liquid	0	0	0	1	0	0	Chromium VI, liquid	0	0	0	1	0	0
COD, liquid	0	0	0	1	0	0	COD, liquid	0	0	0	1	0	0	chromium, liquid	0	0	0	1	0	0	COD, liquid	0	0	0	1	0	0	COD, liquid	0	0	0	1	0	0
diammonium phosphate (DAP), liquid	0	0	0	1	0	0	diammonium phosphate (DAP), liquid	0	0	0	1	0	0	Chromium III, liquid	0	0	0	1	0	0	diammonium phosphate (DAP), liquid	0	0	0	1	0	0	diammonium phosphate (DAP), liquid	0	0	0	1	0	0
dichloroethane,-1,2, liquid	0	0	0	1	0	0	dichloroethane,-1,2, liquid	0	0	0	1	0	0	Chromium VI, liquid	0	0	0	1	0	0	dichloroethane,-1,2, liquid	0	0	0	1	0	0	dichloroethane,-1,2, liquid	0	0	0	1	0	0
diethyl ether, liquid	0	0	0	1	0	0	diethyl ether, liquid	0	0	0	1	0	0	diammonium phosphate (DAP), liquid	0	0	0	1	0	0	diethyl ether, liquid	0	0	0	1	0	0	diethyl ether, liquid	0	0	0	1	0	0
ethanol, liquid	0	0	0	1	0	0	ethanol, liquid	0	0	0	1	0	0	dichloroethane,-1,2, liquid	0	0	0	1	0	0	ethanol, liquid	0	0	0	1	0	0	ethanol, liquid	0	0	0	1	0	0
ethyl cellulose 2p4 DS, liquid	0	0	0	1	0	0	ethyl cellulose 2p4 DS, liquid	0	0	0	1	0	0	diethyl ether, liquid	0	0	0	1	0	0	ethyl cellulose 2p4 DS, liquid	0	0	0	1	0	0	ethyl cellulose 2p4 DS, liquid	0	0	0	1	0	0
glycerol, liquid	0	0	0	1	0	0	glycerol, liquid	0	0	0	1	0	0	ethanol, liquid	0	0	0	1	0	0	glycerol, liquid	0	0	0	1	0	0	glycerol, liquid	0	0	0	1	0	0
grease / oil, liquid	0	0	0	1	0	0	grease / oil, liquid	0	0	0	1	0	0	ethyl cellulose 2p4 DS, liquid	0	0	0	1	0	0	grease / oil, liquid	0	0	0	1	0	0	grease / oil, liquid	0	0	0	1	0	0
Hydrogen chloride, liquid	0	0	0	1	0	0	Hydrogen chloride, liquid	0	0	0	1	0	0	glycerol, liquid	0	0	0	1	0	0	Hydrogen chloride, liquid	0	0	0	1	0	0	Hydrogen chloride, liquid	0	0	0	1	0	0
hydrogen peroxide, liquid	0	0	0	1	0	0	hydrogen peroxide, liquid	0	0	0	1	0	0	grease / oil, liquid	0	0	0	1	0	0	hydrogen peroxide, liquid	0	0	0	1	0	0	hydrogen peroxide, liquid	0	0	0	1	0	0
Iron (Fe++, Fe3+), liquid	0	0	0	1	0	0	Iron (Fe++, Fe3+), liquid	0	0	0	1	0	0	Hydrogen chloride, liquid	0	0	0	1	0	0	Iron (Fe++, Fe3+), liquid	0	0	0	1	0	0	Iron (Fe++, Fe3+), liquid	0	0	0	1	0	0
lead, liquid	0	0	0	1	0	0	lead, liquid	0	0	0	1	0	0	hydrogen peroxide, liquid	0	0	0	1	0	0	lead, liquid	0	0	0	1	0	0	lead, liquid	0	0	0	1	0	0
Mobile ions, liquid	0	0	0	1	0	0	Mobile ions, liquid	0	0	0	1	0	0	Iron (Fe++, Fe3+), liquid	0	0	0	1	0	0	Mobile ions, liquid	0	0	0	1	0	0	Mobile ions, liquid	0	0	0	1	0	0
nickel, liquid	0	0	0	1	0	0	nickel, liquid	0	0	0	1	0	0	lead, liquid	0	0	0	1	0	0	nickel, liquid	0	0	0	1	0	0	nickel, liquid	0	0	0	1	0	0
nitrogen, atomic, liquid	0	0	0	1	0	0	nitrogen, atomic, liquid	0	0	0	1	0	0	Mobile ions, liquid	0	0	0	1	0	0	nitrogen, atomic, liquid	0	0	0	1	0	0	nitrogen, atomic, liquid	0	0	0	1	0	0
Phosphorus emission, liquid	0	0	0	1	0	0	Phosphorus emission, liquid	0	0	0	1	0	0	nickel, liquid	0	0	0	1	0	0	Phosphorus emission, liquid	0	0	0	1	0	0	Phosphorus emission, liquid	0	0	0	1	0	0
pyrolysis gas, liquid	0	0	0	1	0	0	pyrolysis gas, liquid	0	0	0	1	0	0	pyrolysis gas, liquid	0	0	0	1	0	0	pyrolysis gas, liquid	0	0	0	1	0	0	pyrolysis gas, liquid	0	0	0	1	0	0
silver, liquid	0	0	0	1	0	0	silver, liquid	0	0	0	1	0	0	silver, liquid	0	0	0	1	0	0	silver, liquid	0	0	0	1	0	0	silver, liquid	0	0	0	1	0	0
Sodium chlorate, liquid	0	0	0	1	0	0	Sodium chlorate, liquid	0	0	0	1	0	0	Sodium chlorate, liquid	0	0	0	1	0	0	Sodium chlorate, liquid	0	0	0	1	0	0	Sodium chlorate, liquid	0	0	0	1	0	0
Sodium chloride, liquid	0	0	0	1	0	0	Sodium chloride, liquid	0	0	0	1	0	0	Sodium chloride, liquid	0	0	0	1	0	0	Sodium chloride, liquid	0	0	0	1	0	0	Sodium chloride, liquid	0	0	0	1	0	0
Sodium hydroxide, liquid	0	0	0	1	0	0	Sodium hydroxide, liquid	0	0	0	1	0	0	Sodium hydroxide, liquid	0	0	0	1	0	0	Sodium hydroxide, liquid	0	0	0	1	0	0	Sodium hydroxide, liquid	0	0	0	1	0	0
Sodium hypochlorite, liquid	0	0	0	1	0	0	Sodium hypochlorite, liquid	0	0	0	1	0	0	Sodium hypochlorite, liquid	0	0	0	1	0	0	Sodium hypochlorite, liquid	0	0	0	1	0	0	Sodium hypochlorite, liquid	0	0	0	1	0	0
sodium ion, liquid	0	0	0	1	0	0	sodium ion, liquid	0	0	0	1	0	0	sodium ion, liquid	0	0	0	1	0	0	sodium ion, liquid	0	0	0	1	0	0	sodium ion, liquid	0	0	0	1	0	0
Sodium sulfate, liquid	0	0	0	1	0	0	Sodium sulfate, liquid	0	0	0	1	0	0	Sodium sulfate, liquid	0	0	0	1	0	0	Sodium sulfate, liquid	0	0	0	1	0	0	Sodium sulfate, liquid	0	0	0	1	0	0
Solids, inorganic, liquid	0	0	0	1	0	0	Solids, inorganic, liquid	0	0	0	1	0	0	Solids, inorganic, liquid	0	0	0	1	0	0	Solids, inorganic, liquid	0	0	0	1	0	0	Solids, inorganic, liquid	0	0	0	1	0	0
TDS, liquid	0	0	0	1	0	0	TDS, liquid	0	0	0	1	0	0	TDS, liquid	0	0	0	1	0	0	TDS, liquid	0	0	0	1	0	0	TDS, liquid	0	0	0	1	0	0
toluene, liquid	0	0	0	1	0	0	toluene, liquid	0	0	0	1	0	0	toluene, liquid	0	0	0	1	0	0	toluene, liquid	0	0	0	1	0	0	toluene, liquid	0	0	0	1	0	0
Zinc, liquid	0	0	0	1	0	0	Zinc, liquid	0	0	0	1	0	0	Zinc, liquid	0	0	0	1	0	0	Zinc, liquid	0	0	0	1	0	0	Zinc, liquid	0	0	0	1	0	0
ARSENIC(V), solid	0	0	0	1	0	0	ARSENIC(V), solid	0	0	0	1	0	0	ARSENIC(V), solid	0	0	0	1	0	0	ARSENIC(V), solid	0	0	0	1	0	0	ARSENIC(V), solid	0	0	0	1	0	0
Boric acid, solid	0	0	0	1	0	0	Boric acid, solid	0	0	0	1	0	0	Boric acid, solid	0	0	0	1	0	0	Boric acid, solid	0	0	0	1	0	0	Boric acid, solid	0	0	0	1	0	0
Calcium carbonate, solid	0	0	0	1	0	0	Calcium carbonate, solid	0	0	0	1	0	0	Calcium carbonate, solid	0	0	0	1	0	0	Calcium carbonate, solid	0	0	0	1	0	0	Calcium carbonate, solid	0	0	0	1	0	0
calcium monoxide, solid	0	0	0	1	0	0	calcium monoxide, solid	0	0	0	1	0	0	calcium monoxide, solid	0	0	0	1	0	0	calcium monoxide, solid	0	0	0	1	0	0	calcium monoxide, solid	0	0	0	1	0	0
Calcium sulfate, solid	0	0	0	1	0	0	Calcium sulfate, solid	0	0	0	1	0	0	Calcium sulfate, solid	0	0	0	1	0	0	Calcium sulfate, solid	0	0	0	1	0	0	Calcium sulfate, solid	0	0	0	1	0	0
Clay, solid	0	0	0	1	0	0	Clay, solid	0	0	0	1	0	0	Clay, solid	0	0	0	1	0	0	Clay, solid	0	0	0	1	0	0	Clay, solid	0	0	0	1	0	0
FeCl3 in 40 pct sol, solid	0	0	0	1	0	0	FeCl3 in 40 pct sol, solid	0	0	0	1	0	0	FeCl3 in 40 pct sol, solid	0	0	0	1	0	0	FeCl3 in 40 pct sol, solid	0	0	0	1	0	0	FeCl3 in 40 pct sol, solid	0	0	0	1	0	0
hazardous waste, solid	0	0	0	1	0	0	hazardous waste, solid	0	0	0	1	0	0	hazardous waste, solid	0	0	0	1	0	0	hazardous waste, solid	0	0	0	1	0	0	hazardous waste, solid	0	0	0	1	0	0
Hydrogen fluoride, solid	0	0	0	1	0	0	Hydrogen fluoride, solid	0	0	0	1	0	0	Hydrogen fluoride, solid	0	0	0	1	0	0	Hydrogen fluoride, solid	0	0	0	1	0	0	Hydrogen fluoride, solid	0	0	0	1	0	0
Impurities, solid	0	0	0	1	0	0	Impurities, solid	0	0	0	1	0	0	Impurities, solid	0	0	0	1	0	0	Impurities, solid	0	0	0	1	0	0	Impurities, solid	0	0	0	1	0	0
lead, solid	0	0	0	1	0	0	lead, solid	0	0	0	1	0	0	lead, solid	0	0	0	1	0	0	lead, solid	0	0	0	1	0	0	lead, solid	0	0	0	1	0	0
Magnesium hydroxide, solid	0	0	0	1	0	0	Magnesium hydroxide, solid	0	0	0	1	0	0	Magnesium hydroxide, solid	0	0	0	1	0	0	Magnesium hydroxide, solid	0	0	0	1	0	0	Magnesium hydroxide, solid	0	0	0	1	0	0
Mercury, solid	0	0	0	1	0	0	Mercury, solid	0	0	0	1	0	0	Mercury, solid	0	0	0	1	0	0	Mercury, solid	0	0	0	1	0	0	Mercury, solid	0	0	0	1	0	0
Mud, solid	0	0	0	1	0	0	Mud, solid	0	0	0	1	0	0	Mud, solid	0	0	0	1	0	0	Mud, solid	0	0	0	1	0	0	Mud, solid	0	0	0	1	0	0
phosphate ore, in ground, solid	0	0	0	1	0	0	phosphate ore, in ground, solid	0	0	0	1	0	0	phosphate ore, in ground, solid	0	0	0	1	0	0	phosphate ore, in ground, solid	0	0	0	1	0	0	phosphate ore, in ground, solid	0	0	0	1	0	0
Phosphate rock (pure), solid	0	0	0	1	0	0	Phosphate rock (pure), solid	0	0	0	1	0	0	Phosphate rock (pure), solid	0	0	0	1	0	0	Phosphate rock (pure), solid	0	0	0	1	0	0	Phosphate rock (pure), solid	0	0	0	1	0	0
Phosphogypsum, solid	0	0	0	1	0	0	Phosphogypsum, solid	0	0	0	1	0	0	Phosphogypsum, solid	0	0	0	1	0	0	Phosphogypsum, solid	0	0	0	1	0	0	Phosphogypsum, solid	0	0	0	1	0	0
Phosphoric acid, solid	0	0	0	1	0	0	Phosphoric acid, solid	0	0	0	1	0	0	Phosphoric acid, solid	0	0	0	1	0	0	Phosphoric acid, solid	0	0	0	1	0	0	Phosphoric acid, solid	0	0	0	1	0	0
Silica, solid	0	0	0	1	0	0	Silica, solid	0	0	0	1	0	0	Silica, solid	0	0	0	1	0	0	Silica, solid	0	0	0	1	0	0	Silica, solid	0	0	0	1	0	0
Sodium chloride, solid	0	0	0	1	0	0	Sodium chloride, solid	0	0	0	1	0	0	Sodium chloride, solid	0	0	0	1	0	0	Sodium chloride, solid	0	0	0	1	0	0	Sodium chloride, solid	0	0	0	1	0	0
Solid waste, solid	0	0	0	1	0	0	Solid waste, solid	0	0	0	1	0	0	Solid waste, solid	0	0	0	1	0	0	Solid waste, solid	0	0	0	1	0	0	Solid waste, solid	0	0	0	1	0	0
Sulfuric acid, solid	0	0	0	1	0	0	Sulfuric acid, solid	0	0	0	1	0	0	Sulfuric acid, solid	0	0	0	1	0	0	Sulfuric acid, solid	0	0	0	1	0	0	Sulfuric acid, solid	0	0	0	1	0	0
suspended matter (unspecified), solid	0	0	0	1	0	0	suspended matter (unspecified), solid	0	0	0	1	0	0	suspended matter (unspecified), solid	0	0	0	1	0	0	suspended matter (unspecified), solid	0	0	0	1	0	0	suspended matter (unspecified), solid	0	0	0	1	0	0
thallium, solid	0	0	0	1	0	0	thallium, solid	0	0	0	1	0	0	thallium, solid	0	0	0	1	0	0	thallium, solid	0	0	0	1	0	0	thallium, solid	0	0	0	1	0	0
tincal (borax), solid	0	0	0	1	0	0	tincal (borax), solid	0	0	0	1	0	0	tincal (borax), solid	0	0	0	1	0	0	tincal (borax), solid	0	0	0	1	0	0	tincal (borax), solid	0	0	0	1	0	0
Vanadium, solid	0	0	0	1	0	0	Vanadium, solid	0	0	0	1	0	0	Vanadium, solid	0	0	0	1	0	0	Vanadium, solid	0	0	0	1	0	0	Vanadium, solid	0	0	0	1	0	0
Total raw materials, raw material	0	0	0	1	0	0	Total raw materials, raw material	0	0	0	1	0	0	Total raw materials, raw material	0	0	0	1	0	0	Total raw materials, raw material	0	0	0	1	0	0	Total raw materials, raw material	0	0	0	1	0	0
0	0	0	0	1	0	0	0	0	0	0	1	0	0	0	0	0	0	1	0	0	0	0	0	0	1	0	0	0	0	0	0	1	0	0
0	0	0	0	1	0	0	0	0	0	0	1	0	0	0	0	0	0	1	0	0	0	0	0	0	1	0	0	0	0	0	0	1	0	0
0	0	0	0	1	0	0	0	0	0	0	1	0	0	0	0	0	0	1	0	0	0	0	0	0	1	0	0	0	0	0	0	1	0	0
0	0	0	0	1	0	0	0	0	0	0	1	0	0	0	0	0	0	1	0	0	0	0	0	0	1	0	0	0	0	0	0	1	0	0
0	0	0	0	1	0	0	0	0	0	0	1	0	0	0	0	0	0	1	0	0	0	0	0	0	1	0	0	0	0	0	0	1	0	0
0	0	0	0	1	0	0	0	0	0	0	1	0	0	0	0	0	0	1	0	0	0	0	0	0	1	0	0	0	0	0	0	1	0	0
name, air	0	0	0	1	0	0	name, air	0	0	0	1	0	0	name, air	0	0	0	1	0	0	name, air	0	0	0	1	0	0	name, air	0	0	0	1	0	0
Total Air emissions, air	0	0	0	1	0	0	Total Air emissions, air	0	0	0	1	0	0	Total Air emissions, air	0	0	0	1	0	0	Total Air emissions, air	0	0	0	1	0	0	Total Air emissions, air	0	0	0	1	0	0
0	0	0	0	1	0	0	0	0	0	0	1	0	0	0	0	0	0	1	0	0	0	0	0	0	1	0	0	0	0	0	0	1	0	0
0	0	0	0	1	0	0	0	0	0	0	1	0	0	0	0	0	0	1	0	0	0	0	0	0	1	0	0	0	0	0	0	1	0	0
name, liquid	0	0	0	1	0	0	name, liquid	0	0	0	1	0	0	name, liquid	0	0	0	1	0	0	name, liquid	0	0	0	1	0	0	name, liquid	0	0	0	1	0	0
Total Water emissions, liquid	0	0	0	1	0	0	Total Water emissions, liquid	0	0	0	1	0	0	Total Water emissions, liquid	0	0	0	1	0	0	Total Water emissions, liquid	0	0	0	1	0	0	Total Water emissions, liquid	0	0	0	1	0	0
0	0	0	0	1	0	0	0	0	0	0	1	0	0	0	0	0	0	1	0	0	0	0	0	0	1	0	0	0	0	0	0	1	0	0
0	0	0	0	1	0	0	0	0	0	0	1	0	0	0	0	0	0	1	0	0	0	0	0	0	1	0	0	0	0	0	0	1	0	0
solid	0	0	0	1	0	0	solid	0	0	0	1	0	0	solid	0	0	0	1	0	0	solid	0	0	0	1	0	0	solid	0	0	0	1	0	0
Total Solid emissions, solid	0	0	0	1	0	0	Total Solid emissions, solid	0	0	0	1	0	0	Total Solid emissions, solid	0	0	0	1	0	0	Total Solid emissions, solid	0	0	0	1	0	0	Total Solid emissions, solid	0	0	0	1	0	0

[truncated: 57 more sheets: hydroxyethyl cellulose CT, hydroxyethyl cellulose CC, Methocel E5 LV CT, Methocel E5 LV CC, Methocel K100M CT, Methocel K100M CC, Polysorbat 80 CT, Polysorbat 80 CC, Polyethylene glycol 6000 CT, Polyethylene glycol 6000 CC, MCC CT, MCC CC, Methyl cellulose CT, Methyl cellulose CC, Eudragit L 100-55 CT, Eudragit L 100-55 CC, PVP CT, PVP CC, PVA CT, PVA CC …]
